# Supplementary material for: Use of surveys to evaluate an integrated oral cholera vaccine campaign in response to a cholera outbreak in Hoima district, Uganda
Source: PubMed Central journal article supplement (PMC7733212; doi:10.1136/bmjopen-2020-038464), 2020-12-10
Supplement: bmjopen-2020-038464.draft_revisions.pdf [file bmjopen-2020-038464.draft_revisions.pdf]

# BMJ Open

BMJ Open is committed to open peer review. As part of this commitment we make the peer review history of every article we publish publicly available.

When an article is published we post the peer reviewers' comments and the authors' responses online. We also post the versions of the paper that were used during peer review. These are the versions that the peer review comments apply to.

The versions of the paper that follow are the versions that were submitted during the peer review process. They are not the versions of record or the final published versions. They should not be cited or distributed as the published version of this manuscript.

BMJ Open is an open access journal and the full, final, typeset and author-corrected version of record of the manuscript is available on our site with no access controls, subscription charges or pay-per-view fees (<http://bmjopen.bmj.com>).

If you have any questions on BMJ Open's open peer review process please email [info.bmjopen@bmj.com](mailto:info.bmjopen@bmj.com)

# BMJ Open

## Lessons and challenges of implementing an integrated oral cholera vaccine and WaSH response to a cholera epidemic in Hoima district, Uganda

|                               |                                                                                                                                                                                                                                                                                                                                                                                                                                                                                                                                                                                                                                                                                                                                                                                                                        |
|-------------------------------|------------------------------------------------------------------------------------------------------------------------------------------------------------------------------------------------------------------------------------------------------------------------------------------------------------------------------------------------------------------------------------------------------------------------------------------------------------------------------------------------------------------------------------------------------------------------------------------------------------------------------------------------------------------------------------------------------------------------------------------------------------------------------------------------------------------------|
| Journal:                      | <i>BMJ Open</i>                                                                                                                                                                                                                                                                                                                                                                                                                                                                                                                                                                                                                                                                                                                                                                                                        |
| Manuscript ID                 | bmjopen-2020-038464                                                                                                                                                                                                                                                                                                                                                                                                                                                                                                                                                                                                                                                                                                                                                                                                    |
| Article Type:                 | Original research                                                                                                                                                                                                                                                                                                                                                                                                                                                                                                                                                                                                                                                                                                                                                                                                      |
| Date Submitted by the Author: | 11-Mar-2020                                                                                                                                                                                                                                                                                                                                                                                                                                                                                                                                                                                                                                                                                                                                                                                                            |
| Complete List of Authors:     | Bwire, Godfrey; Republic of Uganda Ministry of Health, Community Health<br>Roskosky, Mellisa; Johns Hopkins University Bloomberg School of Public Health, International Health<br>Ballard, Anne; Johns Hopkins University Bloomberg School of Public Health, Center for Communications Programs<br>Brooks, W; Johns Hopkins University Bloomberg School of Public Health, International Health<br>Alfred, Okello; Makerere University College of Health Sciences<br>Rafael, Florentina; World Health Organization, Infectious Hazard Management<br>Ampaire, Immaculate; Republic of Uganda Ministry of Health, Expanded Program on Immunization<br>Orach, Christopher; Makerere University College of Health Sciences<br>Sack, David; Johns Hopkins University Bloomberg School of Public Health, International Health |
| Keywords:                     | Gastrointestinal infections < GASTROENTEROLOGY, International health services < HEALTH SERVICES ADMINISTRATION & MANAGEMENT, Epidemiology < INFECTIOUS DISEASES, Infection control < INFECTIOUS DISEASES, Public health < INFECTIOUS DISEASES, Tropical medicine < INFECTIOUS DISEASES                                                                                                                                                                                                                                                                                                                                                                                                                                                                                                                                 |
|                               |                                                                                                                                                                                                                                                                                                                                                                                                                                                                                                                                                                                                                                                                                                                                                                                                                        |

SCHOLARONE™  
Manuscripts

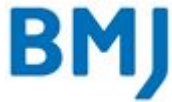

I, the Submitting Author has the right to grant and does grant on behalf of all authors of the Work (as defined in the below author licence), an exclusive licence and/or a non-exclusive licence for contributions from authors who are: i) UK Crown employees; ii) where BMJ has agreed a CC-BY licence shall apply, and/or iii) in accordance with the terms applicable for US Federal Government officers or employees acting as part of their official duties; on a worldwide, perpetual, irrevocable, royalty-free basis to BMJ Publishing Group Ltd ("BMJ") its licensees and where the relevant Journal is co-owned by BMJ to the co-owners of the Journal, to publish the Work in this journal and any other BMJ products and to exploit all rights, as set out in our [licence](#).

The Submitting Author accepts and understands that any supply made under these terms is made by BMJ to the Submitting Author unless you are acting as an employee on behalf of your employer or a postgraduate student of an affiliated institution which is paying any applicable article publishing charge ("APC") for Open Access articles. Where the Submitting Author wishes to make the Work available on an Open Access basis (and intends to pay the relevant APC), the terms of reuse of such Open Access shall be governed by a Creative Commons licence – details of these licences and which [Creative Commons](#) licence will apply to this Work are set out in our licence referred to above.

Other than as permitted in any relevant BMJ Author's Self Archiving Policies, I confirm this Work has not been accepted for publication elsewhere, is not being considered for publication elsewhere and does not duplicate material already published. I confirm all authors consent to publication of this Work and authorise the granting of this licence.

1  
2  
3 1 **Lessons and challenges of implementing an integrated oral cholera vaccine and WaSH**  
4 2 **response to a cholera epidemic in Hoima district, Uganda**  
5 3

6  
7 4 *Godfrey Bwire*<sup>1</sup>, *Mellisa Roskosky*<sup>2</sup>, *Anne Ballard Sara*<sup>2</sup>, *W. Abdullah Brooks*<sup>2</sup>, *Alfred Okello*<sup>3</sup>,  
8 5 *Florentina Rafael*<sup>4</sup>, *Immaculate Ampeire*<sup>5</sup>, *Christopher Garimoi Orach*<sup>3</sup>, *David A. Sack*<sup>2</sup>.  
9 6

10  
11  
12 7 **Authors' affiliations:**

- 13 8 1. Ministry of Health, Department of Community Health, Kampala Uganda.  
14 9 2. Johns Hopkins Bloomberg School of Public Health, Department of International Health,  
15 10 Baltimore, Maryland USA.  
16 11 3. Makerere University, College of Health Sciences, Kampala, Uganda.  
17 12 4. World Health Organization, Department of Infectious Hazard Management, Geneva,  
18 13 Switzerland.  
19 14 5. Ministry of Health, Uganda National Expanded Program on Immunization  
20 15  
21 16  
22 17

23 18 \*Corresponding author.

24 19 Professor David A. Sack, M, D.

25 20 Johns Hopkins Bloomberg School of Public Health

26 21 615 North Wolfe Street

27 22 Baltimore, Maryland 21205 USA

28 23 Phone +1 443 287 8795

29 24 Email: [dsack1@jhu.edu](mailto:dsack1@jhu.edu)  
30 25

31 26 Word count of title page: 134

32 27 Word count (Excluding abstract): 3677

33 28 Abstract word count: 314  
34 29

35 30 **Key words:** cholera, vaccination, Uganda, monitoring, coverage, outbreak, Hoima, oral cholera  
36 31 vaccine, Vaccine campaign  
37 32  
38 33  
39 34  
40 35  
41 36  
42 37  
43 38  
44 39  
45 40  
46 41  
47 42  
48 43  
49 44  
50 45  
51 46  
52 47  
53 48  
54 49  
55 50  
56 51  
57 52  
58 53  
59 54  
60 55

1  
2  
3 31 **ABSTRACT**

4 32 **Background.** Cholera is preventable and treatable through application of surveillance, case  
5 33 management, water, sanitation and hygiene (WaSH) complemented by oral cholera vaccine  
6 34 (OCV). Vaccine was first introduced in Uganda during an outbreak in Hoima district in May -  
7 35 June 2018. Since OCV was new for Uganda, documentation of this campaign provided  
8 36 important lessons for future OCV campaigns in Uganda and elsewhere.

9 37 **Methods.** Surveys conducted during and post campaign consisted of two sub-studies. Sub-  
10 38 study one assessed the knowledge and practices of OCV staff who implemented the OCV  
11 39 campaign. Sub study two used a two-stage cluster random sampling technique to select 31  
12 40 villages (clusters) from which 4 – 7 households were randomly selected and interviewed to  
13 41 assess vaccine coverage, the community's knowledge and practice of cholera prevention and  
14 42 the participant's understanding of OCV.

15 43 **Results.** In sub-study 1, most staff (93%) were knowledgeable about cholera control; however,  
16 44 29% did not clearly understand detecting and managing adverse events following immunization  
17 45 (AEFI). In sub-study two, 209 households (1,259 individuals) were surveyed, of whom 1178  
18 46 (93%) reported receiving at least one OCV dose and 986 (78%) reported receiving two doses.  
19 47 Among vaccinated individuals, minor complaints were reported by 71 persons (5.6%).  
20 48 Individuals with 'some' education (primary or secondary school) were more knowledgeable  
21 49 regarding the required OCV doses compared to non-educated (p-value = 0.04). Factors  
22 50 negatively associated with campaign implementation included community sensitisation time,  
23 51 staff payment and problems with field transport. Although the campaign was carried out quickly,  
24 52 the outbreak was over before the campaign started.

25 53 **Conclusion.** The campaign achieved high OCV coverage, but the surveys provided insights for  
26 54 improvement. For greater vaccine coverage, more effort is needed for community sensitisation,  
27 55 and additional resources for staff transportation and timely payment is required. Pre and post-  
28 56 test assessment of staff training can identify and address knowledge and skill gaps.

29 57  
30  
31  
32  
33  
34  
35  
36  
37  
38  
39  
40  
41  
42  
43  
44  
45  
46  
47  
48  
49  
50  
51  
52  
53  
54  
55  
56  
57

1  
2  
3 **58 Strengths and limitations of this study**  
4

- 5 59 • This is an evaluation of the first oral cholera vaccine (OCV) campaign in Uganda  
6 60 • Coverage rates were high, indicating a successful campaign  
7  
8 61 • Evaluation of the vaccination staff immediately following each round identified ways to  
9 improve performance in the next round.  
10 62  
11 63 • Communities readily accepted OCV, but some were not sure of the timing of the second  
12 dose  
13 64  
14 65 • Improvements were needed in the program to detect and manage potential adverse events  
15 following immunization (AEFI).  
16 66  
17 67

## 68 INTRODUCTION

69 Cholera, a preventable and treatable disease is characterized by profuse watery diarrhoea  
70 caused by infection of the intestine with the bacterium *Vibrio cholerae*.<sup>1 2</sup> Cholera is a major  
71 cause of morbidity and mortality in several countries in sub-Saharan Africa where cholera  
72 outbreaks also negatively affect development due to associated high economic burden.<sup>3 4</sup>  
73 Between 2010 and 2016 an average 141,918 incident cases annually were reported from sub-  
74 Saharan African countries, including Uganda.<sup>5</sup> In Uganda, cholera outbreaks occurred as both  
75 endemic and epidemic disease. Epidemic disease occurred in northern and eastern Uganda  
76 districts<sup>6</sup> and are thought to be worsened by contamination of safe water due to poor  
77 sanitation.<sup>7</sup> Endemic cholera outbreaks occur in districts along the international borders with the  
78 Democratic Republic of the Congo (DR Congo), South Sudan and Kenya and along the Great  
79 lakes.<sup>6 8</sup> These districts include Hoima, where cholera is endemic.<sup>6 9-11</sup> The World Health  
80 Organization (WHO) recommends an integrated approach to cholera prevention where water,  
81 sanitation and hygiene (WaSH) interventions are complemented by vaccine campaigns which  
82 provide oral cholera vaccine (OCV) to persons living in areas considered high risk.<sup>3</sup> These  
83 campaigns may be either preventive, in which the vaccine is targeted to cholera hotspots, or  
84 reactive in which the campaign is implemented in response to an outbreak or a humanitarian  
85 emergency.<sup>12</sup> There are two OCVs WHO-prequalified currently available from the global  
86 stockpile: Shanchol (Shantha Biotechnics Limited, India), and Euvichol (Eubiologics Co., Ltd.,  
87 Korea).<sup>3</sup> The standard immunization schedule consists of two doses given at an interval of at  
88 least two weeks to all persons in the target area above one year of age. While there is  
89 increasing use of OCV to control outbreaks, preventive use is constrained due to inadequate  
90 vaccine supply.<sup>13</sup> Since creation of a global OCV stockpile in July, 2013, several OCV  
91 campaigns had been successfully implemented<sup>12 13</sup> but it is still important to document national  
92 campaign experiences as well as monitoring and evaluation activities, to continually improve the  
93 effectiveness and efficiency of vaccine campaigns.

94

95 The Ugandan Ministry of Health (MoH) had already prepared plans for OCV campaigns in the  
96 areas identified as cholera hotspots starting in the western districts of Uganda (including  
97 Hoima), near the border with DR Congo and close to, or adjoining Lake Albert. These hotspot  
98 districts and their specified subcounties were confirmed during a national cholera workshop in  
99 Kampala on 29-31 January 2018. This workshop led to the development of an application for  
100 OCV to the Global Taskforce for Cholera Control (GTFCC) which was submitted on 14 February  
101 2018. The application proposed providing OCV in these identified hotspots as a preventive

1  
2  
3 102 strategy. However, while preparations for these campaigns were underway, an outbreak was  
4 103 declared in Hoima district on 23 February 2018. The earliest cases were identified among DR  
5 104 Congo refugees, but then other cases were seen among the non-refugee Ugandan population.  
6 105 The MoH responded to the outbreak with multisectoral interventions, including proper case  
7 106 management, promotion of access to safe water and improved sanitation (WaSH), enhanced  
8 107 cholera surveillance, as well as infection control and health education. These measures were  
9 108 then supplemented with plans to carry out an emergency OCV campaign. Thus, the plans for a  
10 109 preventive OCV campaign were shifted to an emergency response to control the outbreak. The  
11 110 first doses of vaccine arrived on 28 March and first round of vaccines started on 2 May. The  
12 111 doses for the second round arrived on 29 May and the second round started on 26 June. A  
13 112 door-to-door strategy was used to deliver two doses of vaccine to an estimated 360,000 people,  
14 113 including pregnant women, over the age of one year residing in the four targeted subcounties.  
15  
16  
17  
18  
19  
20  
21  
22  
23

24 115 To carry out the campaign, the MoH organized all activities including logistics, community  
25 116 mobilisation and implementation; coordinating ground activities through an assigned point  
26 117 person. Many stakeholders contributed to the campaign including the Hoima district local  
27 118 government, World Health Organisation, UNICEF, UNHCR and Médecins sans Frontiers'  
28 119 (MSF). Prior to the campaign, the stakeholders met in order to define and coordinate their  
29 120 complementary tasks.  
30  
31  
32  
33  
34

35 122 This was the first time OCV was deployed in Uganda, and after this initial campaign, the MoH  
36 123 intended to continue with its plans for preventive campaigns in the remaining cholera hotspot  
37 124 districts. Since this was the first OCV use in Uganda, and there was no prior experience to  
38 125 guide responders and implementers, this study was carried out with the aim to document  
39 126 campaign activities and to monitor and evaluate its procedures and outcomes that could guide  
40 127 future OCV campaigns. The issues addressed during this study included the knowledge and  
41 128 practices of the campaign staff, vaccine coverage in the targeted areas, and the knowledge and  
42 129 practices of the community.  
43  
44  
45  
46  
47  
48

## 49 131 **MATERIALS AND METHODS**

50  
51

52 133 *Study setting.* Hoima district is located in western Uganda, across Lake Albert from DR Congo.  
53 134 It has a total area of 5735.5 square kilometres and a projected population of 630,000 persons  
54 135 (2018). The district consists of 13 administrative units as follows: 10 sub counties  
55  
56  
57  
58  
59  
60



1  
2  
3 136 (Kyabigambire, Buhimba, Kyangwali, Kabwoya, Bugambe, Kiziranfumbi, Kitoba, Kigorobyia,  
4 137 Buseruka and Buhanika), a municipality (Hoima municipality) and two town council (Kigorobyia  
5 138 and Buhima town councils). The major economic activities of the population in Hoima are  
6 139 substance agriculture and fishing. Cholera is endemic in the district but the endemicity is  
7 140 localised in some specific subcounties particularly those with fishing communities.<sup>14</sup>  
8  
9  
10

11 141

12  
13 142 **Epidemiologic findings.** After the outbreak, an anonymous line list of cases and deaths, by  
14 143 date and stated nationality was used to describe the basic epidemiological features of the  
15 144 outbreak.

16  
17 145 *Population and design for the Monitoring and Evaluation of the Vaccination Campaign.* A cross-  
18 146 sectional study was conducted between May and June 2018 in Hoima districts in the  
19 147 subcounties where the OCV campaign was conducted. This included four sub-counties:  
20 148 Buseruka, Kabwoya, Kangwali, and Kigorobyia which together constitute the six administrative  
21 149 units of Kyangwali, Kigorobyia, Kabwoya Buseruka, Kigorobyia town council and Kyangwali  
22 150 refugee settlement (Old and New) as shown in Figure 1. The study consisted of two sub-  
23 151 studies. Sub-study 1 assessed the knowledge and practices of staff who participated in and  
24 152 contributed to the OCV campaign. Sub-study 2 was a cluster randomised community survey  
25 153 that assessed vaccine coverage, detection of adverse events following immunization (AEFI),  
26 154 and indicators of community knowledge regarding cholera.  
27  
28  
29  
30  
31  
32  
33

34 155

35 156 *Sub-study 1, staff assessment.* Staff were assessed on their level of knowledge on the cause of  
36 157 cholera, the importance of safe water in cholera prevention, the target age group for cholera  
37 158 vaccination, and knowledge about AEFI and the procedures for care should subjects experience  
38 159 an AEFI. Staff were surveyed twice with each survey taking place within two weeks after  
39 160 administration of the first and second OCV rounds, respectively. All staff who participated  
40 161 directly by administering the vaccines or indirectly through supervisory roles and who were  
41 162 present at the workstation during the study period were enrolled in the survey. For the staff  
42 163 survey, structured questions were administered on paper questionnaires that allowed for adding  
43 164 text to explain the answers (open-ended questions). There was no list of all workers in the  
44 165 campaign and many of the workers who participated in the second round had left prior to  
45 166 administering the questionnaire; thus, there were fewer respondents in the second round and  
46 167 the proportion of all workers who participated could not be determined precisely.  
47  
48  
49  
50  
51  
52  
53

54 168

1  
2  
3 169 *Sub-study 2, cluster surveys.* Sub-study 2 was carried out with the intention of obtaining  
4 170 information from a representative sample of families in the target area. The study population  
5 171 included each person > one year of age who was living in the OCV targeted area at the time of  
6 172 the vaccination campaign. This sample consisted of 31 household clusters with 4-7 households  
7 173 per cluster. We assumed a household size of five persons. A standard formula for cluster  
8 174 sampling was used to derive the sample size.<sup>15</sup> The sample was increased in order to increase  
9 175 the analytical power and precision of the surveys, using the formula  $n = (z^2pq)/d^2$ , where 'n' is  
10 176 the number of people desired for the survey, 'd' is the precision of the result, 'z' is the  
11 177 confidence limit, and 'p' and 'q' correspond to the proportion of persons in the population who  
12 178 are immunised and not immunised, respectively. To identify the clusters, a list of villages was  
13 179 obtained from each of the four subcounties targeted for vaccination. From these lists, Excel  
14 180 random number generator (=RANDBETWEENBOTTOM, TOP) was used to select the 31  
15 181 villages from which households were selected. From each selected village a list of households  
16 182 was obtained from village administrative leader (Local Council (LC) – 1: is the smallest  
17 183 recognised administrative unit in Uganda. It is headed an elected leader called LC-1) and used  
18 184 to identify the household by random selection similar to that used to select the villages or  
19 185 clusters. The subcounty population was obtained from the district planning unit and used to  
20 186 compute the number of households for each sub county as indicated in Table 1.  
21  
22  
23  
24  
25  
26  
27  
28  
29  
30  
31  
32

33  
34 **Table 1. Age and Sex Breakdown of the**  
35  
36 **Participants in the Cluster Survey**

| Age Group (years) | Male | Female | Total |
|-------------------|------|--------|-------|
| 1 to 4            | 99   | 93     | 192   |
| 5 to 14           | 236  | 207    | 443   |
| 15 to 44          | 210  | 285    | 495   |
| 45+               | 80   | 65     | 145   |
| <b>Total</b>      | 625  | 650    | 1275  |

37  
38  
39  
40  
41  
42  
43  
44  
45  
46  
47  
48  
49  
50  
51 188  
52  
53 189 For the household interviews, data were collected through standardized questionnaires during  
54 190 face-to-face interviews conducted by trained research assistants using the local language.  
55  
56 191 Within a selected household the questionnaires were administered to the key respondents  
57  
58  
59  
60

1  
2  
3 192 (head of the HHs), who represented the entire household. If the HH was absent, additional visits  
4 193 were scheduled. In two households, a person could not be located, and the household was  
5 194 dropped. For each vaccinated person, the research assistants assessed cholera immunization  
6 195 status through oral reporting (history) and by reviewing vaccination cards. None of the residents  
7 196 who were approached refused to answer the survey.  
8  
9  
10

11 197  
12 198 *Adverse Events Following Immunization (AEFI)*. The occurrence of AEFIs were assessed by  
13 199 asking for occurrence of symptoms following vaccination. As part of the campaign itself, a  
14 200 routine system for AEFI detection was established in which the vaccine team members advised  
15 201 vaccinees to report to a health worker or to seek care at a health facility if they experienced  
16 202 symptoms following immunization. By contrast, the AEFI surveillance in this study asked the  
17 203 participants who participated in the cluster survey about symptoms they may have experienced.  
18 204 This AEFI sub-study was thus, designed to enhance our understanding of potential AEFIs which  
19 205 may not have been reported through the routine AEFI surveillance.  
20  
21  
22  
23  
24  
25

26 206  
27 207 AEFIs were categorised for each individual member of the household who received a dose of  
28 208 OCV as follows. They were considered mild if the symptoms did not interfere with normal  
29 209 activities; moderate if they interfered somewhat; and severe if the symptoms prevented the  
30 210 individual from continuing normal activities. Persons who reported to be having ongoing  
31 211 symptoms > 72 hours were advised to visit the nearest health facility for more care.  
32  
33  
34  
35

36 213 *Data collection and analysis*. Data from the community surveys were collected by tablet  
37 214 computers using *Kobo Collect* , <https://www.kobotoolbox.org/> installed to record the responses  
38 215 in the field. Data were cleaned, coded and stored in Stata Version 14. Data were analysed to  
39 216 generate frequencies, percentages or proportions and means. Comparisons between groups,  
40 217 such as sub-counties or age strata was done using Chi Square or 2 x X tables with the  
41 218 calculation of odds ratios and 95% confidence intervals. Multivariate analysis was done using  
42 219 conditional logistic regression, or Poisson regression for analysis of uncommon events.  
43 220 Continuous variables were analysed and compared using Student's T test or analysis of  
44 221 variance (ANOVA). The results of analysis were presented in the form of graphs, tables, charts  
45 222 and means and were included in interim and end of campaign reports.  
46  
47  
48  
49  
50  
51

52 223  
53 224 *Quality Assurance*. Research assistants were trained on data collection methods and were able  
54 225 to consult field supervisors and the principal investigator on any issue not clear to them. For  
55  
56  
57  
58  
59  
60

226 quality assurance, the survey supervisors revisited about 10% of the households, not to collect  
227 the data again, but to ensure that they were not skipped by the interviewers for eligible  
228 respondents. The surveys were conducted within two weeks of completion of the second round  
229 of the vaccination campaign to minimize recall bias.

230 *Ethical Considerations.* This study was conducted as part of the routine MoH operational  
231 research for improvement of health services; however ethical issues were considered and  
232 addressed. The proposal was approved by the Makerere University School of Public Health  
233 Institutional Review Board (MaKSPH IRB) and Uganda National Council of Science and  
234 Technology. Written informed consent was obtained from all participants, including for both the  
235 staff and community surveys. Participation in the study was voluntary and respondents were  
236 free to opt out at any stage of the interviews.

237 Confidentiality was observed at all stages of the study. No names or personal identifiers were  
238 included on the questionnaires. The research assistants underwent training on interview  
239 techniques, neutrality and research ethics. The benefits of the study to the staff included the  
240 ability to express themselves, provide feedback and observations that in turn might lead to  
241 improvements in supportive services for their training and work.

242  
243 *Patient and Public Involvement.* This research was done without research subject  
244 involvement. There was not enough time to involve the subjects prior to the vaccine campaign.  
245 They were also not invited to contribute to the writing or editing of this document for readability  
246 or accuracy. However, the findings of the study were disseminated to the Hoima district  
247 administration, MoH and other policymakers to use them to strengthen health service  
248 interventions and future OCV campaigns.

## 250 RESULTS

251 *The epidemic curve.* As shown on Figure 2, the epidemic was declared on the 8<sup>th</sup> week of  
252 2018. A total of 2,122 cases with 44 deaths (case fatality rate, 2.1%) was reported during the  
253 outbreak. Sixty seven percent (1,410) and 64% (28) of the deaths occurred during the first two  
254 weeks of the outbreak. Many of the cases and deaths (1276 and 32, or 60% and 73%,  
255 respectively) occurred among persons who were from DR Congo, nearly all refugees who  
256 developed cholera symptoms soon after arrival in Uganda. Among the 44 deaths reported, 25  
257 (57%) occurred in the community, not in the health facility. Nineteen of the fatal cases were  
258 treated at the health facility; the CFR for facility-treated patients was 0.9%. The vaccination

259 campaign, originally planned as a preventive OCV campaign, was changed to an emergency  
260 response intended to control the outbreak. Because the outbreak was so sudden and was  
261 short-lived, the campaign could only be initiated after the outbreak had already declined.

262 *Sub-study I, staff survey.* A total of 242 and 125 staff were interviewed in the first and second  
263 knowledge and practice (KP) surveys (KP1 and KP2). Most respondents were vaccination team  
264 members (89% and 87% in rounds 1 and 2, respectively). Almost all the respondents were  
265 knowledgeable about the cause of cholera, the importance of safe water in cholera prevention  
266 and the vaccine target group, but were less knowledgeable regarding potential adverse events  
267 following administration (AEFI) or how to advise vaccinees with 29% and 16% being less  
268 informed about AEFI during the first and second surveys.

269 When staff were asked to suggest areas that needed improvement in future OCV campaigns,  
270 more than 10% suggested more timely payment of allowances, more time to sensitize and  
271 inform the communities on the benefits of the vaccine, and better transportation and facilitation  
272 allowances (payments to health workers to cover the cost they incurred when administering the  
273 vaccines or conducting activities related to the OCV campaign). Other suggestions included  
274 use of both static and mobile vaccination points, provision of gumboots, umbrellas, and more  
275 areas for vaccine storage in subcounties where vaccine would be more accessible, more  
276 workers for hard to reach areas, and an increase in the number of vaccine days.

277 *Sub-study II, community survey results.* The community surveys were carried out in four sub-  
278 counties of Buseruka, Kabwoya, Kyangwali and Kigorobya as shown in Figure 1 and Table 1. A  
279 total of 209 households, including 1,259 individuals, were surveyed. Most (96%) of the  
280 respondents were household heads or their spouses. All respondents confirmed that they were  
281 living in the targeted OCV area at the time of the campaign. 51% of the respondents had  
282 primary education, 17% had secondary education, 1% had tertiary education, and the remaining  
283 31% had no education. The respondents were aged 18 – 89 years with a mean age of 40 years.  
284 Both sexes were present, with no statistically significant difference.

285 By verbal reports, 93% of the residents received at least one dose and 78% received two doses  
286 of OCV. Based on the vaccination card to confirm the vaccination status, the two-dose coverage  
287 was 62% (95%CI: 59.4-64.9). 91% of residents received vaccine during the first round and 80%  
288 received vaccine during the second round. Coverage rates are shown on Table 2.

289

290 **Table 2: Vaccination coverage post OCV campaign, Hoima District, Uganda, 2018.**

|                                                              | Round 1      | Round 2      | Received only one dose | Received two doses | Received at least one dose | Total surveyed |
|--------------------------------------------------------------|--------------|--------------|------------------------|--------------------|----------------------------|----------------|
| <b>Reported number (%)</b>                                   | 1,164 (91.2) | 1,027 (80.5) | 195 (15.3)             | 998 (78.3)         | 1193 (93.6)                | 1275           |
| <b>95% CI</b>                                                | 89.7-92.8    | 78.3-82.7    | 13.4-17.4              | 76.0-80.6          | 92.2-94.9                  |                |
| <b>Confirmed by availability of the vaccination card (%)</b> | 1,065 (83.5) | 823 (64.5)   | 304 (23.8)             | 792 (62.1)         | 1096 (86.0)                |                |
| <b>95% CI</b>                                                | 81.5-85.6    | 62.0-67.2    | 21.6-26.3              | 59.5-64.8          | 84.1-87.9                  |                |

291  
292 Among those who did not receive a dose of vaccine, over half of these missed doses (255  
293 missed doses during the two rounds) were because the person was not at home at the time of  
294 vaccination or was out of town. In a few cases, the vaccine team missed the household,  
295 accounting for 53 missed doses. Refusing to take vaccine was not reported.

296  
297 *Reported AEFIs.* Overall, 71 individuals of 1,259 respondents (5.6%) reported an AEFI (Table  
298 3).

300 **Table 3: Treatment and resolution of Adverse Events Following Immunization in**  
301 **Hoima District, Uganda, 2018.**

| Symptoms        | Treatment        |             | Status        |             |                               |
|-----------------|------------------|-------------|---------------|-------------|-------------------------------|
|                 | No treatment (%) | Treated (%) | Recovered (%) | Ongoing (%) | Improved, not to baseline (%) |
| <b>Mild</b>     | 24(80.0)         | 6(20.0)     | 29(96.7)      | 1(3.3)      | 0(0.0)                        |
| <b>Moderate</b> | 11(39.3)         | 17(60.7)    | 23(82.1)      | 3(10.7)     | 2(7.1)                        |

|               |         |         |          |        |         |
|---------------|---------|---------|----------|--------|---------|
| <b>Severe</b> | 8(61.5) | 5(38.5) | 10(76.9) | 0(0.0) | 3(23.1) |
|---------------|---------|---------|----------|--------|---------|

302  
 303 Most of these were considered mild or moderate, but 8 (0.6%) persons reported an AEFI as  
 304 severe. Most (60%) of the persons reporting an AEFI did not seek treatment including 60% of  
 305 those reporting a severe AEFI. 29.6% of the reported adverse events occurred in the first round,  
 306 40.9% in the second round and 29.6% in both rounds. The most common symptoms were  
 307 abdominal pain (15), diarrhoea, (9), fever, nausea and headache (each 6) reports. Table 4  
 308 provides additional information on the AEFIs.

**Table 4. Onset and frequency of symptoms reported as adverse events**

|                  | <6<br>hours | 6-12<br>hours | 12-24<br>hours | 1-2<br>days | 3-7<br>days | 8-14<br>days | Total     |
|------------------|-------------|---------------|----------------|-------------|-------------|--------------|-----------|
| Diarrhoea        | 3           | 2             | 2              | 1           | 1           | 0            | 9         |
| Vomiting         | 3           | 0             | 0              | 0           | 2           | 0            | 5         |
| Nausea           | 6           | 0             | 0              | 0           | 0           | 0            | 6         |
| Abdominal pain   | 15          | 0             | 0              | 0           | 0           | 0            | 15        |
| Stomach gurgling | 0           | 3             | 0              | 1           | 0           | 0            | 4         |
| Mouth ulcers     | 0           | 0             | 0              | 0           | 0           | 1            | 1         |
| cough            | 1           | 1             | 0              | 2           | 1           | 1            | 6         |
| Felt feverish    | 1           | 1             | 0              | 0           | 6           | 1            | 9         |
| Poor appetite    | 1           | 0             | 0              | 0           | 0           | 0            | 1         |
| Dizziness        | 0           | 3             | 0              | 0           | 0           | 0            | 3         |
| Fainted          | 0           | 1             | 0              | 0           | 0           | 0            | 1         |
| Itching          | 0           | 0             | 0              | 0           | 0           | 1            | 1         |
| Weakness         | 0           | 0             | 0              | 0           | 1           | 0            | 1         |
| Headache         | 3           | 0             | 2              | 1           | 0           | 0            | 6         |
| Other            | 1           | 0             | 0              | 2           | 0           | 0            | 3         |
| <b>Total</b>     | <b>34</b>   | <b>11</b>     | <b>4</b>       | <b>7</b>    | <b>11</b>   | <b>4</b>     | <b>71</b> |

310

1  
2  
3 311 *Community knowledge.* Most respondents knew the major signs and symptoms of cholera, that  
4 312 it was related to contaminated water or food, the importance of drinking safe water and hand  
5 313 washing. Following the campaign, they also understood that vaccine was also a way to prevent  
6 314 cholera. There was a statistically significant association between education level and knowledge  
7 315 about OCV, with those having at least a primary school education being two and a half times as  
8 316 likely to know the number of required doses as compared to those with no education (RO 2.46,  
9 317 95% CI 1.09, 5.59 [P = 0.023].

## 14 318 **DISCUSSION**

16 319 Our findings suggest that the OCV campaign in Hoima successfully provided vaccine to a very  
17 320 large proportion of the target population in these four subcounties in western Uganda. 93%  
18 321 reported receiving at least one dose and 78% reported receiving two doses among residents.  
19 322 Given the mobile and transient nature of this population, this was noteworthy, and suggests that  
20 323 even better coverage may be possible for more settled populations in Uganda. Refusal to take  
21 324 vaccine was not a constraint to the campaign, but not finding people at home did result in many  
22 325 missed vaccinations. High coverage is especially important when one is attempting to achieve  
23 326 herd protection. Since it is estimated that herd protection can be achieved with a coverage  
24 327 even lower than 90%;<sup>16</sup> the high coverage achieved in this campaign would be expected to  
25 328 induce significant protection among even those who did not receive vaccine.

26 329  
27 330 It was noted in the administrative report from the MoH and during a stakeholder's meeting that  
28 331 one of the reasons for the reduction in the coverage during the second OCV dose was the  
29 332 unpredictable campaign dates for the second round. The vaccine for the second round had to  
30 333 be shipped and cleared through customs, and the timing for this was not certain. To avoid this  
31 334 problem in the future, a mechanism needs to be established to provide a better timeline for  
32 335 receipt of the vaccine shipments.

33 336  
34 337 Inclusion of staff KP survey contributed to the success by identifying gaps amongst the staff  
35 338 knowledge and performance. After the first staff KP survey, these gaps were communicated to  
36 339 the MoH and the stakeholders responded with appropriate actions to ensure that these gaps  
37 340 were addressed prior to the second round.

38 341  
39 342 As with previous OCV campaigns very few AEFI were reported.<sup>17 18</sup> Most of adverse events  
40 343 were considered mild or moderate and were self-limited. Despite the low prevalence of AEFI,



1  
2  
3 344 the survey exposed the need to better inform the community about seeking treatment for more  
4 345 severe adverse events or for those that do not quickly resolve. This was especially true for  
5 346 those for families with little education who were less likely to seek medical attention for severe  
6 347 AEFI (data not shown).  
7  
8  
9

10 348  
11 349 Most other OCV campaigns have also reported high coverage rates. These have included  
12 350 reports from Bangladesh<sup>19 20</sup>, Malawi<sup>21 22</sup>, Mozambique<sup>17</sup>, Democratic Republic of Congo <sup>23</sup>,  
13 351 Zambia <sup>24</sup>, South Sudan <sup>25 26</sup>, Iraq<sup>27</sup>, Haiti<sup>28</sup>, and Guinea <sup>29</sup>. Clearly, OCV is well accepted  
14 352 among these very diverse population groups where the vaccine campaigns have been carried  
15 353 out.  
16  
17  
18

19 354  
20 355 Important limitations of this study included only one series of surveys for the community, rather  
21 356 than one following each vaccination round. Learning from the community prior to the campaign  
22 357 as well as immediately after the first dose might have provided feedback to the teams that would  
23 358 have improved the coverage for the second round and would have further increased two dose  
24 359 coverage rates. Similarly, more direct observation of the training and coordination meetings  
25 360 would have been useful to independently assess the efficiency and effectiveness of these  
26 361 training and coordination meetings.  
27  
28  
29

30 362  
31 363 The community KP survey did not include questions on attitudes regarding cholera; it was not a  
32 364 KAP survey. Since the survey had to be carried out very quickly following the campaign, and  
33 365 since the survey was targeted to identify issues that would be immediately relevant to campaign  
34 366 performance, it was felt that understanding attitudes regarding cholera, even though important,  
35 367 would have required other qualitative methods requiring more time than was available.  
36  
37  
38  
39  
40

41 368  
42 369 In this outbreak 2,122 cholera cases and 44 deaths were reported, nearly all before the OCV  
43 370 campaign and over half occurred in the first two weeks of the outbreak. Of note, the outbreak  
44 371 started in February 2018 at about the same time the application for preventive use of OCV was  
45 372 being submitted. The original application proposed a series of preventive campaigns over  
46 373 the next year, and Hoima, as well as neighbouring districts in western Uganda, were targeted  
47 374 for vaccination in the first round of these preventive campaigns. However, when the outbreak  
48 375 was identified, plans were quickly shifted so that an emergency campaign could be  
49 376 implemented to control the outbreak. Even though this emergency response was planned as  
50  
51  
52  
53  
54  
55  
56  
57  
58  
59  
60

1  
2  
3 377 quickly as possible, in fact, the outbreak was nearly over before the vaccine campaign could  
4 378 start.

5 379  
6  
7  
8 380 Furthermore, though the outbreak started with the influx of the refugees from DRC into Uganda,  
9 381 it quickly spread to the refugee host communities in Hoima. Therefore, to prevent rapid spread,  
10 382 improvement of cholera prevention measures for both the refugees and the host communities is  
11 383 paramount during resettlement.

12 384

13 385

## 14 386 **CONCLUSION**

15 387 This study suggests that the integrated OCV campaign in Hoima district to prevent cholera was  
16 388 successful and achieved a high level of coverage in this population that was targeted to be at  
17 389 risk. However, there was a need to devote more effort on community sensitisation on the  
18 390 benefits of vaccination, as well as improving some logistic support during the campaign.

19 391

20 392 While a rapid response to this outbreak was appropriate, in fact, even with a rapidly organized  
21 393 campaign, the outbreak was largely over before the vaccine could be given; thus, the vaccine  
22 394 likely had little impact on this outbreak. Nevertheless, this area had already been identified as a  
23 395 hotspot, and it would have been targeted if the planned preventive campaign had proceeded as  
24 396 originally planned. Planners must realize that an area identified as a hotspot might experience  
25 397 an outbreak while preparations are underway for a preventive campaign and take this into  
26 398 account when allocating vaccine for preventive vs emergency campaigns. Since these are  
27 399 areas where cholera risk is high, outbreaks are likely to occur in these areas if there are delays  
28 400 in implementing preventive campaigns.

29 401

30 402

## 31 403 **LEGENDS**

32 404

33 405 **Figure 1: Map of Hoima District, showing sub-counties that received OCV and**  
34 406 **households where interviews were conducted (red dots)**

35 407  
36  
37  
38  
39  
40  
41  
42  
43  
44  
45  
46  
47  
48  
49  
50  
51  
52  
53  
54  
55  
56  
57  
58  
59  
60

1  
2  
3 408 **Figure 2. Epicurve of the Hoima Outbreak, 2018 with events identified in**  
4  
5 **response to the outbreak**  
6

7  
8 410

9 411

10  
11 412 **Acknowledgements**

12 413 The authors thank the persons and institutions who supported Hoima district OCV monitoring  
13 414 and evaluation study. Special thanks are extended to the research assistants who dedicated  
14 415 their time to meticulously collect the data and the persons who collaborated in the preparation of  
15 416 the different key documents used in this study. We thank the staff, the communities in the study  
16 417 area and the local leadership of Hoima districts for the cooperation during this study. We are  
17 418 grateful to Ambrose Buyinza Wabwire for technical support with drawing of the maps.  
18  
19  
20  
21

22 419

23 420 We thank the Ministry of Health leadership for guidance; the Office of the Prime Minister (OPM)  
24 421 for the permission to access data on the refugee population. We are grateful to the following  
25 422 institutions and bodies; Ministry of Health, Makerere University School of Public Health, World  
26 423 Health Organisation, UNICEF and UNHCR for technical guidance.  
27  
28  
29

30 424 **Footnotes**

31  
32  
33 425 **Contributors:** Conceived and designed the study: GB, MR, WAB, ABS, CGO, DAS.

34 426 Discussed, critically revised and approved the study protocol: GB, MR, WAB, CGO, DAS.

35 427 Performed the research: GB, MR, WAB, AO, FR, IA. Analysed the data: GB, MR, WAB, AO,  
36 428 DAS. Wrote the first draft: GB, MR. Wrote the final DAS. Elaborated, discussed and approved  
37 429 the final version: GB, MR, AB, ABS, AO, FR, IA, CGO, and DAS.  
38  
39  
40

41 430

42 431

43 432 **Funding:** Funding for the study was provided by the Bill and Melinda Gates Foundation  
44 433 (OPP1148763) which provided financial support through the John Hopkins University, Delivery  
45 434 of Oral Cholera Vaccine Effectively (DOVE) project. The funding agency had no role in  
46 435 collecting, analysing or interpreting the results.  
47  
48  
49

50 436

51 437 **Declaration of the conflict of interest**

52 438 The authors have no conflict of interest to declare.  
53  
54  
55

56 439  
57  
58  
59  
60

1  
2  
3 440

4 441 **Additional data sharing:** No additional data available.  
5  
6  
7  
8  
9  
10  
11  
12  
13  
14  
15  
16  
17  
18  
19  
20  
21  
22  
23  
24  
25  
26  
27  
28  
29  
30  
31  
32  
33  
34  
35  
36  
37  
38  
39  
40  
41  
42  
43  
44  
45  
46  
47  
48  
49  
50  
51  
52  
53  
54  
55  
56  
57  
58  
59  
60

For peer review only

442 **REFERENCES**

- 443
- 444 1. Clemens JD, Nair GB, Ahmed T, et al. Cholera. *Lancet* 2017 doi: 10.1016/S0140-
- 445 6736(17)30559-7
- 446 2. Butler T. New developments in the understanding of cholera. *Current gastroenterology*
- 447 *reports* 2001;3(4):315-21. [published Online First: 2001/07/27]
- 448 3. Cholera vaccines: WHO position paper - August 2017. *Wkly Epidemiol Rec* 2017;92(34):477-
- 449 98.
- 450 4. Kirigia JM, Sambo LG, Yokouide A, et al. Economic burden of cholera in the WHO African
- 451 region. *BMC Int Health Hum Rights* 2009;9:8. doi: 10.1186/1472-698X-9-8
- 452 5. Lessler J, Moore SM, Luquero FJ, et al. Mapping the burden of cholera in sub-Saharan Africa
- 453 and implications for control: an analysis of data across geographical scales. *Lancet*
- 454 2018;391(10133):1908-15. doi: 10.1016/S0140-6736(17)33050-7
- 455 6. Bwire G, Ali M, Sack DA, et al. Identifying cholera "hotspots" in Uganda: An analysis of
- 456 cholera surveillance data from 2011 to 2016. *PLoS Negl Trop Dis* 2017;11(12):e0006118.
- 457 doi: 10.1371/journal.pntd.0006118
- 458 7. Cummings MJ, Wamala JF, Eyura M, et al. A cholera outbreak among semi-nomadic
- 459 pastoralists in northeastern Uganda: epidemiology and interventions. *Epidemiology and*
- 460 *infection* 2012;140(8):1376-85. doi: 10.1017/S0950268811001956 [published Online
- 461 First: 2011/09/29]
- 462 8. Bwire G, Mwesawina M, Baluku Y, et al. Cross-Border Cholera Outbreaks in Sub-Saharan
- 463 Africa, the Mystery behind the Silent Illness: What Needs to Be Done? *PLoS One*
- 464 2016;11(6):e0156674. doi: 10.1371/journal.pone.0156674
- 465 9. Bwire G, Malimbo M, Maskery B, et al. The burden of cholera in Uganda. *PLoS Negl Trop Dis*
- 466 2013;7(12):e2545. doi: 10.1371/journal.pntd.0002545
- 467 10. Oguttu DW, Okullo A, Bwire G, et al. Cholera outbreak caused by drinking lake water
- 468 contaminated with human faeces in Kaiso Village, Hoima District, Western Uganda,
- 469 October 2015. *Infect Dis Poverty* 2017;6(1):146. doi: 10.1186/s40249-017-0359-2
- 470 11. Alajo SO, Nakavuma J, Erume J. Cholera in endemic districts in Uganda during El Nino rains:
- 471 2002-2003. *Afr Health Sci* 2006;6(2):93-7. doi: 10.5555/afhs.2006.6.2.93 [published
- 472 Online First: 2006/08/19]
- 473 12. Deployments from the oral cholera vaccine stockpile, 2013-2017. *Wkly Epidemiol Rec*
- 474 2017;92(32):437-42.
- 475 13. Odevall L, Hong D, Digilio L, et al. The Euvichol story - Development and licensure of a safe,
- 476 effective and affordable oral cholera vaccine through global public private partnerships.
- 477 *Vaccine* 2018;36(45):6606-14. doi: 10.1016/j.vaccine.2018.09.026
- 478 14. Bwire G, Munier A, Ouedraogo I, et al. Epidemiology of cholera outbreaks and socio-
- 479 economic characteristics of the communities in the fishing villages of Uganda: 2011-
- 480 2015. *PLoS Negl Trop Dis* 2017;11(3):e0005407. doi: 10.1371/journal.pntd.0005407
- 481 15. Henderson RH, Sundaresan T. Cluster sampling to assess immunization coverage: a review
- 482 of experience with a simplified sampling method. *Bull World Health Organ*
- 483 1982;60(2):253-60.

- 1  
2  
3 484 16. Longini IM, Jr., Nizam A, Ali M, et al. Controlling endemic cholera with oral vaccines. *PLoS*  
4 485 *medicine* 2007;4(11):e336. doi: 10.1371/journal.pmed.0040336 [published Online First:  
5 486 2007/11/30]
- 7 487 17. Sema Baltazar C, Rafael F, Langa JPM, et al. Oral cholera vaccine coverage during a  
8 488 preventive door-to-door mass vaccination campaign in Nampula, Mozambique. *PLoS*  
9 489 *One* 2018;13(10):e0198592. doi: 10.1371/journal.pone.0198592
- 11 490 18. Phares CR, Date K, Travers P, et al. Mass vaccination with a two-dose oral cholera vaccine in  
12 491 a long-standing refugee camp, Thailand. *Vaccine* 2016;34(1):128-33. doi:  
13 492 10.1016/j.vaccine.2015.10.112
- 14 493 19. Khan AI, Khan IA, Siddique SA, et al. Feasibility, coverage and cost of oral cholera  
15 494 vaccination conducted by icddr,b using the existing national immunization service  
16 495 delivery mechanism in rural setting Keraniganj, Bangladesh. *Hum Vaccin Immunother*  
17 496 2019;15(6):1302-09. doi: 10.1080/21645515.2018.1528833
- 19 497 20. Uddin MJ, Wahed T, Saha NC, et al. Coverage and acceptability of cholera vaccine among  
20 498 high-risk population of urban Dhaka, Bangladesh. *Vaccine* 2014;32(43):5690-5. doi:  
21 499 10.1016/j.vaccine.2014.08.021
- 23 500 21. Grandesso F, Rafael F, Chipeta S, et al. Oral cholera vaccination in hard-to-reach  
24 501 communities, Lake Chilwa, Malawi. *Bull World Health Organ* 2018;96(12):817-25. doi:  
25 502 10.2471/BLT.17.206417
- 26 503 22. Sauvageot D, Saussier C, Gobeze A, et al. Oral cholera vaccine coverage in hard-to-reach  
27 504 fishermen communities after two mass Campaigns, Malawi, 2016. *Vaccine*  
28 505 2017;35(38):5194-200. doi: 10.1016/j.vaccine.2017.07.104
- 30 506 23. Massing LA, Aboubakar S, Blake A, et al. Highly targeted cholera vaccination campaigns in  
31 507 urban setting are feasible: The experience in Kalemie, Democratic Republic of Congo.  
32 508 *PLoS Negl Trop Dis* 2018;12(5):e0006369. doi: 10.1371/journal.pntd.0006369
- 34 509 24. Poncin M, Zulu G, Voute C, et al. Implementation research: reactive mass vaccination with  
35 510 single-dose oral cholera vaccine, Zambia. *Bull World Health Organ* 2018;96(2):86-93.  
36 511 doi: 10.2471/BLT.16.189241
- 37 512 25. Parker LA, Rumunu J, Jamet C, et al. Neighborhood-targeted and case-triggered use of a  
38 513 single dose of oral cholera vaccine in an urban setting: Feasibility and vaccine coverage.  
39 514 *PLoS Negl Trop Dis* 2017;11(6):e0005652. doi: 10.1371/journal.pntd.0005652
- 41 515 26. Porta MI, Lenglet A, de Weerd S, et al. Feasibility of a preventive mass vaccination  
42 516 campaign with two doses of oral cholera vaccine during a humanitarian emergency in  
43 517 South Sudan. *Trans R Soc Trop Med Hyg* 2014;108(12):810-5. doi:  
44 518 10.1093/trstmh/tru153
- 46 519 27. Lam E, Al-Tamimi W, Russell SP, et al. Oral Cholera Vaccine Coverage during an Outbreak  
47 520 and Humanitarian Crisis, Iraq, 2015. *Emerg Infect Dis* 2017;23(1):38-45. doi:  
48 521 10.3201/eid2301.160881
- 49 522 28. Tohme RA, Francois J, Wannemuehler K, et al. Oral Cholera Vaccine Coverage, Barriers to  
50 523 Vaccination, and Adverse Events following Vaccination, Haiti, 2013. *Emerg Infect Dis*  
51 524 2015;21(6):984-91. doi: 10.3201/eid2106.141797
- 53 525 29. Luquero FJ, Grout L, Ciglenecki I, et al. First outbreak response using an oral cholera vaccine  
54 526 in Africa: vaccine coverage, acceptability and surveillance of adverse events, Guinea,  
55 527 2012. *PLoS Negl Trop Dis* 2013;7(10):e2465. doi: 10.1371/journal.pntd.0002465

1  
2  
3  
4  
5  
6  
7  
8  
9  
10  
11  
12  
13  
14  
15  
16  
17  
18  
19  
20  
21  
22  
23  
24  
25  
26  
27  
28  
29  
30  
31  
32  
33  
34  
35  
36  
37  
38  
39  
40  
41  
42  
43  
44  
45  
46  
47  
48  
49  
50  
51  
52  
53  
54  
55  
56  
57  
58  
59  
60

528

For peer review only

1  
2  
3  
4  
5  
6  
7  
8  
9  
10  
11  
12  
13  
14  
15  
16  
17  
18  
19  
20  
21  
22  
23  
24  
25  
26  
27  
28  
29  
30  
31  
32  
33  
34  
35  
36  
37  
38  
39  
40  
41  
42  
43  
44  
45  
46  
47  
48  
49  
50  
51  
52  
53  
54  
55  
56  
57  
58  
59  
60

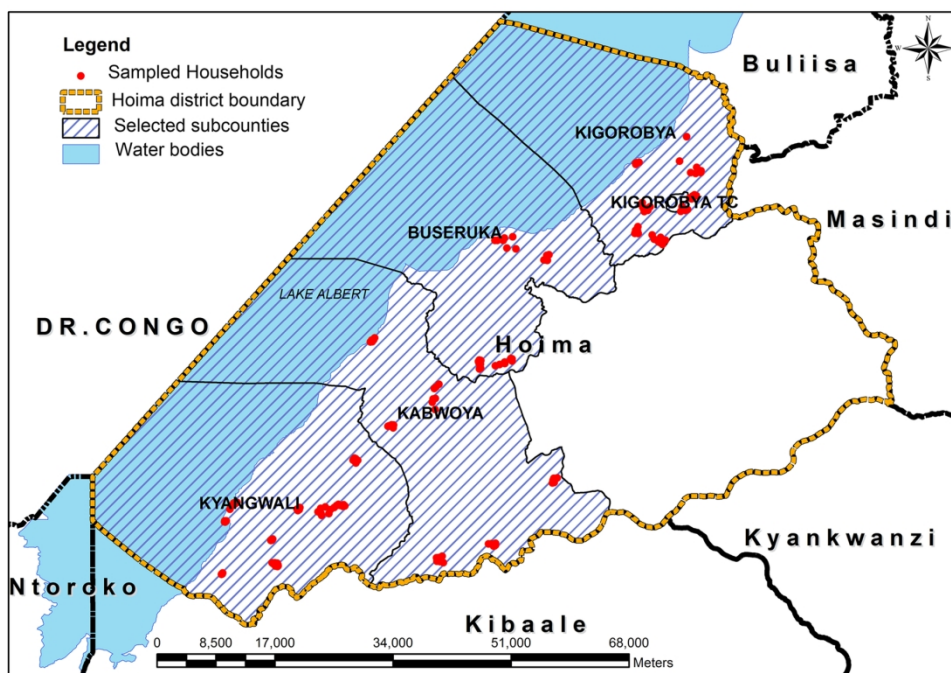

170x119mm (300 x 300 DPI)



1  
2  
3  
4  
5  
6  
7  
8  
9  
10  
11  
12  
13  
14  
15  
16  
17  
18  
19  
20  
21  
22  
23  
24  
25  
26  
27  
28  
29  
30  
31  
32  
33  
34  
35  
36  
37  
38  
39  
40  
41  
42  
43  
44  
45  
46  
47  
48  
49  
50  
51  
52  
53  
54  
55  
56  
57  
58  
59  
60

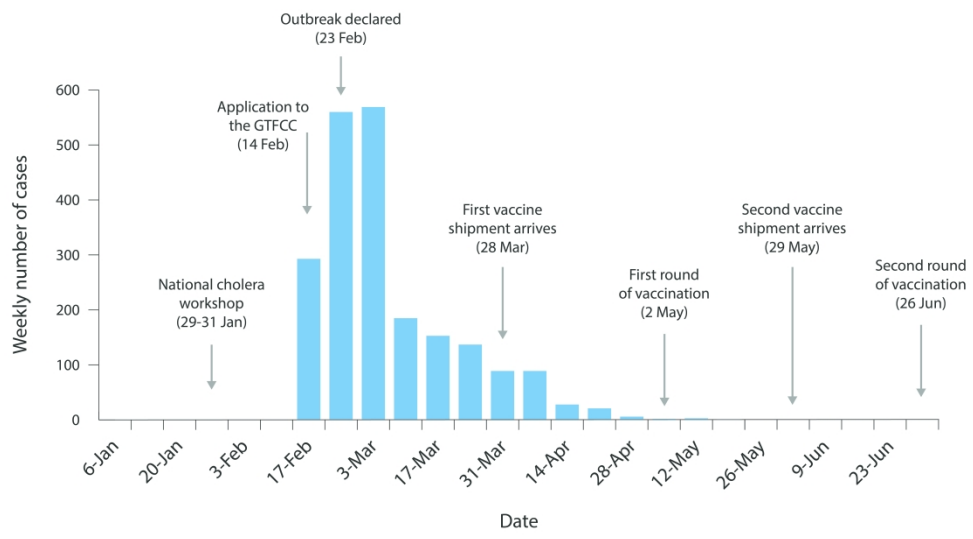

542x305mm (300 x 300 DPI)

# BMJ Open

## Evaluation of an integrated oral cholera vaccine campaign in response to a cholera outbreak in Hoima District, Uganda

|                                 |                                                                                                                                                                                                                                                                                                                                                                                                                                                                                                                                                                                                                                                                                                                                                                                                                          |
|---------------------------------|--------------------------------------------------------------------------------------------------------------------------------------------------------------------------------------------------------------------------------------------------------------------------------------------------------------------------------------------------------------------------------------------------------------------------------------------------------------------------------------------------------------------------------------------------------------------------------------------------------------------------------------------------------------------------------------------------------------------------------------------------------------------------------------------------------------------------|
| Journal:                        | <i>BMJ Open</i>                                                                                                                                                                                                                                                                                                                                                                                                                                                                                                                                                                                                                                                                                                                                                                                                          |
| Manuscript ID                   | bmjopen-2020-038464.R1                                                                                                                                                                                                                                                                                                                                                                                                                                                                                                                                                                                                                                                                                                                                                                                                   |
| Article Type:                   | Original research                                                                                                                                                                                                                                                                                                                                                                                                                                                                                                                                                                                                                                                                                                                                                                                                        |
| Date Submitted by the Author:   | 05-Oct-2020                                                                                                                                                                                                                                                                                                                                                                                                                                                                                                                                                                                                                                                                                                                                                                                                              |
| Complete List of Authors:       | Bwire, Godfrey; Republic of Uganda Ministry of Health, Community Health<br>Roskosky, Mellisa; Johns Hopkins University Bloomberg School of Public Health, International Health<br>Ballard, Anne; Johns Hopkins University Bloomberg School of Public Health, Center for Communications Programs<br>Brooks, W; Johns Hopkins University Bloomberg School of Public Health, International Health<br>Alfred, Okello; Makerere University College of Health Sciences<br>Rafael, Florentina; World Health Organization, Infectious Hazard Management<br>Ampeire, Immaculate; Republic of Uganda Ministry of Health, Expanded Programme on Immunization<br>Orach, Christopher; Makerere University College of Health Sciences<br>Sack, David; Johns Hopkins University Bloomberg School of Public Health, International Health |
| <b>Primary Subject Heading</b>: | Global health                                                                                                                                                                                                                                                                                                                                                                                                                                                                                                                                                                                                                                                                                                                                                                                                            |
| Secondary Subject Heading:      | Epidemiology, Health services research, Infectious diseases, Public health                                                                                                                                                                                                                                                                                                                                                                                                                                                                                                                                                                                                                                                                                                                                               |
| Keywords:                       | Gastrointestinal infections < GASTROENTEROLOGY, International health services < HEALTH SERVICES ADMINISTRATION & MANAGEMENT, Epidemiology < INFECTIOUS DISEASES, Infection control < INFECTIOUS DISEASES, Public health < INFECTIOUS DISEASES, Tropical medicine < INFECTIOUS DISEASES                                                                                                                                                                                                                                                                                                                                                                                                                                                                                                                                   |
|                                 |                                                                                                                                                                                                                                                                                                                                                                                                                                                                                                                                                                                                                                                                                                                                                                                                                          |

SCHOLARONE™  
Manuscripts



I, the Submitting Author has the right to grant and does grant on behalf of all authors of the Work (as defined in the below author licence), an exclusive licence and/or a non-exclusive licence for contributions from authors who are: i) UK Crown employees; ii) where BMJ has agreed a CC-BY licence shall apply, and/or iii) in accordance with the terms applicable for US Federal Government officers or employees acting as part of their official duties; on a worldwide, perpetual, irrevocable, royalty-free basis to BMJ Publishing Group Ltd ("BMJ") its licensees and where the relevant Journal is co-owned by BMJ to the co-owners of the Journal, to publish the Work in this journal and any other BMJ products and to exploit all rights, as set out in our [licence](#).

The Submitting Author accepts and understands that any supply made under these terms is made by BMJ to the Submitting Author unless you are acting as an employee on behalf of your employer or a postgraduate student of an affiliated institution which is paying any applicable article publishing charge ("APC") for Open Access articles. Where the Submitting Author wishes to make the Work available on an Open Access basis (and intends to pay the relevant APC), the terms of reuse of such Open Access shall be governed by a Creative Commons licence – details of these licences and which [Creative Commons](#) licence will apply to this Work are set out in our licence referred to above.

Other than as permitted in any relevant BMJ Author's Self Archiving Policies, I confirm this Work has not been accepted for publication elsewhere, is not being considered for publication elsewhere and does not duplicate material already published. I confirm all authors consent to publication of this Work and authorise the granting of this licence.

1  
2  
3 1 **Evaluation of an integrated oral cholera vaccine campaign in response to a cholera outbreak**  
4  
5 2 **in Hoima District, Uganda**

6  
7 3 *Godfrey Bwire<sup>1</sup>, Mellisa Roskosky<sup>2</sup>, Anne Ballard Sara<sup>2</sup>, W. Abdullah Brooks<sup>2</sup>, Alfred Okello<sup>3</sup>,*  
8 4 *Florentina Rafael<sup>4</sup>, Immaculate Ampeire<sup>5</sup>, Christopher Garimoi Orach<sup>3</sup>, David A. Sack<sup>2</sup>.*  
9

10  
11  
12 6 **Authors' affiliations:**

- 13 7 1. Ministry of Health, Department of Community Health, Kampala Uganda.  
14  
15 8 2. Johns Hopkins Bloomberg School of Public Health, Department of International Health,  
16 9 Baltimore, Maryland USA.  
17  
18 10 3. Makerere University, College of Health Sciences, Kampala, Uganda.  
19  
20 11 4. World Health Organization, Department of Infectious Hazard Management, Geneva,  
21 12 Switzerland.  
22  
23 13 5. Ministry of Health, Uganda National Expanded Program on Immunization  
24  
25  
26  
27

28 16 \*Corresponding author.

29 17 Professor David A. Sack, M, D.

30 18 Johns Hopkins Bloomberg School of Public Health

31 19 615 North Wolfe Street

32 20 Baltimore, Maryland 21205 USA

33 21 Phone +1 443 287 8795

34 22 Email: [dsack1@jhu.edu](mailto:dsack1@jhu.edu)

35 23 Number of words (Excluding abstract): 4,586

36 24 Number of words in abstract: 258

37 25 Number of tables: 4

38 26 Number of figures: 2

39 27 Number of references: 33

40 28 Number of supplemental materials: 0

41 29  
42 30 Key words: cholera, vaccination, Uganda, monitoring, coverage, outbreak, sub-Saharan Africa,  
43 31 oral cholera vaccine, Vaccine campaign  
44  
45  
46  
47  
48  
49  
50  
51  
52  
53  
54  
55  
56  
57  
58  
59  
60

1  
2  
3 32 **ABSTRACT**

4 33 **Objectives** To evaluate the quality and coverage of the campaign to distribute oral cholera  
5 34 vaccine during a cholera outbreak in Hoima, Uganda to guide future campaigns of cholera  
6 35 vaccine.

7  
8  
9 36 **Design** Survey of communities targeted for vaccination to determine vaccine coverage rates  
10 37 and perceptions of the vaccination campaign, and a separate survey of vaccine staff who  
11 38 carried out the campaign.

12  
13  
14 39 **Setting** Hoima District, Uganda.

15  
16 40 **Participants** Representative clusters of households residing in the communities targeted for  
17 41 vaccination and staff members who conducted the vaccine campaign.

18  
19 42 **Results** Among 209 households (1,274 individuals) included in the coverage survey, 1193  
20 43 (94%) reported receiving at least one OCV dose and 998 (78%) reported receiving two doses.  
21 44 Among vaccinated individuals, minor complaints were reported by 71 persons (5.6%).  
22 45 Individuals with 'some' education (primary school or above) were more knowledgeable  
23 46 regarding the required OCV doses compared to non-educated (p value = 0.03). Factors  
24 47 negatively associated with campaign implementation included community sensitisation time,  
25 48 staff payment, and problems with field transport. Although the campaign was carried out quickly,  
26 49 the outbreak was over before the campaign started. Most staff involved in the campaign (93%)  
27 50 were knowledgeable about cholera control; however, 29% did not clearly understand how to  
28 51 detect and manage adverse events following immunization.

29  
30 52 **Conclusion** The campaign achieved high OCV coverage, but the surveys provided insights for  
31 53 improvement. To achieve high vaccine coverage, more effort is needed for community  
32 54 sensitisation, and additional resources for staff transportation and timely payment for campaign  
33 55 staff is required. Pre and post-test assessment of staff training can identify and address  
34 56 knowledge and skill gaps.

35  
36  
37  
38  
39  
40  
41  
42  
43  
44 58

1  
2  
3 **59 Strengths and limitations of this study**  
4

- 5 60 • The cluster survey of households in communities targeted for vaccination efficiently  
6 61 documented actual coverage in the target population.  
7  
8 62 • The household surveys were able to identify constraints to the campaign, especially in less  
9 63 educated subgroups  
10  
11 64 • The household surveys identified mild adverse events not detected by routine AEFI  
12 65 surveillance (Adverse Events Following Immunization) during the campaign. Understanding  
13 66 these perceived AEFIs should be recognized to ensure good communications between  
14 67 communities and health officials.  
15  
16 68 • Evaluation of the vaccination staff immediately following each round identified ways to  
17 69 improve performance in the next round.  
18  
19 70 • Monitoring and evaluation of the oral cholera vaccination campaign in Hoima district was  
20 71 useful to guide future cholera prevention activities since the campaign was the first of its  
21 72 kind. in Uganda.  
22  
23  
24  
25  
26 73

## 74 INTRODUCTION

75 Cholera, a preventable and treatable disease is characterized by profuse watery diarrhoea  
76 caused by infection of the intestine with the bacterium *Vibrio cholerae*.<sup>1</sup> Cholera is a major  
77 cause of morbidity and mortality in several countries in sub-Saharan Africa where cholera  
78 outbreaks also negatively affect development due to associated high economic burden.<sup>2 3</sup>  
79 Between 2010 and 2016 an average 141,918 incident cases annually were reported from sub-  
80 Saharan African countries, including Uganda.<sup>4</sup> In Uganda, cholera outbreaks occurred as both  
81 endemic and epidemic disease. Epidemic disease occurred in northern and eastern Uganda  
82 districts<sup>5</sup> and are thought to be worsened by contamination of water due to poor sanitation.<sup>6</sup>  
83 Cholera outbreaks especially occur in districts along the international borders with the  
84 Democratic Republic of the Congo (DR Congo), South Sudan and Kenya and along the Great  
85 Lakes.<sup>5 7</sup> These districts include Hoima, where cholera is endemic.<sup>5 8-10</sup>

86  
87 There has been debate in the public health community on best practices for endemic and  
88 epidemic cholera disease control, with some preferring to focus on WASH interventions, and  
89 others advocating for OCV for both endemic and epidemic disease control.<sup>11</sup> In part, this has  
90 been facilitated by a relative lack of experience with OCV and concern that excess reliance on  
91 vaccine might negatively affect essential infrastructural development and hygienic practices.  
92 The World Health Organization (WHO) recommends an integrated approach to cholera  
93 prevention where water, sanitation and hygiene (WaSH) interventions are complemented by  
94 vaccine campaigns which provide oral cholera vaccine (OCV) to persons living in areas  
95 considered high risk.<sup>2 12</sup> These vaccine campaigns may be either preventive, in which the  
96 vaccine is targeted to cholera hotspots, or reactive in which the campaign is implemented in  
97 response to an outbreak or a humanitarian emergency.<sup>13</sup>

98  
99 Two WHO-prequalified currently OCVs are available from the global stockpile: Shanchol  
100 (Shantha Biotechnics Limited, India) and Euvichol (Eubiologics Co., Ltd., Korea).<sup>2</sup> The standard  
101 immunization schedule consists of two doses given at an interval of at least two weeks to all  
102 persons in the target area above one year of age. While there is increasing use of OCV to  
103 control outbreaks, preventive use is constrained due to inadequate vaccine supply.<sup>14</sup> Since  
104 creation of a global OCV stockpile in July, 2013, several OCV campaigns had been successfully  
105 implemented<sup>13 14</sup> but it is still important to document national campaign experiences as well as  
106 monitoring and evaluation activities, to continually improve the effectiveness and efficiency of  
107 vaccine campaigns.

1  
2  
3 108 The Ugandan Ministry of Health (MoH) had prepared plans for OCV campaigns in the areas  
4 109 identified as cholera hotspots starting in the western districts of Uganda (including Hoima), near  
5 110 the border with DR Congo and close to, or adjoining Lake Albert. These hotspot districts and  
6 111 their specified sub-counties were confirmed during a national cholera workshop in Kampala on  
7 112 29-31 January 2018. This workshop led to the development of an application for OCV to the  
8 113 Global Taskforce for Cholera Control (GTFCC) which was submitted on 14 February 2018. The  
9 114 application proposed providing OCV in these identified hotspots as a preventive strategy.  
10 115 However, while preparations for these campaigns were underway, an outbreak was declared in  
11 116 Hoima district on 23 February 2018. The earliest cases were identified among DR Congo  
12 117 refugees, but then other cases were seen among the non-refugee Ugandan population. The  
13 118 MoH responded to the outbreak with multisectoral interventions, including proper case  
14 119 management, promotion of access to safe water and improved sanitation (WaSH), enhanced  
15 120 cholera surveillance, as well as infection control and health education. These measures were  
16 121 then supplemented with plans for an emergency OCV campaign. Thus, the original plans for a  
17 122 preventive OCV campaign were shifted to an emergency response to control the outbreak. The  
18 123 first doses of vaccine arrived on 28 March and the first round of vaccinations started on 2 May.  
19 124 The doses for the second round arrived on 29 May and the second round started on 26 June. A  
20 125 door-to-door strategy was used to deliver two doses of vaccine to an estimated 360,000 people,  
21 126 including pregnant women, over the age of one year residing in the four targeted sub-counties.  
22 127 To carry out the campaign, the MoH organized all activities including logistics, community  
23 128 mobilisation and implementation, coordinating ground activities through an assigned point  
24 129 person. Many stakeholders contributed to the campaign including the Hoima district local  
25 130 government, WHO, UNICEF, UNHCR and Médecins sans Frontiers (MSF). Prior to the  
26 131 campaign, the stakeholders met to define and coordinate their complementary tasks.  
27 132 The epidemic curve based on a line list of cases and deaths by date and stated nationality is  
28 133 shown on Figure 1. Over the course of the outbreak, 2,122 cases with 44 deaths (case fatality  
29 134 rate, 2.1%) were reported. Sixty six percent (1,410) of the cases and 64% (28) of the deaths  
30 135 occurred during the first two weeks of the outbreak. Many of the cases and deaths (1276 and  
31 136 32, or 60% and 73%, respectively) occurred among persons who were from DR Congo, and the  
32 137 refugees developed cholera symptoms soon after arrival in Uganda. Among the 44 deaths  
33 138 reported, 25 (57%) occurred in the community, not in the health facility. Nineteen of the fatal  
34 139 cases were treated at the health facility; the case fatality ratio (CFR) for facility-treated patients  
35 140 was 0.9%. Although the emergency vaccination campaign intended to control the outbreak,



1  
2  
3 141 because the outbreak was so sudden and so short-lived, the campaign could only be initiated  
4  
5 142 after the outbreak had already declined.

6 143 *Rationale.* While vaccines are commonly used in Uganda, especially through the longstanding  
7  
8 144 EPI program (Expanded Programme on Immunization), this was the first OCV use in Uganda,  
9  
10 145 and there was no prior experience to guide responders and implementers. Thus, this study was  
11  
12 146 carried out with the aim to document campaign activities and to monitor and evaluate its  
13  
14 147 procedures and outcomes that could guide future OCV campaigns. The issues addressed  
15  
16 148 during this study included the knowledge and practices of the campaign staff, vaccine coverage  
17  
18 149 in the targeted areas, and the knowledge and practices of the community. After this initial  
19  
20 150 campaign, the MoH continued its plans for preventive campaigns in the remaining cholera  
21  
22 151 hotspot districts, informed by the lessons learned from this initial emergency use campaign. In  
23  
24 152 an effort to document the impact of OCV on an outbreak in a setting with endemic disease, we  
25  
26 153 undertook this monitoring and evaluation exercise, as described below.

## 25 154 26 155 **MATERIALS AND METHODS**

27 156 *Study setting.* Hoima district is located in western Uganda, across Lake Albert from DR Congo.  
28  
29 157 It has a total area of 5735.5 square kilometres and a projected population of 630,000 persons  
30  
31 158 (2018). The district consists of 13 administrative units as follows: 10 sub-counties  
32  
33 159 (Kyabigambire, Buhimba, Kyangwali, Kabwoya, Bugambe, Kiziranfumbi, Kitoba, Kigorobyia,  
34  
35 160 Buseruka and Buhanka), a municipality (Hoima municipality) and two town councils (Kigorobyia  
36  
37 161 and Buhima town councils). The major economic activities of the population in Hoima are  
38  
39 162 subsistence agriculture and fishing. Cholera is endemic in the district but the endemicity is  
40  
41 163 localised in some specific sub-counties particularly those with fishing communities.<sup>15</sup> The sub-  
42  
43 164 counties targeted for OCV included Buseruka, Kabwoya, Kangwali, and Kigorobyia which  
44  
45 165 together constitute the six administrative units of Kyangwali, Kigorobyia, Kabwoya Buseruka,  
46  
47 166 Kigorobyia town council and Kyangwali refugee settlement (Old and New) as shown in Figure 2.

48 167  
49 168 *Population and design for the Monitoring and Evaluation of the OCV Campaign.* Two sub-  
50  
51 169 studies were conducted to assess different aspects of the campaign. In sub-study one, a  
52  
53 170 representative sample of the population that was targeted for vaccination was questioned to  
54  
55 171 determine vaccine coverage rates, detect adverse events following immunization (AEFI) and  
56  
57 172 collect additional information from the communities about the vaccine campaign. Sub-study two  
58  
59 173 consisted of a survey among the campaign staff who participated in the OCV campaign after  
60  
174 each round to assess their knowledge and practices.

1  
2  
3 175 *Sub-study 1, community assessment.* Sub-study one was a survey conducted in the vaccine  
4 176 target area, consisting of 31 clusters, each cluster consisting of 4 to 7 households per cluster.  
5  
6 177 The study population included each person > one year of age who was living in the OCV  
7  
8 178 targeted area at the time of the vaccination campaign. We assumed a household size of five  
9  
10 179 persons based on estimates from a Demographic Health Survey conducted in 2016.<sup>16</sup> The  
11  
12 180 sample was increased in order to raise the analytical power and precision of the surveys and to  
13  
14 181 allow for separate analysis by gender. The formula used for determining sample size was,  $n =$   
15  
16 182  $(z^2pq)/d^2$ ,<sup>17</sup> where 'n' is the number of people desired for the survey, 'd' is the precision of the  
17  
18 183 result, 'z' is the confidence limit, and 'p' and 'q' correspond to the proportion of persons in the  
19  
20 184 population who are immunised and not immunised, respectively. We chose to use a low  
21  
22 185 coverage of 50%. To identify the clusters, a list of villages was obtained from each of the four  
23  
24 186 sub-counties targeted for vaccination. From these lists, the Excel random number generator  
25  
26 187 (=RANDBETWEENBETWEENBOTTOM, TOP) was used to select the 31 villages from which households  
27  
28 188 were selected. From each selected village a list of households was obtained from village  
29  
30 189 administrative leader (Local Council (LC) – 1: is the smallest recognised administrative unit in  
31  
32 190 Uganda. It is headed an elected leader called LC-1) and used to identify the household by  
33  
34 191 random selection similar to that used to select the villages or clusters. The sub-county  
35  
36 192 population was obtained from the district planning unit and used to compute the number of  
37  
38 193 households for each sub county as indicated in Table 1. The number of villages selected in  
39  
40 194 each sub-county was in proportion to the population of the sub-county.  
41  
42 195

43 196 For the household interviews, data were collected through standardized questionnaires during  
44  
45 197 face-to-face interviews conducted by trained research assistants using the local language.  
46  
47 198 Within a selected household the questionnaires were administered to the key respondents  
48  
49 199 (head of the HHs), who represented the entire household and provided information about each  
50  
51 200 member of the household. If a suitable key respondent was absent, additional visits were  
52  
53 201 scheduled. In two households, a person could not be located, and the household was dropped.  
54  
55 202 For each vaccinated person, the research assistants assessed cholera immunization status.  
56  
57 203 Vaccination status was ascertained in two ways: either the informant verbally indicated that the  
58  
59 204 individual had received the dose of vaccine or the vaccination was recorded on the vaccine  
60  
205 card. If the informant did not have a vaccine card, the reliability of the vaccination information  
206  
was validated by asking about the details of the procedures of the vaccination (e.g. being given

1  
2  
3 207 recently by mouth to all persons > 1 year of age). None of the residents who were approached  
4  
5 208 refused to answer the survey.

6 209  
7  
8 210 *Adverse Events Following Immunization (AEFI)*. The occurrence of AEFIs were assessed by  
9  
10 211 asking for symptoms among the vaccine recipients following vaccination. As part of the  
11 212 campaign itself, a routine system for AEFI detection was established in which the vaccine team  
12 213 members advised vaccinees to report to a health worker or to seek care at a health facility if  
13 214 they experienced symptoms following immunization. By contrast, the AEFI surveillance in this  
14 215 sub-study asked the participants who participated in the cluster survey about symptoms they  
15 216 may have experienced. This AEFI sub-study was thus, designed to enhance our understanding  
16 217 of potential AEFIs which may not have been reported through the routine AEFI surveillance.  
17  
18  
19  
20  
21

22 218  
23 219 AEFIs were categorised for each individual member of the household who received a dose of  
24 220 OCV as follows. They were considered mild if the symptoms did not interfere with normal  
25 221 activities; moderate if they interfered somewhat; and severe if the symptoms prevented the  
26 222 individual from continuing normal activities.<sup>18</sup> Persons who reported to be having ongoing  
27 223 symptoms > 72 hours were advised to visit the nearest health facility for more care. Among  
28 224 those reporting symptoms, information was recorded as to whether the person took any  
29 225 medicine or received any treatment to lessen the symptoms.  
30  
31  
32  
33  
34

35 226  
36 227 *Data collection and analysis*. Data from the community surveys were collected by tablet  
37 228 computers using *Kobo Collect* (<https://www.kobotoolbox.org/>) installed to record the responses  
38 229 in the field. Data were cleaned, coded, and stored in Stata Version 14. Data were analysed to  
39 230 generate frequencies, percentages or proportions and means. Comparisons between groups  
40 231 was done via logistic regression for the calculation of odds ratios and 95% confidence intervals.  
41 232 The results of analysis were presented in the form of graphs, tables, charts, and means and  
42 233 were included in interim and end of campaign reports.  
43  
44  
45  
46  
47

48 234  
49 235 *Quality Assurance*. Research assistants were trained on data collection methods and were able  
50 236 to consult field supervisors and the principal investigator on any issue that was not clear to  
51 237 them. For quality assurance, the survey supervisors revisited about 10% of the households, not  
52 238 to collect the data again, but to ensure that they were not skipped by the interviewers for eligible  
53 239 respondents. The surveys were conducted about two weeks after completion of the second  
54 240 round of the vaccination campaign to minimize recall bias.  
55  
56  
57  
58  
59  
60

1  
2  
3 241  
4  
5 242 *Sub-study 2, staff assessment.* Staff were assessed on their level of knowledge on the cause of  
6 243 cholera, the importance of safe water in cholera prevention, the target age group for cholera  
7  
8 244 vaccination, and knowledge about AEFI and the procedures for care should subjects experience  
9  
10 245 an AEFI. Staff were surveyed twice with each survey taking place within two weeks after  
11 246 administration of the first and second OCV rounds, respectively. All staff who participated  
12  
13 247 directly by administering the vaccines or indirectly through supervisory roles and who were  
14 248 present at the workstation during the study period were enrolled in the survey. For the staff  
15  
16 249 survey, structured questions were administered on paper questionnaires that allowed for adding  
17 250 text to explain the answers (open-ended questions). Most of the vaccine staff had taken part in  
18  
19 251 other public health campaigns, but none had participated earlier with a campaign to distribute  
20  
21 252 OCV.

22  
23 253 *Ethical Considerations.* This study was conducted as part of the routine MoH operational  
24 254 research for improvement of health services; however, ethical issues were considered and  
25  
26 255 addressed. The proposal was approved by the Makerere University School of Public Health  
27 256 Institutional Review Board (MaKSPH IRB) (no 610 in 2018) and Uganda National Council of  
28  
29 257 Science and Technology. Written informed consent was obtained from all participants in both  
30  
31 258 sub-studies. Participation in the study was voluntary and respondents were free to opt out at  
32  
33 259 any stage of the interviews.

34 260 Confidentiality was observed at all stages of the study. No names or personal identifiers were  
35  
36 261 included on the questionnaires. The research assistants underwent training on interview  
37 262 techniques, neutrality, and research ethics. The benefits of the study to the staff included the  
38  
39 263 ability to express themselves, provide feedback and observations that in turn might lead to  
40  
41 264 improvements in supportive services for their training and work.

42 265  
43  
44 266 *Patient and Public Involvement.* This research was done without research subject  
45  
46 267 involvement. The time was inadequate to involve the subjects prior to the vaccine campaign.  
47 268 They were also not invited to contribute to the writing or editing of this document for readability  
48  
49 269 or accuracy. However, the findings of the study were disseminated to the Hoima district  
50  
51 270 administration, MoH and other policymakers to use them to strengthen health service  
52  
53 271 interventions and future OCV campaigns.

54 272

## 55 273 **RESULTS**

1  
2  
3 274 *Sub-study One, community survey results.* The community surveys were carried out in the four  
4 275 sub-counties in Hoima districts of Buseruka, Kabwoya, Kyangwali and Kigorobyas as shown in  
5 276 Figure 2 and Table 1. [Insert Figure 2 and Table 1] A total of 209 households, including 1,274  
6 277 individuals, were surveyed. Most (96%) of the respondents were household heads or their  
7 278 spouses. All respondents confirmed that they were living in the targeted OCV area at the time of  
8 279 the campaign. Fifty-one (51%) of the respondents had primary education, 17% had secondary  
9 280 education, 1% had tertiary education, and the remaining 31% had no education. The  
10 281 respondents were aged 18 – 89 years with a mean age of 40 years. Both sexes were present,  
11 282 with no statistically significant difference.

12 283 By verbal reports, 94% of the residents received at least one dose and 78% received two doses  
13 284 of OCV. From verbal reporting, 91% of residents received vaccine during the first round and  
14 285 81% received vaccine during the second round. For many of the households, a vaccine card  
15 286 was available, and the vaccination card was used to confirm vaccination status. Using  
16 287 information from the card only, coverage was 84% and 65% for round one and round two  
17 288 respectively and the two-dose coverage was 62% (95%CI: 59.4-64.9). Coverage rates are  
18 289 shown on Table 2. [Insert Table 2]

19 290  
20 291 Among those who did not receive a dose of vaccine, over half of these missed doses (254 of the  
21 292 357 missed doses during the two rounds) were because the person was not at home at the time  
22 293 of vaccination or was out of town. In a few cases, the vaccine team missed the household,  
23 294 accounting for 53 missed doses. Refusing to take vaccine was not reported.

24 295  
25 296 *Reported AEFIs.* Overall, 71 individuals of 1,274 respondents (5.6%) reported an AEFI (Table  
26 297 3). Determining a causal relation between the vaccination and the reported symptoms was not  
27 298 attempted. [Insert Table 3]

28 299  
29 300 Most AEFIs were considered mild or moderate, but 8 (0.6%) persons reported an AEFI as  
30 301 severe. Most (60%) of the persons reporting an AEFI did not seek treatment including 60% of  
31 302 those reporting a severe AEFI. 29.6% of the reported adverse events occurred in the first round,  
32 303 40.9% in the second round and 29.6% in both rounds. The most common symptoms were  
33 304 abdominal pain (15), diarrhoea, (9), fever, nausea, and headache (each 6) reports. Table 4  
34 305 provides additional information on the AEFIs. The reported AEFIs were infrequent relative to the  
35 306 number of doses distributed and there were no serious adverse events reported. [Insert Table4]

36 307

### 308 **Community knowledge of oral cholera vaccines.**

309 A majority (77%) of the respondents understood that vaccine was one of the ways to prevent  
310 cholera. There was a statistically significant association between education level and knowledge  
311 about OCV with those having at least a primary school education being almost twice as likely to  
312 know the number of required doses as compared to those with no education (OR 1.90, 95% CI  
313 1.06, 3.44 [P = 0.03].

314 *Sub-study Two, staff survey.* A total of 242 and 125 staff responded to the first and second  
315 knowledge and practice (KP) surveys (KP1 and KP2). Most respondents were vaccination team  
316 members (89% and 87% in vaccine rounds 1 and 2, respectively). Almost all the respondents  
317 were knowledgeable about the cause of cholera, the importance of safe water in cholera  
318 prevention and the vaccine target group, but were less knowledgeable regarding potential  
319 adverse events following administration (AEFI) or how to advise vaccinees, with 29% and 16%  
320 being less informed about AEFI during the first and second surveys.

321 When staff were asked to suggest areas that needed improvement in future OCV campaigns,  
322 more than 10% suggested more timely payment of allowances, more time to sensitize and  
323 inform the communities on the benefits of the vaccine, and better transportation and facilitation  
324 allowances (payments to health workers to cover the cost they incurred when administering the  
325 vaccines or conducting activities related to the OCV campaign). Other suggestions included  
326 use of both static and mobile vaccination points, provision of gumboots, umbrellas, and more  
327 areas for vaccine storage in sub-counties where vaccine would be more accessible, more  
328 workers for hard to reach areas, and an increase in the number of vaccine days to complete the  
329 vaccinations and increase coverage.

330

## 331 **DISCUSSION**

332 The results of this monitoring and evaluation exercise documented important findings on the  
333 OCV campaign, the knowledge and practices of both the community and the health staff  
334 involved in the campaign and implications for the conduct of future OCV campaigns as part of  
335 an integrated cholera control strategy. These findings suggest that the OCV campaign in Hoima  
336 successfully provided the vaccine to a very large proportion of the target population in Hoima  
337 district, western Uganda. Approximately 93.6% of respondents reported receiving at least one  
338 dose and 78.3% reported receiving two doses among residents. Given the mobile and transient  
339 nature of this population, this was noteworthy, and suggests that even better coverage may be  
340 possible for more settled populations in Uganda.

1  
2  
3 341 Since this was the first such campaign with OCV, there was concern that the population might  
4 342 be reluctant to accept it. This is a vaccine with which they were not familiar, it was given orally  
5 343 to all ages rather by injection to children, and two doses were required. Despite these potential  
6 344 constraints, we found that most people accepted taking the vaccine readily; however, some  
7 345 were not at home resulting in missed vaccinations.

8 346  
9  
10  
11 347 High vaccination coverage is especially important when one is attempting to achieve herd  
12 348 protection. Since it is estimated that herd protection can be achieved with a coverage even  
13 349 lower than 90%;<sup>19</sup> the high coverage achieved in this campaign would be expected to induce  
14 350 significant indirect protection even among those who did not receive vaccine.<sup>19 20</sup>

15 351  
16 352 It was noted in the administrative report from the MoH and during a stakeholder's meeting that  
17 353 one of the reasons for the reduction in the coverage during the second OCV dose was the  
18 354 unpredictable campaign dates for the second round. The vaccine for the second round had to  
19 355 be shipped and cleared through customs, and the timing for this was not certain. To avoid this  
20 356 problem in the future, a mechanism needs to be established to provide a better timeline for  
21 357 receipt of the vaccine shipments.

22 358  
23 359 *Community Reception to OCV.* As with previous OCV campaigns outside Uganda, very few  
24 360 AEFI were reported.<sup>21 22</sup> Most of adverse events were considered mild or moderate and were  
25 361 self-limited. Despite the low prevalence of AEFI, the survey exposed the need to better inform  
26 362 the community about seeking treatment for more severe adverse events or for those that do not  
27 363 quickly resolve. This was especially true for families with little education who were less likely to  
28 364 seek medical attention for severe AEFI (data not shown). Notably, members in the community  
29 365 demonstrated good understanding of the rationale for the vaccine; however, a key takeaway  
30 366 from the survey was a need to better communicate the number of required doses, given that  
31 367 those with more education were twice as likely than those with no education to know the  
32 368 number of doses needed.

33 369  
34 370 *Staff Reception to OCV.* Inclusion of staff KP survey contributed to the success of the project  
35 371 by identifying gaps among the staff knowledge and performance. Questioning the vaccine staff  
36 372 about their training and their experience in the field is not a common activity when conducting  
37 373 monitoring and evaluation activities during OCV campaigns. Many people had to be mobilized  
38 374 quickly and these were the key people who interacted with the communities. It was important

1  
2  
3 375 that the staff accurately represent the campaign as an integrated cholera prevention program,  
4 376 but this was the first time these people carried out this role. The MoH felt it important to monitor  
5 377 their knowledge and behaviors as well as any constraints they felt in carrying out their functions.  
6 378 While they were generally knowledgeable about the disease and about the vaccine, these staff  
7 379 needed additional training regarding recognizing and managing AEFIs. They also faced  
8 380 challenges regarding logistical support. After the first staff KP survey, these gaps were  
9 381 communicated to the MoH so that appropriate actions could be taken to ensure that these gaps  
10 382 were addressed prior to the second round.  
11  
12  
13  
14  
15

16 383  
17 384 Most other OCV campaigns have also reported high coverage rates. These have included  
18 385 reports from Bangladesh<sup>23 24</sup>, Malawi<sup>25 26</sup>, Mozambique<sup>21</sup>, Democratic Republic of Congo <sup>27</sup>,  
19 386 Zambia <sup>28</sup>, South Sudan <sup>29 30</sup>, Iraq<sup>31</sup>, Haiti<sup>32</sup>, and Guinea <sup>33</sup>. Clearly, OCV is well accepted  
20 387 among these very diverse population groups where the vaccine campaigns have been carried  
21 388 out.  
22  
23  
24  
25

26 389  
27 390 Important limitations of this study need to be mentioned. Ideally, one would prefer to conduct  
28 391 community studies prior to a campaign to understand knowledge and attitudes about cholera to  
29 392 improve communications regarding the upcoming campaign as part of an integrated strategy to  
30 393 control cholera. However, since the campaign was carried out on an emergency basis during an  
31 394 outbreak, a study prior to the campaign was not possible. Secondly, a community survey  
32 395 immediately after the first round might have provided feedback to the teams that would have  
33 396 improved the coverage for the second round. It should also be noted that a single informant  
34 397 provided information about receipt of the vaccine for all members of the household, so this  
35 398 informant might have incorrect information concerning one or more members of the household;  
36 399 however, since the vaccine was directly given to the household members together, it seems that  
37 400 inaccuracies would be minimal. The community KP survey did not include questions on attitudes  
38 401 regarding cholera. Since the survey had to be carried out very quickly following the campaign,  
39 402 and since the survey was targeted to identify issues that would be immediately relevant to  
40 403 campaign performance, it was felt that understanding attitudes regarding cholera, even though  
41 404 important, would have required other qualitative methods requiring more time than was  
42 405 available. Similarly, direct observation of the training and coordination meetings would have  
43 406 been useful to independently assess the efficiency and effectiveness of these training and  
44 407 coordination meetings. Furthermore, there was no list of all workers in the campaign and many  
45 408 of the workers who participated in the second round had left prior to administering the  
46  
47  
48  
49  
50  
51  
52  
53  
54  
55  
56  
57  
58  
59  
60



1  
2  
3 409 questionnaire; thus, there were fewer respondents in the second round and the proportion of all  
4 410 workers who participated could not be determined precisely. Finally, it was not possible, given  
5 411 the time constraints, to fully integrate WASH interventions together with the OCV campaign, or  
6 412 to monitor and evaluate community and staff responsiveness to such integration.  
7  
8  
9

10 413  
11 414 In this outbreak 2,122 cholera cases and 44 deaths were reported, nearly all before the OCV  
12 415 campaign and over half occurred in the first two weeks of the outbreak. Of note, the outbreak  
13 416 started in February 2018 at about the same time the application for preventive use of OCV was  
14 417 being submitted. The original application proposed a series of preventive campaigns over  
15 418 the next year, and Hoima, as well as neighbouring districts in western Uganda, were targeted  
16 419 for vaccination in the first round of these preventive campaigns. However, when the outbreak  
17 420 was identified, plans were quickly shifted so that an emergency campaign could be  
18 421 implemented to control the outbreak. Even though this emergency response was planned as  
19 422 quickly as possible, in fact, the outbreak was essentially over before the vaccine campaign  
20 423 could start, so it had no impact on the outbreak itself, but likely reduced the risk for future  
21 424 outbreaks.  
22  
23  
24  
25  
26  
27  
28

29 425  
30 426 Though the outbreak started with the influx of the refugees from DRC into Uganda, it quickly  
31 427 spread to the refugee host communities in Hoima. Therefore, to prevent rapid spread,  
32 428 improvement of cholera prevention measures for both the refugees and the host communities is  
33 429 paramount during resettlement.  
34  
35  
36

37 430

## 38 431 **CONCLUSION**

39  
40 432 This study suggests that the OCV campaign in Hoima district to prevent cholera was successful  
41 433 and achieved a high level of coverage in this population that was targeted to be at risk.  
42 434 However, there was need to devote more effort on community sensitisation on the benefits of  
43 435 vaccination, as well as improving some logistic support during the campaign.  
44  
45  
46

47 436  
48 437 While a rapid response to this outbreak was appropriate, in fact, even with a rapidly organized  
49 438 campaign, the outbreak was over before the vaccine could be given; thus, the vaccine had no  
50 439 impact on this outbreak. Nevertheless, this area had already been identified as a hotspot, and it  
51 440 would have been targeted if the planned preventive campaign had proceeded as originally  
52 441 planned. Planners must realize that an area identified as a hotspot might experience an  
53  
54  
55  
56  
57  
58  
59  
60

1  
2  
3 442 outbreak while preparations are underway for a preventive campaign and take this into account  
4  
5 443 when allocating vaccine for preventive vs emergency campaigns. Since these are areas where  
6  
7 444 cholera risk is high, outbreaks are likely to occur in these areas if there are delays in  
8  
9 445 implementing preventive campaigns.  
10  
11  
12  
13  
14  
15  
16  
17  
18  
19  
20  
21  
22  
23  
24  
25  
26  
27  
28  
29  
30  
31  
32  
33  
34  
35  
36  
37  
38  
39  
40  
41  
42  
43  
44  
45  
46  
47  
48  
49  
50  
51  
52  
53  
54  
55  
56  
57  
58  
59  
60

For peer review only

1  
2  
3 447 **FIGURE LEGENDS**

4  
5 448

6 449 **Figure 1. Epicurve of the Hoima Outbreak, 2018 with events identified in response**

7  
8  
9 450 **to the outbreak**

10  
11 451 **Figure 2: Map of Hoima District, showing sub-counties that received OCV and**

12  
13 452 **households where interviews were conducted (red dots)**

14  
15  
16 453

17  
18  
19  
20  
21  
22  
23  
24  
25  
26  
27  
28  
29  
30  
31  
32  
33  
34  
35  
36  
37  
38  
39  
40  
41  
42  
43  
44  
45  
46  
47  
48  
49  
50  
51  
52  
53  
54  
55  
56  
57  
58  
59  
60

For peer review only

454

**Table 1. Age and Sex Breakdown of the Participants in the Cluster Survey**

| Age Group (years) | Male | Female | Total |
|-------------------|------|--------|-------|
| <b>1 to 4</b>     | 98   | 93     | 191   |
| <b>5 to 14</b>    | 236  | 207    | 443   |
| <b>15 to 44</b>   | 210  | 285    | 495   |
| <b>45+</b>        | 80   | 65     | 145   |
| <b>Total</b>      | 625  | 650    | 1274  |

455

456

**Table 2: Vaccination coverage post OCV campaign, Hoima District, Uganda, 2018.**

| Total surveyed = 1274                                        | Round 1      | Round 2      | Received only one dose | Received two doses | Received at least one dose |
|--------------------------------------------------------------|--------------|--------------|------------------------|--------------------|----------------------------|
| <b>Reported number (%)</b>                                   | 1,164 (91.4) | 1,027 (80.6) | 195 (15.3)             | 998 (78.3)         | 1193 (93.6)                |
| <b>(95% CI)</b>                                              | (89.7-92.8)  | (78.3-82.7)  | (13.4-17.4)            | (76.0-80.5)        | (92.2-94.9)                |
| <b>Confirmed by availability of the vaccination card (%)</b> | 1,065 (83.6) | 823 (64.6)   | 142 (11.1)             | 792 (62.2)         | 934 (73.3)                 |
| <b>(95% CI)</b>                                              | (81.5-85.5)  | (61.9-67.2)  | (9.5-13.0)             | (59.5-64.8)        | (70.8-75.7)                |

457

458

**Table 3: Treatment and Resolution of Adverse Events Following Immunization in Hoima District, Uganda, 2018.**

| Symptoms        | Treatment        |             | Status        |             |                               |
|-----------------|------------------|-------------|---------------|-------------|-------------------------------|
|                 | No treatment (%) | Treated (%) | Recovered (%) | Ongoing (%) | Improved, not to baseline (%) |
| <b>Mild</b>     | 24(80.0)         | 6(20.0)     | 29(96.7)      | 1(3.3)      | 0(0.0)                        |
| <b>Moderate</b> | 11(39.3)         | 17(60.7)    | 23(82.1)      | 3(10.7)     | 2(7.1)                        |
| <b>Severe</b>   | 8(61.5)          | 5(38.5)     | 10(76.9)      | 0(0.0)      | 3(23.1)                       |

459

460

461 **Table 4. Onset and frequency of symptoms reported as adverse events**

|     | <6<br>hours | 6-12<br>hours | 12-24<br>hours | 1-7<br>days | 8-14<br>days | Total |
|-----|-------------|---------------|----------------|-------------|--------------|-------|
| 462 |             |               |                |             |              |       |
| 463 | 3           | 2             | 2              | 2           | 0            | 9     |
| 464 | 3           | 0             | 0              | 2           | 0            | 5     |
| 465 | 6           | 0             | 0              | 0           | 0            | 6     |
| 466 | 15*         | 0             | 0              | 0           | 0            | 15    |
| 467 | 0           | 3             | 0              | 1           | 0            | 4     |
| 468 | 0           | 0             | 0              | 0           | 1            | 1     |
| 469 | 1           | 1             | 0              | 3           | 1            | 6     |
| 470 | 1           | 1             | 0              | 6           | 1            | 9     |
| 471 | 1           | 0             | 0              | 0           | 0            | 1     |
| 472 | 0           | 3             | 0              | 0           | 0            | 3     |
| 473 | 0           | 1             | 0              | 0           | 0            | 1     |
| 474 | 0           | 0             | 0              | 0           | 1            | 1     |
| 475 | 0           | 0             | 0              | 1           | 0            | 1     |
| 476 | 3           | 0             | 2              | 1           | 0            | 6     |
| 477 | 1           | 0             | 0              | 2           | 0            | 3     |
| 478 | 34          | 11            | 4              | 18          | 4            | 71    |

- 480 • Three persons reported abdominal pain in one household

## 483 **Acknowledgements**

484 The authors thank the persons and institutions who supported Hoima district OCV monitoring  
485 and evaluation study. Special thanks are extended to the research assistants who dedicated  
486 their time to meticulously collect the data and the persons who collaborated in the preparation of  
487 the different key documents used in this study. We thank the staff, the communities in the study  
488 area and the local leadership of Hoima districts for the cooperation during this study. We are  
489 grateful to Ambrose Buyinza Wabwire for technical support with drawing of the maps.

490  
491 We thank the Ministry of Health leadership for guidance; the Office of the Prime Minister (OPM)  
492 for the permission to access data on the refugee population. We are grateful to the following  
493 institutions and bodies; Ministry of Health, Makerere University School of Public Health, World  
494 Health Organisation, UNICEF and UNHCR for technical guidance.

## 495 **Footnotes**

496 **Contributors:** Conceived and designed the study: GB, MR, WAB, ABS, CGO, DAS.

497 Discussed, critically revised and approved the study protocol: GB, MR, WAB, CGO, DAS.

498 Performed the research: GB, MR, WAB, AO, FR, IA. Analysed the data: GB, MR, WAB, AO,  
499 DAS. Wrote the first draft: GB, MR. Wrote the final DAS. Elaborated, discussed and approved  
500 the final version: GB, MR, AB, ABS, AO, FR, IA, CGO, and DAS.

501  
502 **Funding:** Funding for the study was provided by the Bill and Melinda Gates Foundation  
503 (OPP1148763) which provided financial support through the John Hopkins University, Delivery  
504 of Oral Cholera Vaccine Effectively (DOVE) project. The funding agency had no role in  
505 collecting, analysing or interpreting the results.

## 507 **Declaration of the conflict of interest**

508 The authors have no conflict of interest to declare.

509  
510 **Additional data sharing:** No additional data available.

## 511 REFERENCES

- 512
- 513 1. Clemens JD, Nair GB, Ahmed T, et al. Cholera. *Lancet* 2017 doi: 10.1016/S0140-
- 514 6736(17)30559-7
- 515 2. Cholera vaccines: WHO position paper - August 2017. *Wkly Epidemiol Rec* 2017;92(34):477-
- 516 98.
- 517 3. Kirigia JM, Sambo LG, Yokouide A, et al. Economic burden of cholera in the WHO African
- 518 region. *BMC Int Health Hum Rights* 2009;9:8. doi: 10.1186/1472-698X-9-8
- 519 4. Lessler J, Moore SM, Luquero FJ, et al. Mapping the burden of cholera in sub-Saharan Africa
- 520 and implications for control: an analysis of data across geographical scales. *Lancet*
- 521 2018;391(10133):1908-15. doi: 10.1016/S0140-6736(17)33050-7
- 522 5. Bwire G, Ali M, Sack DA, et al. Identifying cholera "hotspots" in Uganda: An analysis of
- 523 cholera surveillance data from 2011 to 2016. *PLoS Negl Trop Dis* 2017;11(12):e0006118.
- 524 doi: 10.1371/journal.pntd.0006118
- 525 6. Cummings MJ, Wamala JF, Eyura M, et al. A cholera outbreak among semi-nomadic
- 526 pastoralists in northeastern Uganda: epidemiology and interventions. *Epidemiol Infect*
- 527 2012;140(8):1376-85. doi: 10.1017/S0950268811001956 [published Online First:
- 528 2011/09/29]
- 529 7. Bwire G, Mwesawina M, Baluku Y, et al. Cross-Border Cholera Outbreaks in Sub-Saharan
- 530 Africa, the Mystery behind the Silent Illness: What Needs to Be Done? *PLoS One*
- 531 2016;11(6):e0156674. doi: 10.1371/journal.pone.0156674
- 532 8. Bwire G, Malimbo M, Maskery B, et al. The burden of cholera in Uganda. *PLoS Negl Trop Dis*
- 533 2013;7(12):e2545. doi: 10.1371/journal.pntd.0002545
- 534 9. Oguttu DW, Okullo A, Bwire G, et al. Cholera outbreak caused by drinking lake water
- 535 contaminated with human faeces in Kaiso Village, Hoima District, Western Uganda,
- 536 October 2015. *Infect Dis Poverty* 2017;6(1):146. doi: 10.1186/s40249-017-0359-2
- 537 10. Alajo SO, Nakavuma J, Erume J. Cholera in endemic districts in Uganda during El Nino rains:
- 538 2002-2003. *Afr Health Sci* 2006;6(2):93-7. doi: 10.5555/afhs.2006.6.2.93 [published
- 539 Online First: 2006/08/19]
- 540 11. Montgomery M, Jones MW, Kabole I, et al. No end to cholera without basic water,
- 541 sanitation and hygiene. *Bull World Health Organ* 2018;96(6):371-71A. doi:
- 542 10.2471/BLT.18.213678
- 543 12. Legros D, Partners of the Global Task Force on Cholera C. Global Cholera Epidemiology:
- 544 Opportunities to Reduce the Burden of Cholera by 2030. *J Infect Dis* 2018 doi:
- 545 10.1093/infdis/jiy486
- 546 13. Deployments from the oral cholera vaccine stockpile, 2013-2017. *Wkly Epidemiol Rec*
- 547 2017;92(32):437-42.
- 548 14. Odevall L, Hong D, Digilio L, et al. The Euvichol story - Development and licensure of a safe,
- 549 effective and affordable oral cholera vaccine through global public private partnerships.
- 550 *Vaccine* 2018;36(45):6606-14. doi: 10.1016/j.vaccine.2018.09.026
- 551 15. Bwire G, Munier A, Ouedraogo I, et al. Epidemiology of cholera outbreaks and socio-
- 552 economic characteristics of the communities in the fishing villages of Uganda: 2011-
- 553 2015. *PLoS Negl Trop Dis* 2017;11(3):e0005407. doi: 10.1371/journal.pntd.0005407

- 1  
2  
3 554 16. Uganda\_Bureau\_of\_Statistics\_(UBOS). Demographic and Health Survey. 2016 Kampala and  
4 555 Rockville Maryland 2016 [Available from:  
5 556 <https://www.dhsprogram.com/pubs/pdf/FR333/FR333.pdf> accessed Sept 18. 2020  
6 557 2020.
- 7  
8 558 17. Henderson RH, Sundaresan T. Cluster sampling to assess immunization coverage: a review  
9 559 of experience with a simplified sampling method. *Bull World Health Organ*  
10 560 1982;60(2):253-60.
- 11  
12 561 18. Food\_and\_Drug\_Administration. Guidance for Industry. Toxicity Grading Scale for Healthy  
13 562 Adult and Adolescent Volunteers Enrolled in Preventive Vaccine Clinical Trials Rockville,  
14 563 Maryland USA: Food and Drug Administration, Center for Biologics Evaluation and  
15 564 Research 2007 [cited 2020. Available from:  
16 565 <https://www.fda.gov/media/73679/download> accessed September 22 2020.
- 17  
18 566 19. Longini IM, Jr., Nizam A, Ali M, et al. Controlling endemic cholera with oral vaccines. *PLoS*  
19 567 *Med* 2007;4(11):e336. doi: 10.1371/journal.pmed.0040336 [published Online First:  
20 568 2007/11/30]
- 21  
22 569 20. Ali M, Emch M, von Seidlein L, et al. Herd immunity conferred by killed oral cholera vaccines  
23 570 in Bangladesh: a reanalysis. *Lancet* 2005;366(9479):44-9.
- 24 571 21. Sema Baltazar C, Rafael F, Langa JPM, et al. Oral cholera vaccine coverage during a  
25 572 preventive door-to-door mass vaccination campaign in Nampula, Mozambique. *PLoS*  
26 573 *One* 2018;13(10):e0198592. doi: 10.1371/journal.pone.0198592
- 27  
28 574 22. Phares CR, Date K, Travers P, et al. Mass vaccination with a two-dose oral cholera vaccine in  
29 575 a long-standing refugee camp, Thailand. *Vaccine* 2016;34(1):128-33. doi:  
30 576 10.1016/j.vaccine.2015.10.112
- 31  
32 577 23. Khan AI, Khan IA, Siddique SA, et al. Feasibility, coverage and cost of oral cholera  
33 578 vaccination conducted by icddr,b using the existing national immunization service  
34 579 delivery mechanism in rural setting Keraniganj, Bangladesh. *Hum Vaccin Immunother*  
35 580 2019;15(6):1302-09. doi: 10.1080/21645515.2018.1528833
- 36  
37 581 24. Uddin MJ, Wahed T, Saha NC, et al. Coverage and acceptability of cholera vaccine among  
38 582 high-risk population of urban Dhaka, Bangladesh. *Vaccine* 2014;32(43):5690-5. doi:  
39 583 10.1016/j.vaccine.2014.08.021
- 40 584 25. Grandesso F, Rafael F, Chipeta S, et al. Oral cholera vaccination in hard-to-reach  
41 585 communities, Lake Chilwa, Malawi. *Bull World Health Organ* 2018;96(12):817-25. doi:  
42 586 10.2471/BLT.17.206417
- 43  
44 587 26. Sauvageot D, Saussier C, Gobeze A, et al. Oral cholera vaccine coverage in hard-to-reach  
45 588 fishermen communities after two mass Campaigns, Malawi, 2016. *Vaccine*  
46 589 2017;35(38):5194-200. doi: 10.1016/j.vaccine.2017.07.104
- 47  
48 590 27. Massing LA, Aboubakar S, Blake A, et al. Highly targeted cholera vaccination campaigns in  
49 591 urban setting are feasible: The experience in Kalemie, Democratic Republic of Congo.  
50 592 *PLoS Negl Trop Dis* 2018;12(5):e0006369. doi: 10.1371/journal.pntd.0006369
- 51 593 28. Poncin M, Zulu G, Voute C, et al. Implementation research: reactive mass vaccination with  
52 594 single-dose oral cholera vaccine, Zambia. *Bull World Health Organ* 2018;96(2):86-93.  
53 595 doi: 10.2471/BLT.16.189241
- 54  
55  
56  
57  
58  
59



- 1  
2  
3 596 29. Parker LA, Rumunu J, Jamet C, et al. Neighborhood-targeted and case-triggered use of a  
4 597 single dose of oral cholera vaccine in an urban setting: Feasibility and vaccine coverage.  
5 598 *PLoS Negl Trop Dis* 2017;11(6):e0005652. doi: 10.1371/journal.pntd.0005652  
6 599 30. Porta MI, Lenglet A, de Weerd S, et al. Feasibility of a preventive mass vaccination  
7 600 campaign with two doses of oral cholera vaccine during a humanitarian emergency in  
8 601 South Sudan. *Trans R Soc Trop Med Hyg* 2014;108(12):810-5. doi:  
9 602 10.1093/trstmh/tru153  
10 603 31. Lam E, Al-Tamimi W, Russell SP, et al. Oral Cholera Vaccine Coverage during an Outbreak  
11 604 and Humanitarian Crisis, Iraq, 2015. *Emerg Infect Dis* 2017;23(1):38-45. doi:  
12 605 10.3201/eid2301.160881  
13 606 32. Tohme RA, Francois J, Wannemuehler K, et al. Oral Cholera Vaccine Coverage, Barriers to  
14 607 Vaccination, and Adverse Events following Vaccination, Haiti, 2013. *Emerg Infect Dis*  
15 608 2015;21(6):984-91. doi: 10.3201/eid2106.141797  
16 609 33. Luquero FJ, Grout L, Ciglenecki I, et al. First outbreak response using an oral cholera vaccine  
17 610 in Africa: vaccine coverage, acceptability and surveillance of adverse events, Guinea,  
18 611 2012. *PLoS Negl Trop Dis* 2013;7(10):e2465. doi: 10.1371/journal.pntd.0002465

612

1  
2  
3  
4  
5  
6  
7  
8  
9  
10  
11  
12  
13  
14  
15  
16  
17  
18  
19  
20  
21  
22  
23  
24  
25  
26  
27  
28  
29  
30  
31  
32  
33  
34  
35  
36  
37  
38  
39  
40  
41  
42  
43  
44  
45  
46  
47  
48  
49  
50  
51  
52  
53  
54  
55  
56  
57  
58  
59  
60

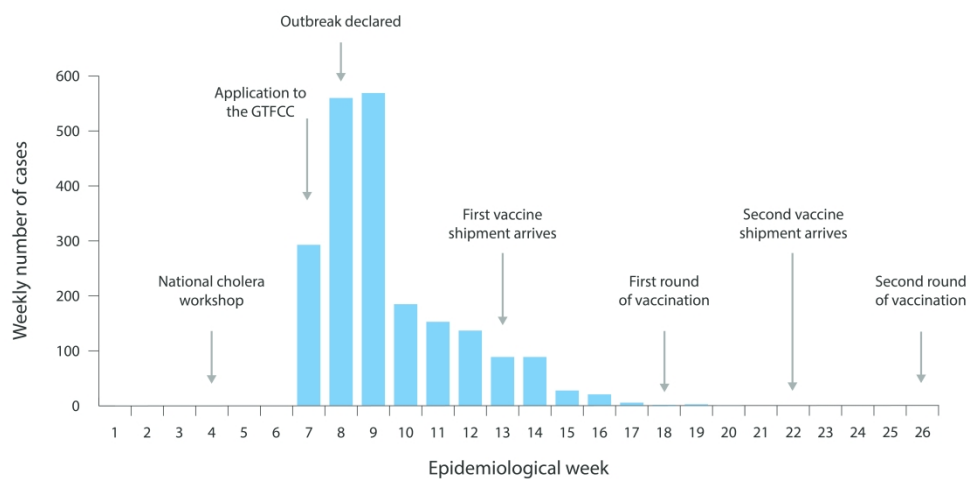

Figure 1. Epicurve of the Hoima Outbreak, 2018 with events identified in response to the outbreak

542x305mm (300 x 300 DPI)

1  
2  
3  
4  
5  
6  
7  
8  
9  
10  
11  
12  
13  
14  
15  
16  
17  
18  
19  
20  
21  
22  
23  
24  
25  
26  
27  
28  
29  
30  
31  
32  
33  
34  
35  
36  
37  
38  
39  
40  
41  
42  
43  
44  
45  
46  
47  
48  
49  
50  
51  
52  
53  
54  
55  
56  
57  
58  
59  
60

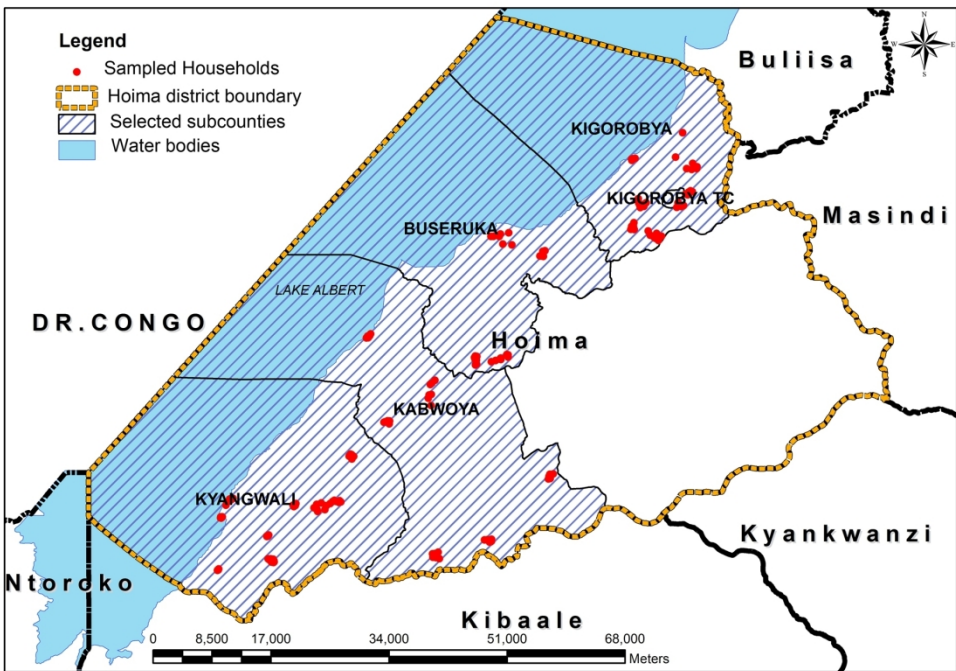

Figure 2: Map of Hoima District, showing sub-counties that received OCV and households where interviews were conducted (red dots)

170x119mm (300 x 300 DPI)

# BMJ Open

## Use of surveys to evaluate an integrated oral cholera vaccine campaign in response to a cholera outbreak in Hoima District, Uganda

|                                 |                                                                                                                                                                                                                                                                                                                                                                                                                                                                                                                                                                                                                                                                                                                                                                                                                          |
|---------------------------------|--------------------------------------------------------------------------------------------------------------------------------------------------------------------------------------------------------------------------------------------------------------------------------------------------------------------------------------------------------------------------------------------------------------------------------------------------------------------------------------------------------------------------------------------------------------------------------------------------------------------------------------------------------------------------------------------------------------------------------------------------------------------------------------------------------------------------|
| Journal:                        | <i>BMJ Open</i>                                                                                                                                                                                                                                                                                                                                                                                                                                                                                                                                                                                                                                                                                                                                                                                                          |
| Manuscript ID                   | bmjopen-2020-038464.R2                                                                                                                                                                                                                                                                                                                                                                                                                                                                                                                                                                                                                                                                                                                                                                                                   |
| Article Type:                   | Original research                                                                                                                                                                                                                                                                                                                                                                                                                                                                                                                                                                                                                                                                                                                                                                                                        |
| Date Submitted by the Author:   | 28-Oct-2020                                                                                                                                                                                                                                                                                                                                                                                                                                                                                                                                                                                                                                                                                                                                                                                                              |
| Complete List of Authors:       | Bwire, Godfrey; Republic of Uganda Ministry of Health, Community Health<br>Roskosky, Mellisa; Johns Hopkins University Bloomberg School of Public Health, International Health<br>Ballard, Anne; Johns Hopkins University Bloomberg School of Public Health, Center for Communications Programs<br>Brooks, W; Johns Hopkins University Bloomberg School of Public Health, International Health<br>Alfred, Okello; Makerere University College of Health Sciences<br>Rafael, Florentina; World Health Organization, Infectious Hazard Management<br>Ampeire, Immaculate; Republic of Uganda Ministry of Health, Expanded Programme on Immunization<br>Orach, Christopher; Makerere University College of Health Sciences<br>Sack, David; Johns Hopkins University Bloomberg School of Public Health, International Health |
| <b>Primary Subject Heading</b>: | Global health                                                                                                                                                                                                                                                                                                                                                                                                                                                                                                                                                                                                                                                                                                                                                                                                            |
| Secondary Subject Heading:      | Epidemiology, Health services research, Infectious diseases, Public health                                                                                                                                                                                                                                                                                                                                                                                                                                                                                                                                                                                                                                                                                                                                               |
| Keywords:                       | Gastrointestinal infections < GASTROENTEROLOGY, International health services < HEALTH SERVICES ADMINISTRATION & MANAGEMENT, Epidemiology < INFECTIOUS DISEASES, Infection control < INFECTIOUS DISEASES, Public health < INFECTIOUS DISEASES, Tropical medicine < INFECTIOUS DISEASES                                                                                                                                                                                                                                                                                                                                                                                                                                                                                                                                   |
|                                 |                                                                                                                                                                                                                                                                                                                                                                                                                                                                                                                                                                                                                                                                                                                                                                                                                          |

SCHOLARONE™  
Manuscripts



I, the Submitting Author has the right to grant and does grant on behalf of all authors of the Work (as defined in the below author licence), an exclusive licence and/or a non-exclusive licence for contributions from authors who are: i) UK Crown employees; ii) where BMJ has agreed a CC-BY licence shall apply, and/or iii) in accordance with the terms applicable for US Federal Government officers or employees acting as part of their official duties; on a worldwide, perpetual, irrevocable, royalty-free basis to BMJ Publishing Group Ltd ("BMJ") its licensees and where the relevant Journal is co-owned by BMJ to the co-owners of the Journal, to publish the Work in this journal and any other BMJ products and to exploit all rights, as set out in our [licence](#).

The Submitting Author accepts and understands that any supply made under these terms is made by BMJ to the Submitting Author unless you are acting as an employee on behalf of your employer or a postgraduate student of an affiliated institution which is paying any applicable article publishing charge ("APC") for Open Access articles. Where the Submitting Author wishes to make the Work available on an Open Access basis (and intends to pay the relevant APC), the terms of reuse of such Open Access shall be governed by a Creative Commons licence – details of these licences and which [Creative Commons](#) licence will apply to this Work are set out in our licence referred to above.

Other than as permitted in any relevant BMJ Author's Self Archiving Policies, I confirm this Work has not been accepted for publication elsewhere, is not being considered for publication elsewhere and does not duplicate material already published. I confirm all authors consent to publication of this Work and authorise the granting of this licence.

1  
2  
3 1 **Use of surveys to evaluate an integrated oral cholera vaccine campaign in response to a**  
4  
5 2 **cholera outbreak in Hoima District, Uganda**

6  
7 3 *Godfrey Bwire*<sup>1</sup>, *Mellisa Roskosky*<sup>2</sup>, *Anne Ballard Sara*<sup>2</sup>, *W. Abdullah Brooks*<sup>2</sup>, *Alfred Okello*<sup>3</sup>,  
8 4 *Florentina Rafael*<sup>4</sup>, *Immaculate Ampeire*<sup>5</sup>, *Christopher Garimoi Orach*<sup>3</sup>, *David A. Sack*<sup>2</sup>.  
9

10  
11  
12 6 **Authors' affiliations:**

- 13 7 1. Ministry of Health, Department of Community Health, Kampala Uganda.  
14 8 2. Johns Hopkins Bloomberg School of Public Health, Department of International Health,  
15 9 Baltimore, Maryland USA.  
16 10 3. Makerere University, College of Health Sciences, Kampala, Uganda.  
17 11 4. World Health Organization, Department of Infectious Hazard Management, Geneva,  
18 12 Switzerland.  
19 13 5. Ministry of Health, Uganda National Expanded Program on Immunization  
20  
21  
22  
23  
24  
25  
26

27 16 \*Corresponding author.

28 17 Professor David A. Sack, M, D.

29 18 Johns Hopkins Bloomberg School of Public Health

30 19 615 North Wolfe Street

31 20 Baltimore, Maryland 21205 USA

32 21 Phone +1 443 287 8795

33 22 Email: [dsack1@jhu.edu](mailto:dsack1@jhu.edu)

34 23 Number of words (Excluding abstract): 4,735

35 24 Number of words in abstract: 264

36 25 Number of tables: 4

37 26 Number of figures: 2

38 27 Number of references: 33

39 28 Number of supplemental materials: 0

40 29  
41 30 Key words: cholera, vaccination, Uganda, monitoring, coverage, outbreak, sub-Saharan Africa,  
42 31 oral cholera vaccine, Vaccine campaign  
43  
44  
45  
46  
47  
48  
49  
50  
51  
52  
53  
54  
55  
56  
57  
58  
59  
60

1  
2  
3 32 **ABSTRACT**

4 33 **Objectives** To evaluate the quality and coverage of the campaign to distribute oral cholera  
5 34 vaccine during a cholera outbreak in Hoima, Uganda to guide future campaigns of cholera  
6 35 vaccine.

7  
8  
9 36 **Design** Survey of communities targeted for vaccination to determine vaccine coverage rates  
10 37 and perceptions of the vaccination campaign, and a separate survey of vaccine staff who  
11 38 carried out the campaign.

12  
13  
14 39 **Setting** Hoima District, Uganda.

15  
16 40 **Participants** Representative clusters of households residing in the communities targeted for  
17 41 vaccination and staff members who conducted the vaccine campaign.

18  
19 42 **Results** Among 209 households (1,274 individuals) included in the coverage survey, 1193  
20 43 (94%; 95% CI: 92-95%) reported receiving at least one OCV dose and 998 (78%; 95% CI: 76-  
21 44 81%) reported receiving two doses. Among vaccinated individuals, minor complaints were  
22 45 reported by 71 persons (5.6%). Individuals with 'some' education (primary school or above)  
23 46 were more knowledgeable regarding the required OCV doses compared to non-educated (p  
24 47 value = 0.03). Factors negatively associated with campaign implementation included community  
25 48 sensitisation time, staff payment, and problems with field transport. Although the campaign was  
26 49 carried out quickly, the outbreak was over before the campaign started. Most staff involved in  
27 50 the campaign (93%) were knowledgeable about cholera control; however, 29% did not clearly  
28 51 understand how to detect and manage adverse events following immunization.

29  
30 52 **Conclusion** The campaign achieved high OCV coverage, but the surveys provided insights for  
31 53 improvement. To achieve high vaccine coverage, more effort is needed for community  
32 54 sensitisation, and additional resources for staff transportation and timely payment for campaign  
33 55 staff is required. Pre and post-test assessment of staff training can identify and address  
34 56 knowledge and skill gaps.

35  
36  
37  
38  
39  
40  
41  
42  
43  
44 58

1  
2  
3 59 **Strengths and limitations of this study**  
4

- 5 60 • The cluster survey of households in communities targeted for vaccination efficiently  
6 61 documented actual vaccine coverage in the target population.  
7  
8 62 • The cluster surveys of households identified mild adverse events not identified during the  
9 63 campaign and identified the emphasize the second dose, especially among less educated  
10 64 groups.  
11  
12 65 • Surveys of the vaccination staff immediately following each round identified certain  
13 66 weaknesses in staff orientation as well as constraints to their job performance in the field.  
14  
15 67 • The household surveys obtained data from a single spokesperson for the household rather  
16 68 than from each individual which might have introduced some uncertainty in the household  
17 69 data.  
18  
19 70 • Evaluation of the vaccination staff was carried through surveys and would have benefited by  
20 71 direct observation of the training and the field performance.  
21  
22  
23  
24  
25  
26  
27  
28  
29  
30  
31  
32  
33  
34  
35  
36  
37  
38  
39  
40  
41  
42  
43  
44  
45  
46  
47  
48  
49  
50  
51  
52  
53  
54  
55  
56  
57  
58  
59  
60



## 73 INTRODUCTION

74 Cholera, a preventable and treatable disease is characterized by profuse watery diarrhoea  
75 caused by infection of the intestine with the bacterium *Vibrio cholerae*.<sup>1</sup> Cholera is a major  
76 cause of morbidity and mortality in several countries in sub-Saharan Africa where cholera  
77 outbreaks also negatively affect development due to associated high economic burden.<sup>2 3</sup>  
78 Between 2010 and 2016 an average 141,918 incident cases annually were reported from sub-  
79 Saharan African countries, including Uganda.<sup>4</sup> In Uganda, cholera outbreaks occurred as both  
80 endemic and epidemic disease. Epidemic disease occurred in northern and eastern Uganda  
81 districts<sup>5</sup> and are thought to be worsened by contamination of water due to poor sanitation.<sup>6</sup>  
82 Cholera outbreaks especially occur in districts along the international borders with the  
83 Democratic Republic of the Congo (DR Congo), South Sudan and Kenya and along the Great  
84 Lakes.<sup>5 7</sup> These districts include Hoima, where cholera is endemic.<sup>5 8-10</sup>

85  
86 There has been debate in the public health community on best practices for endemic and  
87 epidemic cholera disease control, with some preferring to focus on WASH interventions, and  
88 others advocating for OCV for both endemic and epidemic disease control.<sup>11</sup> In part, this has  
89 been facilitated by a relative lack of experience with OCV and concern that excess reliance on  
90 vaccine might negatively affect essential infrastructural development and hygienic practices.  
91 The World Health Organization (WHO) recommends an integrated approach to cholera  
92 prevention where water, sanitation and hygiene (WaSH) interventions are complemented by  
93 vaccine campaigns which provide oral cholera vaccine (OCV) to persons living in areas  
94 considered high risk.<sup>2 12</sup> These vaccine campaigns may be either preventive, in which the  
95 vaccine is targeted to cholera hotspots, or reactive in which the campaign is implemented in  
96 response to an outbreak or a humanitarian emergency.<sup>13</sup>

97  
98 Two WHO-prequalified currently OCVs are available from the global stockpile: Shanchol  
99 (Shantha Biotechnics Limited, India) and Euvichol (Eubiologics Co., Ltd., Korea).<sup>2</sup> The standard  
100 immunization schedule consists of two doses given at an interval of at least two weeks to all  
101 persons in the target area above one year of age. While there is increasing use of OCV to  
102 control outbreaks, preventive use is constrained due to inadequate vaccine supply.<sup>14</sup> Since  
103 creation of a global OCV stockpile in July, 2013, several OCV campaigns had been successfully  
104 implemented<sup>13 14</sup> but it is still important to document national campaign experiences as well as  
105 monitoring and evaluation activities, to continually improve the effectiveness and efficiency of  
106 vaccine campaigns.

1  
2  
3 107 The Ugandan Ministry of Health (MoH) had prepared plans for OCV campaigns in the areas  
4 108 identified as cholera hotspots starting in the western districts of Uganda (including Hoima), near  
5 109 the border with DR Congo and close to, or adjoining Lake Albert. These hotspot districts and  
6 110 their specified sub-counties were confirmed during a national cholera workshop in Kampala on  
7 111 29-31 January 2018. This workshop led to the development of an application for OCV to the  
8 112 Global Taskforce for Cholera Control (GTFCC) which was submitted on 14 February 2018. The  
9 113 application proposed providing OCV in these identified hotspots as a preventive strategy.  
10 114 However, while preparations for these campaigns were underway, an outbreak was declared in  
11 115 Hoima district on 23 February 2018. The earliest cases were identified among DR Congo  
12 116 refugees, but then other cases were seen among the non-refugee Ugandan population. The  
13 117 MoH responded to the outbreak with multisectoral interventions, including proper case  
14 118 management, promotion of access to safe water and improved sanitation (WaSH), enhanced  
15 119 cholera surveillance, as well as infection control and health education. These measures were  
16 120 then supplemented with plans for an emergency OCV campaign. Thus, the original plans for a  
17 121 preventive OCV campaign were shifted to an emergency response to control the outbreak. The  
18 122 first doses of vaccine arrived on 28 March and the first round of vaccinations started on 2 May.  
19 123 The doses for the second round arrived on 29 May and the second round started on 26 June. A  
20 124 door-to-door strategy was used to deliver two doses of vaccine to an estimated 360,000 people,  
21 125 including pregnant women, over the age of one year residing in the four targeted sub-counties.  
22 126 To carry out the campaign, the MoH organized all activities including logistics, community  
23 127 mobilisation and implementation, coordinating ground activities through an assigned point  
24 128 person. Many stakeholders contributed to the campaign including the Hoima district local  
25 129 government, WHO, UNICEF, UNHCR and Médecins sans Frontiers (MSF). Prior to the  
26 130 campaign, the stakeholders met to define and coordinate their complementary tasks.  
27 131 The epidemic curve based on a line list of cases and deaths by date and stated nationality is  
28 132 shown on Figure 1. Over the course of the outbreak, 2,122 cases with 44 deaths (case fatality  
29 133 rate, 2.1%) were reported. Sixty six percent (1,410) of the cases and 64% (28) of the deaths  
30 134 occurred during the first two weeks of the outbreak. Many of the cases and deaths (1276 and  
31 135 32, or 60% and 73%, respectively) occurred among persons who were from DR Congo, and the  
32 136 refugees developed cholera symptoms soon after arrival in Uganda. Among the 44 deaths  
33 137 reported, 25 (57%) occurred in the community, not in the health facility. Nineteen of the fatal  
34 138 cases were treated at the health facility; the case fatality ratio (CFR) for facility-treated patients  
35 139 was 0.9%. Although the emergency vaccination campaign intended to control the outbreak,

1  
2  
3 140 because the outbreak was so sudden and so short-lived, the campaign could only be initiated  
4  
5 141 after the outbreak had already declined.

6 142 *Rationale.* While vaccines are commonly used in Uganda, especially through the longstanding  
7  
8 143 EPI program (Expanded Programme on Immunization), this was the first OCV use in Uganda,  
9  
10 144 and there was no prior experience to guide responders and implementers. Thus, this study was  
11  
12 145 carried out with the aim to document campaign activities and to monitor and evaluate its  
13  
14 146 procedures and outcomes that could guide future OCV campaigns. The issues addressed  
15  
16 147 during this study included the knowledge and practices of the campaign staff, vaccine coverage  
17  
18 148 in the targeted areas, and the knowledge and practices of the community. After this initial  
19  
20 149 campaign, the MoH continued its plans for preventive campaigns in the remaining cholera  
21  
22 150 hotspot districts, informed by the lessons learned from this initial emergency use campaign. In  
23  
24 151 an effort to document the impact of OCV on an outbreak in a setting with endemic disease, we  
25  
26 152 undertook this monitoring and evaluation exercise, as described below.  
27  
28 153

## 25 154 **MATERIALS AND METHODS**

26  
27 155 *Study setting.* Hoima district is located in western Uganda, across Lake Albert from DR Congo.  
28  
29 156 It has a total area of 5735.5 square kilometres and a projected population of 630,000 persons  
30  
31 157 (2018). The district consists of 13 administrative units as follows: 10 sub-counties  
32  
33 158 (Kyabigambire, Buhimba, Kyangwali, Kabwoya, Bugambe, Kiziranfumbi, Kitoba, Kigorobyia,  
34  
35 159 Buseruka and Buhanika), a municipality (Hoima municipality) and two town councils (Kigorobyia  
36  
37 160 and Buhima town councils). The major economic activities of the population in Hoima are  
38  
39 161 subsistence agriculture and fishing. Cholera is endemic in the district but the endemicity is  
40  
41 162 localised in some specific sub-counties particularly those with fishing communities.<sup>15</sup> The sub-  
42  
43 163 counties targeted for OCV included Buseruka, Kabwoya, Kangwali, and Kigorobyia which  
44  
45 164 together constitute the six administrative units of Kyangwali, Kigorobyia, Kabwoya Buseruka,  
46  
47 165 Kigorobyia town council and Kyangwali refugee settlement (Old and New) as shown in Figure 2.  
48  
49 166

46 167 *Population and design for the Monitoring and Evaluation of the OCV Campaign.* Two sub-  
47  
48 168 studies were conducted to assess different aspects of the campaign. In sub-study one, a  
49  
50 169 representative sample of the population that was targeted for vaccination was questioned to  
51  
52 170 determine vaccine coverage rates, detect adverse events following immunization (AEFI) and  
53  
54 171 collect additional information from the communities about the vaccine campaign. Sub-study two  
55  
56 172 consisted of a survey among the campaign staff who participated in the OCV campaign after  
57  
58 173 each round to assess their knowledge and practices.

1  
2  
3 174 *Sub-study 1, community assessment.* Sub-study one was a two-stage, cluster survey  
4  
5 175 conducted in the vaccine target area, consisting of 31 clusters, each cluster consisting of 4 to 7  
6  
7 176 households per cluster. The study population included each person > one year of age who was  
8  
9 177 living in the OCV targeted area at the time of the vaccination campaign. We assumed a  
10  
11 178 household size of five persons based on estimates from a Demographic Health Survey  
12  
13 179 conducted in 2016.<sup>16</sup> The sample was increased in order to raise the analytical power and  
14  
15 180 precision of the surveys and to allow for separate analysis by gender. The formula used for  
16  
17 181 determining sample size was,  $n = (z^2pq)/d^2$ ,<sup>17</sup> where 'n' is the number of people desired for the  
18  
19 182 survey, 'd' is the precision of the result, 'z' is the confidence limit, and 'p' and 'q' correspond to  
20  
21 183 the proportion of persons in the population who are immunised and not immunised, respectively.  
22  
23 184 We chose to use a low coverage of 50%.

24  
25 185  
26  
27 186 To identify the clusters, a list of villages was obtained from each of the four sub-counties  
28  
29 187 targeted for vaccination. From these lists, the Excel random number generator  
30  
31 188 (=RANDBETWEENBOTTOM, TOP) was used to select the 31 villages from which households  
32  
33 189 were selected. The number of villages per sub-county was proportionate to the population of  
34  
35 190 the sub-county. The sub-county populations were obtained from the district planning unit.  
36  
37 191 From each selected village a list of households was obtained from the village administrative  
38  
39 192 leader (Local Council (LC) – 1. This is the smallest recognised administrative unit in Uganda. It  
40  
41 193 is headed an elected leader called LC-1) who provided a list of households from which we  
42  
43 194 randomly selected households to interview.

44  
45 195  
46  
47 196 For the household interviews, data were collected through standardized questionnaires during  
48  
49 197 face-to-face interviews conducted by trained research assistants using the local language.  
50  
51 198 Within a selected household the questionnaires were administered to the key respondents  
52  
53 199 (head of the HHs), who represented the entire household and provided information about each  
54  
55 200 member of the household. If a suitable key respondent was absent, additional visits were  
56  
57 201 scheduled. In two households, a person could not be located, and the household was dropped.  
58  
59 202 For each vaccinated person, the research assistants assessed cholera immunization status.  
60  
61 203 Vaccination status was ascertained in two ways: either the informant verbally indicated  
62  
63 204 that the individual had received the dose of vaccine or the vaccination was recorded on  
64  
65 205 the vaccine card. If the informant did not have a vaccine card, the reliability of the  
66  
67 206 vaccination information was validated by asking about the details of the procedures of

1  
2  
3 207 the vaccination (e.g. being given recently by mouth to all persons > 1 year of age). None  
4  
5 208 of the residents who were approached refused to answer the survey. The age and sex of the  
6  
7 209 participants in the survey is shown in Table 1.

8  
9 210  
10 211 *Adverse Events Following Immunization (AEFI)*. The occurrence of AEFIs were assessed by  
11 212 asking for symptoms among the vaccine recipients following vaccination. As part of the  
12 213 campaign itself, a routine system for AEFI detection was established in which the vaccine team  
13 214 members advised vaccinees to report to a health worker or to seek care at a health facility if  
14 215 they experienced symptoms following immunization. By contrast, the AEFI surveillance in this  
15 216 sub-study asked the participants who participated in the cluster survey about symptoms they  
16 217 may have experienced. This AEFI sub-study was thus, designed to enhance our understanding  
17 218 of potential AEFIs which may not have been reported through the routine AEFI surveillance.

18 219  
19 220 AEFIs were categorised for each individual member of the household who received a dose of  
20 221 OCV as follows. They were considered mild if the symptoms did not interfere with normal  
21 222 activities; moderate if they interfered somewhat; and severe if the symptoms prevented the  
22 223 individual from continuing normal activities.<sup>18</sup> Persons who reported to be having ongoing  
23 224 symptoms > 72 hours were advised to visit the nearest health facility for more care. Among  
24 225 those reporting symptoms, information was recorded as to whether the person took any  
25 226 medicine or received any treatment to lessen the symptoms.

26 227  
27 228 *Data collection and analysis*. Data from the community surveys were collected by tablet  
28 229 computers using *Kobo Collect* (<https://www.kobotoolbox.org/>) installed to record the responses  
29 230 in the field. Data were cleaned, coded, and stored in Stata Version 14. Data were analysed to  
30 231 generate frequencies, percentages or proportions and means. Comparisons between groups  
31 232 was done via logistic regression for the calculation of odds ratios and 95% confidence intervals.  
32 233 The results of analysis were presented in the form of graphs, tables, charts, and means and  
33 234 were included in interim and end of campaign reports.

34 235  
35 236 *Quality Assurance*. Research assistants were trained on data collection methods and were able  
36 237 to consult field supervisors and the principal investigator on any issue that was not clear to  
37 238 them. For quality assurance, the survey supervisors revisited about 10% of the households, not  
38 239 to collect the data again, but to ensure that they were not skipped by the interviewers for eligible

1  
2  
3 240 respondents. The surveys were conducted about two weeks after completion of the second  
4 241 round of the vaccination campaign to minimize recall bias.

5 242  
6  
7  
8 243 *Sub-study 2, staff assessment.* Staff were assessed on their level of knowledge on the cause of  
9 244 cholera, the importance of safe water in cholera prevention, the target age group for cholera  
10 245 vaccination, and knowledge about AEFI and the procedures for care should subjects experience  
11 246 an AEFI. Staff were surveyed twice with each survey taking place within two weeks after  
12 247 administration of the first and second OCV rounds, respectively. All staff who participated  
13 248 directly by administering the vaccines or indirectly through supervisory roles and who were  
14 249 present at the workstation during the study period were enrolled in the survey. For the staff  
15 250 survey, structured questions were administered on paper questionnaires that allowed for adding  
16 251 text to explain the answers (open-ended questions). Most of the vaccine staff had taken part in  
17 252 other public health campaigns, but none had participated earlier with a campaign to distribute  
18 253 OCV.

19 254 *Ethical Considerations.* This study was conducted as part of the routine MoH operational  
20 255 research for improvement of health services; however, ethical issues were considered and  
21 256 addressed. The proposal was approved by the Makerere University School of Public Health  
22 257 Institutional Review Board (MaKSPH IRB) (no 610 in 2018) and Uganda National Council of  
23 258 Science and Technology. Written informed consent was obtained from all participants in both  
24 259 sub-studies. Participation in the study was voluntary and respondents were free to opt out at  
25 260 any stage of the interviews.

26 261 Confidentiality was observed at all stages of the study. No names or personal identifiers were  
27 262 included on the questionnaires. The research assistants underwent training on interview  
28 263 techniques, neutrality, and research ethics. The benefits of the study to the staff included the  
29 264 ability to express themselves, provide feedback and observations that in turn might lead to  
30 265 improvements in supportive services for their training and work.

31 266  
32 267 *Patient and Public Involvement.* This research was done without research subject  
33 268 involvement. The time was inadequate to involve the subjects prior to the vaccine campaign.  
34 269 They were also not invited to contribute to the writing or editing of this document for readability  
35 270 or accuracy. However, the findings of the study were disseminated to the Hoima district  
36 271 administration, MoH and other policymakers to use them to strengthen health service  
37 272 interventions and future OCV campaigns.

273

**274 RESULTS**

275 *Sub-study One, community survey results.* The community surveys were carried out in the four  
276 sub-counties in Hoima districts of Buseruka, Kabwoya, Kyangwali and Kigoroby as shown in  
277 Figure 2 and Table 1. [Insert Figure 2 and Table 1] A total of 209 households, including 1,274  
278 individuals, were surveyed. Most (96%) of the respondents were household heads or their  
279 spouses. All respondents confirmed that they were living in the targeted OCV area at the time of  
280 the campaign. Fifty-one (51%) of the respondents had primary education, 17% had secondary  
281 education, 1% had tertiary education, and the remaining 31% had no education. The  
282 respondents were aged 18 – 89 years with a mean age of 40 years. Both sexes were present,  
283 with no statistically significant difference.

284 By verbal reports, 94% (95% CI: 92-95%) of the residents received at least one dose and 78%  
285 (95% CI: 76-81%) received two doses of OCV. From verbal reporting, 91% (95% CI: 90-93%) of  
286 residents received vaccine during the first round and 81% (95% CI: 78-83%) received vaccine  
287 during the second round. For many of the households, a vaccine card was available, and the  
288 vaccination card was used to confirm vaccination status. Using information from the card only,  
289 coverage was 84% (95% CI: 82-86%) and 65% (95% CI: 62-67%) for round one and round two  
290 respectively and the two-dose coverage was 62% (95% CI: 60-65%). Coverage rates are  
291 shown on Table 2. [Insert Table 2]

292  
293 Among those who did not receive a dose of vaccine, over half of these missed doses (254 of the  
294 357 missed doses during the two rounds) were because the person was not at home at the time  
295 of vaccination or was out of town. In a few cases, the vaccine team missed the household,  
296 accounting for 53 missed doses. Refusing to take vaccine was not reported.

297  
298 *Reported AEFIs.* Overall, 71 individuals of 1,274 respondents (5.6%) reported an AEFI (Table  
299 3). Determining a causal relation between the vaccination and the reported symptoms was not  
300 attempted. [Insert Table 3]

301  
302 Most AEFIs were considered mild or moderate, but 8 (0.6%) persons reported an AEFI as  
303 severe. Most (60%) of the persons reporting an AEFI did not seek treatment including 60% of  
304 those reporting a severe AEFI. 29.6% of the reported adverse events occurred in the first round,  
305 40.9% in the second round and 29.6% in both rounds. The most common symptoms were  
306 abdominal pain (15), diarrhoea, (9), fever, nausea, and headache (each 6) reports. Table 4

1  
2  
3 307 provides additional information on the AEFIs. The reported AEFIs were infrequent relative to the  
4 308 number of doses distributed and there were no serious adverse events reported. [Insert Table4]

5  
6 309

7  
8 310 ***Community knowledge of oral cholera vaccines.***

9 311 A majority (77%) of the respondents understood that vaccine was one of the ways to prevent  
10 312 cholera. There was a statistically significant association between education level and knowledge  
11 313 about OCV with those having at least a primary school education being almost twice as likely to  
12 314 know the number of required doses as compared to those with no education (OR 1.90, 95% CI  
13 315 1.06, 3.44 (P = 0.03).

14 316 *Sub-study Two, staff survey.* A total of 242 and 125 staff responded to the first and second  
15 317 knowledge and practice (KP) surveys (KP1 and KP2). Most respondents were vaccination team  
16 318 members (89% and 87% in vaccine rounds 1 and 2, respectively). Almost all the respondents  
17 319 were knowledgeable about the cause of cholera, the importance of safe water in cholera  
18 320 prevention and the vaccine target group, but were less knowledgeable regarding potential  
19 321 adverse events following administration (AEFI) or how to advise vaccinees, with 29% and 16%  
20 322 being less informed about AEFI during the first and second surveys.

21 323 When staff were asked to suggest areas that needed improvement in future OCV campaigns,  
22 324 more than 10% suggested more timely payment of allowances, more time to sensitize and  
23 325 inform the communities on the benefits of the vaccine, and better transportation and facilitation  
24 326 allowances (payments to health workers to cover the cost they incurred when administering the  
25 327 vaccines or conducting activities related to the OCV campaign). Other suggestions included  
26 328 use of both static and mobile vaccination points, provision of gumboots, umbrellas, and more  
27 329 areas for vaccine storage in sub-counties where vaccine would be more accessible, more  
28 330 workers for hard to reach areas, and an increase in the number of vaccine days to complete the  
29 331 vaccinations and increase coverage.

30 332

31 333 **DISCUSSION**

32 334 The results of this monitoring and evaluation exercise documented important findings on the  
33 335 OCV campaign, the knowledge and practices of both the community and the health staff  
34 336 involved in the campaign and implications for the conduct of future OCV campaigns as part of  
35 337 an integrated cholera control strategy. These findings suggest that the OCV campaign in Hoima  
36 338 successfully provided the vaccine to a very large proportion of the target population in Hoima  
37 339 district, western Uganda. Approximately 93.6% of respondents reported receiving at least one



1  
2  
3 340 dose and 78.3% reported receiving two doses among residents. Given the mobile and transient  
4 341 nature of this population, this was noteworthy, and suggests that even better coverage may be  
5 342 possible for more settled populations in Uganda.  
6  
7

8 343  
9 344 Since this was the first such campaign with OCV, there was concern that the population might  
10 345 be reluctant to accept it. This is a vaccine with which they were not familiar, it was given orally  
11 346 to all ages rather by injection to children, and two doses were required. Despite these potential  
12 347 constraints, we found that most people accepted taking the vaccine readily; however, some  
13 348 were not at home resulting in missed vaccinations.  
14  
15  
16  
17

18 349  
19 350 High vaccination coverage is especially important when one is attempting to achieve herd  
20 351 protection. Since it is estimated that herd protection can be achieved with a coverage even  
21 352 lower than 90%;<sup>19</sup> the high coverage achieved in this campaign would be expected to induce  
22 353 significant indirect protection even among those who did not receive vaccine.<sup>19 20</sup>  
23  
24  
25

26 354  
27 355 It was noted in the administrative report from the MoH and during a stakeholder's meeting that  
28 356 one of the reasons for the reduction in the coverage during the second OCV dose was the  
29 357 unpredictable campaign dates for the second round. The vaccine for the second round had to  
30 358 be shipped and cleared through customs, and the timing for this was not certain. To avoid this  
31 359 problem in the future, a mechanism needs to be established to provide a better timeline for  
32 360 receipt of the vaccine shipments.  
33  
34  
35

36 361  
37  
38 362 *Community Reception to OCV.* As with previous OCV campaigns outside Uganda, very few  
39 363 AEFI were reported.<sup>21 22</sup> Most of adverse events were considered mild or moderate and were  
40 364 self-limited. Despite the low prevalence of AEFI, the survey exposed the need to better inform  
41 365 the community about seeking treatment for more severe adverse events or for those that do not  
42 366 quickly resolve. This was especially true for families with little education who were less likely to  
43 367 seek medical attention for severe AEFI (data not shown). Notably, members in the community  
44 368 demonstrated good understanding of the rationale for the vaccine; however, a key takeaway  
45 369 from the survey was a need to better communicate the number of required doses, given that  
46 370 those with more education were twice as likely than those with no education to know the  
47 371 number of doses needed.  
48  
49  
50  
51  
52  
53

54 372  
55  
56  
57  
58  
59  
60

1  
2  
3 373 *Staff Reception to OCV.* Inclusion of staff KP survey contributed to the success of the project  
4 374 by identifying gaps among the staff knowledge and performance. Questioning the vaccine staff  
5 375 about their training and their experience in the field is not a common activity when conducting  
6 376 monitoring and evaluation activities during OCV campaigns. Many people had to be mobilized  
7 377 quickly and these were the key people who interacted with the communities. It was important  
8 378 that the staff accurately represent the campaign as an integrated cholera prevention program,  
9 379 but this was the first time these people carried out this role. The MoH felt it important to monitor  
10 380 their knowledge and behaviors as well as any constraints they felt in carrying out their functions.  
11 381 While they were generally knowledgeable about the disease and about the vaccine, these staff  
12 382 needed additional training regarding recognizing and managing AEFIs. They also faced  
13 383 challenges regarding logistical support. After the first staff KP survey, these gaps were  
14 384 communicated to the MoH so that appropriate actions could be taken to ensure that these gaps  
15 385 were addressed prior to the second round.  
16 386

17 387 Most other OCV campaigns have also reported high coverage rates. These have included  
18 388 reports from Bangladesh<sup>23 24</sup>, Malawi<sup>25 26</sup>, Mozambique<sup>21</sup>, Democratic Republic of Congo <sup>27</sup>,  
19 389 Zambia <sup>28</sup>, South Sudan <sup>29 30</sup>, Iraq<sup>31</sup>, Haiti<sup>32</sup>, and Guinea <sup>33</sup>. Clearly, OCV is well accepted  
20 390 among these very diverse population groups where the vaccine campaigns have been carried  
21 391 out.  
22 392

23 393 Important limitations of this study need to be mentioned. Ideally, one would prefer to conduct  
24 394 community studies prior to a campaign to understand knowledge and attitudes about cholera to  
25 395 improve communications regarding the upcoming campaign as part of an integrated strategy to  
26 396 control cholera. However, since the campaign was carried out on an emergency basis during an  
27 397 outbreak, a study prior to the campaign was not possible. Secondly, a community survey  
28 398 immediately after the first round might have provided feedback to the teams that would have  
29 399 improved the coverage for the second round. It should also be noted that a single informant  
30 400 provided information about receipt of the vaccine for all members of the household, so this  
31 401 informant might have incorrect information concerning one or more members of the household;  
32 402 however, since the vaccine was directly given to the household members together, it seems that  
33 403 inaccuracies would be minimal. The community KP survey did not include questions on attitudes  
34 404 regarding cholera. Since the survey had to be carried out very quickly following the campaign,  
35 405 and since the survey was targeted to identify issues that would be immediately relevant to  
36 406 campaign performance, it was felt that understanding attitudes regarding cholera, even though

1  
2  
3 407 important, would have required other qualitative methods requiring more time than was  
4 408 available. Similarly, direct observation of the training and coordination meetings would have  
5 409 been useful to independently assess the efficiency and effectiveness of these training and  
6 410 coordination meetings. Furthermore, there was no list of all workers in the campaign and many  
7 411 of the workers who participated in the second round had left prior to administering the  
8 412 questionnaire; thus, there were fewer respondents in the second round and the proportion of all  
9 413 workers who participated could not be determined precisely. Finally, it was not possible, given  
10 414 the time constraints, to fully integrate WASH interventions together with the OCV campaign, or  
11 415 to monitor and evaluate community and staff responsiveness to such integration.  
12  
13  
14  
15  
16  
17  
18

19 417 In this outbreak 2,122 cholera cases and 44 deaths were reported, nearly all before the OCV  
20 418 campaign and over half occurred in the first two weeks of the outbreak. Of note, the outbreak  
21 419 started in February 2018 at about the same time the application for preventive use of OCV was  
22 420 being submitted. The original application proposed a series of preventive campaigns over  
23 421 the next year, and Hoima, as well as neighbouring districts in western Uganda, were targeted  
24 422 for vaccination in the first round of these preventive campaigns. However, when the outbreak  
25 423 was identified, plans were quickly shifted so that an emergency campaign could be  
26 424 implemented to control the outbreak. Even though this emergency response was planned as  
27 425 quickly as possible, in fact, the outbreak was essentially over before the vaccine campaign  
28 426 could start, so it had no impact on the outbreak itself, but likely reduced the risk for future  
29 427 outbreaks.  
30  
31  
32  
33  
34  
35  
36  
37

38 429 Though the outbreak started with the influx of the refugees from DRC into Uganda, it quickly  
39 430 spread to the refugee host communities in Hoima. Therefore, to prevent rapid spread,  
40 431 improvement of cholera prevention measures for both the refugees and the host communities is  
41 432 paramount during resettlement.  
42  
43  
44  
45

## 46 434 **CONCLUSION**

47  
48 435 This study suggests that the OCV campaign in Hoima district to prevent cholera was successful  
49 436 and achieved a high level of coverage in this population at high risk. However, there was need  
50 437 to devote more effort on community sensitisation on the benefits of vaccination, as well as  
51 438 improving some logistic support during the campaign.  
52  
53  
54  
55  
56  
57  
58  
59  
60

1  
2  
3 440 While a rapid response to this outbreak was appropriate, in fact, even with a rapidly organized  
4 441 campaign, the outbreak was over before the vaccine could be given; thus, the vaccine had no  
5 442 impact on this outbreak. Nevertheless, this area had already been identified as a hotspot, and it  
6 443 would have been targeted if the planned preventive campaign had proceeded as originally  
7 444 planned. Planners must realize that an area identified as a hotspot might experience an  
8 445 outbreak while preparations are underway for a preventive campaign and take this into account  
9 446 when allocating vaccine for preventive vs emergency campaigns. Since these are areas where  
10 447 cholera risk is high, outbreaks are likely to occur in these areas if there are delays in  
11 448 implementing preventive campaigns.  
12  
13  
14  
15  
16  
17  
18  
19  
20  
21  
22  
23  
24  
25  
26  
27  
28  
29  
30  
31  
32  
33  
34  
35  
36  
37  
38  
39  
40  
41  
42  
43  
44  
45  
46  
47  
48  
49  
50  
51  
52  
53  
54  
55  
56  
57  
58  
59  
60

1  
2  
3  
4  
5  
6  
7  
8  
9  
10  
11  
12  
13  
14  
15  
16  
17  
18  
19  
20  
21  
22  
23  
24  
25  
26  
27  
28  
29  
30  
31  
32  
33  
34  
35  
36  
37  
38  
39  
40  
41  
42  
43  
44  
45  
46  
47  
48  
49  
50  
51  
52  
53  
54  
55  
56  
57  
58  
59  
60

450 **FIGURE LEGENDS**

451

452 **Figure 1. Epicurve of the Hoima Outbreak, 2018 with events identified in response to the**  
453 **outbreak**

454 **Figure 2: Map of Hoima District, showing sub-counties that received OCV and**  
455 **households where interviews were conducted (red dots)**

456

For peer review only

457

**Table 1. Age and Sex Breakdown of the Participants in the Cluster Survey**

| Age Group (years) | Male       | Female     | Total       |
|-------------------|------------|------------|-------------|
| 1 to 4            | 98         | 93         | 191         |
| 5 to 14           | 236        | 207        | 443         |
| 15 to 44          | 210        | 285        | 495         |
| 45+               | 80         | 65         | 145         |
| <b>Total</b>      | <b>625</b> | <b>650</b> | <b>1274</b> |

458

459

**Table 2: Vaccination coverage post OCV campaign, Hoima District, Uganda, 2018.**

| Total surveyed =<br>1274                                              | Round 1                  | Round 2                  | Received only one dose | Received two doses     | Received at least one dose |
|-----------------------------------------------------------------------|--------------------------|--------------------------|------------------------|------------------------|----------------------------|
| <b>Reported number (%) (95% CI)</b>                                   | 1,164 (91.4) (89.7-92.8) | 1,027 (80.6) (78.3-82.7) | 195 (15.3) (13.4-17.4) | 998 (78.3) (76.0-80.5) | 1193 (93.6) (92.2-94.9)    |
| <b>Confirmed by availability of the vaccination card (%) (95% CI)</b> | 1,065 (83.6) (81.5-85.5) | 823 (64.6) (61.9-67.2)   | 142 (11.1) (9.5-13.0)  | 792 (62.2) (59.5-64.8) | 934 (73.3) (70.8-75.7)     |

460

461

**Table 3: Treatment and Resolution of Adverse Events Following Immunization in Hoima District, Uganda, 2018.**

| Symptoms        | Treatment        |             | Status        |             |                               |
|-----------------|------------------|-------------|---------------|-------------|-------------------------------|
|                 | No treatment (%) | Treated (%) | Recovered (%) | Ongoing (%) | Improved, not to baseline (%) |
| <b>Mild</b>     | 24(80.0)         | 6(20.0)     | 29(96.7)      | 1(3.3)      | 0(0.0)                        |
| <b>Moderate</b> | 11(39.3)         | 17(60.7)    | 23(82.1)      | 3(10.7)     | 2(7.1)                        |
| <b>Severe</b>   | 8(61.5)          | 5(38.5)     | 10(76.9)      | 0(0.0)      | 3(23.1)                       |

462

463

464 **Table 4. Onset and frequency of symptoms reported as**  
465 **adverse events**

|                             | <6<br>hours | 6-12<br>hours | 12-24<br>hours | 1-7<br>days | 8-14<br>days | Total |
|-----------------------------|-------------|---------------|----------------|-------------|--------------|-------|
| <b>Diarrhoea</b>            | 3           | 2             | 2              | 2           | 0            | 9     |
| <b>Vomiting</b>             | 3           | 0             | 0              | 2           | 0            | 5     |
| <b>Nausea</b>               | 6           | 0             | 0              | 0           | 0            | 6     |
| <b>Abdominal<br/>pain</b>   | 15*         | 0             | 0              | 0           | 0            | 15    |
| <b>Stomach<br/>gurgling</b> | 0           | 3             | 0              | 1           | 0            | 4     |
| <b>Mouth<br/>ulcers</b>     | 0           | 0             | 0              | 0           | 1            | 1     |
| <b>Cough</b>                | 1           | 1             | 0              | 3           | 1            | 6     |
| <b>Felt<br/>feverish</b>    | 1           | 1             | 0              | 6           | 1            | 9     |
| <b>Poor<br/>appetite</b>    | 1           | 0             | 0              | 0           | 0            | 1     |
| <b>Dizziness</b>            | 0           | 3             | 0              | 0           | 0            | 3     |
| <b>Fainted</b>              | 0           | 1             | 0              | 0           | 0            | 1     |
| <b>Itching</b>              | 0           | 0             | 0              | 0           | 1            | 1     |
| <b>Weakness</b>             | 0           | 0             | 0              | 1           | 0            | 1     |
| <b>Headache</b>             | 3           | 0             | 2              | 1           | 0            | 6     |
| <b>Other</b>                | 1           | 0             | 0              | 2           | 0            | 3     |
| <b>Total</b>                | 34          | 11            | 4              | 18          | 4            | 71    |

484 • Three persons reported abdominal pain in one household

485

## 486 **Acknowledgements**

487 The authors thank the persons and institutions who supported Hoima district OCV monitoring  
488 and evaluation study. Special thanks are extended to the research assistants who dedicated  
489 their time to meticulously collect the data and the persons who collaborated in the preparation of  
490 the different key documents used in this study. We thank the staff, the communities in the study  
491 area and the local leadership of Hoima districts for the cooperation during this study. We are  
492 grateful to Ambrose Buyinza Wabwire for technical support with drawing of the maps.

493  
494 We thank the Ministry of Health leadership for guidance; the Office of the Prime Minister (OPM)  
495 for the permission to access data on the refugee population. We are grateful to the following  
496 institutions and bodies; Ministry of Health, Makerere University School of Public Health, World  
497 Health Organisation, UNICEF and UNHCR for technical guidance.

## 498 **Footnotes**

499 **Contributors:** Conceived and designed the study: GB, MR, WAB, ABS, CGO, DAS.  
500 Discussed, critically revised and approved the study protocol: GB, MR, WAB, CGO, DAS.  
501 Performed the research: GB, MR, WAB, AO, FR, IA. Analysed the data: GB, MR, WAB, AO,  
502 DAS. Wrote the first draft: GB, MR. Wrote the final DAS. Elaborated, discussed and approved  
503 the final version: GB, MR, AB, ABS, AO, FR, IA, CGO, and DAS.

504  
505 **Funding:** Funding for the study was provided by the Bill and Melinda Gates Foundation  
506 (OPP1148763) which provided financial support through the John Hopkins University, Delivery  
507 of Oral Cholera Vaccine Effectively (DOVE) project. The funding agency had no role in  
508 collecting, analysing or interpreting the results.

## 510 **Declaration of the conflict of interest**

511 The authors have no conflict of interest to declare.

512

513 **Additional data sharing:** Data are available upon reasonable request



## REFERENCES

1. Clemens JD, Nair GB, Ahmed T, et al. Cholera. *Lancet* 2017 doi: 10.1016/S0140-6736(17)30559-7
2. Cholera vaccines: WHO position paper - August 2017. *Wkly Epidemiol Rec* 2017;92(34):477-98.
3. Kirigia JM, Sambo LG, Yokouide A, et al. Economic burden of cholera in the WHO African region. *BMC Int Health Hum Rights* 2009;9:8. doi: 10.1186/1472-698X-9-8
4. Lessler J, Moore SM, Luquero FJ, et al. Mapping the burden of cholera in sub-Saharan Africa and implications for control: an analysis of data across geographical scales. *Lancet* 2018;391(10133):1908-15. doi: 10.1016/S0140-6736(17)33050-7
5. Bwire G, Ali M, Sack DA, et al. Identifying cholera "hotspots" in Uganda: An analysis of cholera surveillance data from 2011 to 2016. *PLoS Negl Trop Dis* 2017;11(12):e0006118. doi: 10.1371/journal.pntd.0006118
6. Cummings MJ, Wamala JF, Eyura M, et al. A cholera outbreak among semi-nomadic pastoralists in northeastern Uganda: epidemiology and interventions. *Epidemiol Infect* 2012;140(8):1376-85. doi: 10.1017/S0950268811001956 [published Online First: 2011/09/29]
7. Bwire G, Mwesawina M, Baluku Y, et al. Cross-Border Cholera Outbreaks in Sub-Saharan Africa, the Mystery behind the Silent Illness: What Needs to Be Done? *PLoS One* 2016;11(6):e0156674. doi: 10.1371/journal.pone.0156674
8. Bwire G, Malimbo M, Maskery B, et al. The burden of cholera in Uganda. *PLoS Negl Trop Dis* 2013;7(12):e2545. doi: 10.1371/journal.pntd.0002545
9. Oguttu DW, Okullo A, Bwire G, et al. Cholera outbreak caused by drinking lake water contaminated with human faeces in Kaiso Village, Hoima District, Western Uganda, October 2015. *Infect Dis Poverty* 2017;6(1):146. doi: 10.1186/s40249-017-0359-2
10. Alajo SO, Nakavuma J, Erume J. Cholera in endemic districts in Uganda during El Nino rains: 2002-2003. *Afr Health Sci* 2006;6(2):93-7. doi: 10.5555/afhs.2006.6.2.93 [published Online First: 2006/08/19]
11. Montgomery M, Jones MW, Kabole I, et al. No end to cholera without basic water, sanitation and hygiene. *Bull World Health Organ* 2018;96(6):371-71A. doi: 10.2471/BLT.18.213678
12. Legros D, Partners of the Global Task Force on Cholera C. Global Cholera Epidemiology: Opportunities to Reduce the Burden of Cholera by 2030. *J Infect Dis* 2018 doi: 10.1093/infdis/jiy486
13. Deployments from the oral cholera vaccine stockpile, 2013-2017. *Wkly Epidemiol Rec* 2017;92(32):437-42.
14. Odevall L, Hong D, Digilio L, et al. The Euvichol story - Development and licensure of a safe, effective and affordable oral cholera vaccine through global public private partnerships. *Vaccine* 2018;36(45):6606-14. doi: 10.1016/j.vaccine.2018.09.026
15. Bwire G, Munier A, Ouedraogo I, et al. Epidemiology of cholera outbreaks and socio-economic characteristics of the communities in the fishing villages of Uganda: 2011-2015. *PLoS Negl Trop Dis* 2017;11(3):e0005407. doi: 10.1371/journal.pntd.0005407

- 1  
2  
3 557 16. Uganda\_Bureau\_of\_Statistics\_(UBOS). Demographic and Health Survey. 2016 Kampala and  
4 558 Rockville Maryland2016 [Available from:  
5 559 <https://www.dhsprogram.com/pubs/pdf/FR333/FR333.pdf> accessed Sept 18. 2020  
6 560 2020.
- 7  
8 561 17. Henderson RH, Sundaresan T. Cluster sampling to assess immunization coverage: a review  
9 562 of experience with a simplified sampling method. *Bull World Health Organ*  
10 563 1982;60(2):253-60.
- 11  
12 564 18. Food\_and\_Drug\_Administration. Guidance for Industry. Toxicity Grading Scale for Healthy  
13 565 Adult and Adolescent Volunteers Enrolled in Preventive Vaccine Clinical Trials Rockville,  
14 566 Maryland USA: Food and Drug Administration, Center for Biologics Evaluation and  
15 567 Research 2007 [cited 2020. Available from:  
16 568 <https://www.fda.gov/media/73679/download> accessed September 22 2020.
- 17  
18 569 19. Longini IM, Jr., Nizam A, Ali M, et al. Controlling endemic cholera with oral vaccines. *PLoS*  
19 570 *Med* 2007;4(11):e336. doi: 10.1371/journal.pmed.0040336 [published Online First:  
20 571 2007/11/30]
- 21  
22 572 20. Ali M, Emch M, von Seidlein L, et al. Herd immunity conferred by killed oral cholera vaccines  
23 573 in Bangladesh: a reanalysis. *Lancet* 2005;366(9479):44-9.
- 24 574 21. Sema Baltazar C, Rafael F, Langa JPM, et al. Oral cholera vaccine coverage during a  
25 575 preventive door-to-door mass vaccination campaign in Nampula, Mozambique. *PLoS*  
26 576 *One* 2018;13(10):e0198592. doi: 10.1371/journal.pone.0198592
- 27  
28 577 22. Phares CR, Date K, Travers P, et al. Mass vaccination with a two-dose oral cholera vaccine in  
29 578 a long-standing refugee camp, Thailand. *Vaccine* 2016;34(1):128-33. doi:  
30 579 10.1016/j.vaccine.2015.10.112
- 31  
32 580 23. Khan AI, Khan IA, Siddique SA, et al. Feasibility, coverage and cost of oral cholera  
33 581 vaccination conducted by icddr,b using the existing national immunization service  
34 582 delivery mechanism in rural setting Keraniganj, Bangladesh. *Hum Vaccin Immunother*  
35 583 2019;15(6):1302-09. doi: 10.1080/21645515.2018.1528833
- 36 584 24. Uddin MJ, Wahed T, Saha NC, et al. Coverage and acceptability of cholera vaccine among  
37 585 high-risk population of urban Dhaka, Bangladesh. *Vaccine* 2014;32(43):5690-5. doi:  
38 586 10.1016/j.vaccine.2014.08.021
- 39  
40 587 25. Grandesso F, Rafael F, Chipeta S, et al. Oral cholera vaccination in hard-to-reach  
41 588 communities, Lake Chilwa, Malawi. *Bull World Health Organ* 2018;96(12):817-25. doi:  
42 589 10.2471/BLT.17.206417
- 43  
44 590 26. Sauvageot D, Saussier C, Gobeze A, et al. Oral cholera vaccine coverage in hard-to-reach  
45 591 fishermen communities after two mass Campaigns, Malawi, 2016. *Vaccine*  
46 592 2017;35(38):5194-200. doi: 10.1016/j.vaccine.2017.07.104
- 47 593 27. Massing LA, Aboubakar S, Blake A, et al. Highly targeted cholera vaccination campaigns in  
48 594 urban setting are feasible: The experience in Kalemie, Democratic Republic of Congo.  
49 595 *PLoS Negl Trop Dis* 2018;12(5):e0006369. doi: 10.1371/journal.pntd.0006369
- 50  
51 596 28. Poncin M, Zulu G, Voute C, et al. Implementation research: reactive mass vaccination with  
52 597 single-dose oral cholera vaccine, Zambia. *Bull World Health Organ* 2018;96(2):86-93.  
53 598 doi: 10.2471/BLT.16.189241  
54  
55  
56  
57  
58  
59  
60

- 1  
2  
3 599 29. Parker LA, Rumunu J, Jamet C, et al. Neighborhood-targeted and case-triggered use of a  
4 600 single dose of oral cholera vaccine in an urban setting: Feasibility and vaccine coverage.  
5 601 *PLoS Negl Trop Dis* 2017;11(6):e0005652. doi: 10.1371/journal.pntd.0005652  
6 602 30. Porta MI, Lenglet A, de Weerd S, et al. Feasibility of a preventive mass vaccination  
7 603 campaign with two doses of oral cholera vaccine during a humanitarian emergency in  
8 604 South Sudan. *Trans R Soc Trop Med Hyg* 2014;108(12):810-5. doi:  
9 605 10.1093/trstmh/tru153  
10 606 31. Lam E, Al-Tamimi W, Russell SP, et al. Oral Cholera Vaccine Coverage during an Outbreak  
11 607 and Humanitarian Crisis, Iraq, 2015. *Emerg Infect Dis* 2017;23(1):38-45. doi:  
12 608 10.3201/eid2301.160881  
13 609 32. Tohme RA, Francois J, Wannemuehler K, et al. Oral Cholera Vaccine Coverage, Barriers to  
14 610 Vaccination, and Adverse Events following Vaccination, Haiti, 2013. *Emerg Infect Dis*  
15 611 2015;21(6):984-91. doi: 10.3201/eid2106.141797  
16 612 33. Luquero FJ, Grout L, Ciglenecki I, et al. First outbreak response using an oral cholera vaccine  
17 613 in Africa: vaccine coverage, acceptability and surveillance of adverse events, Guinea,  
18 614 2012. *PLoS Negl Trop Dis* 2013;7(10):e2465. doi: 10.1371/journal.pntd.0002465

615

1  
2  
3  
4  
5  
6  
7  
8  
9  
10  
11  
12  
13  
14  
15  
16  
17  
18  
19  
20  
21  
22  
23  
24  
25  
26  
27  
28  
29  
30  
31  
32  
33  
34  
35  
36  
37  
38  
39  
40  
41  
42  
43  
44  
45  
46  
47  
48  
49  
50  
51  
52  
53  
54  
55  
56  
57  
58  
59  
60



Figure 1. Epicurve of the Hoima Outbreak, 2018 with events identified in response to the outbreak

542x305mm (300 x 300 DPI)

1  
2  
3  
4  
5  
6  
7  
8  
9  
10  
11  
12  
13  
14  
15  
16  
17  
18  
19  
20  
21  
22  
23  
24  
25  
26  
27  
28  
29  
30  
31  
32  
33  
34  
35  
36  
37  
38  
39  
40  
41  
42  
43  
44  
45  
46  
47  
48  
49  
50  
51  
52  
53  
54  
55  
56  
57  
58  
59  
60



Figure 2: Map of Hoima District, showing sub-counties that received OCV and households where interviews were conducted (red dots)

170x119mm (300 x 300 DPI)

# BMJ Open

## Use of surveys to evaluate an integrated oral cholera vaccine campaign in response to a cholera outbreak in Hoima District, Uganda

|                                 |                                                                                                                                                                                                                                                                                                                                                                                                                                                                                                                                                                                                                                                                                                                                                                                                                          |
|---------------------------------|--------------------------------------------------------------------------------------------------------------------------------------------------------------------------------------------------------------------------------------------------------------------------------------------------------------------------------------------------------------------------------------------------------------------------------------------------------------------------------------------------------------------------------------------------------------------------------------------------------------------------------------------------------------------------------------------------------------------------------------------------------------------------------------------------------------------------|
| Journal:                        | <i>BMJ Open</i>                                                                                                                                                                                                                                                                                                                                                                                                                                                                                                                                                                                                                                                                                                                                                                                                          |
| Manuscript ID                   | bmjopen-2020-038464.R3                                                                                                                                                                                                                                                                                                                                                                                                                                                                                                                                                                                                                                                                                                                                                                                                   |
| Article Type:                   | Original research                                                                                                                                                                                                                                                                                                                                                                                                                                                                                                                                                                                                                                                                                                                                                                                                        |
| Date Submitted by the Author:   | 17-Nov-2020                                                                                                                                                                                                                                                                                                                                                                                                                                                                                                                                                                                                                                                                                                                                                                                                              |
| Complete List of Authors:       | Bwire, Godfrey; Republic of Uganda Ministry of Health, Community Health<br>Roskosky, Mellisa; Johns Hopkins University Bloomberg School of Public Health, International Health<br>Ballard, Anne; Johns Hopkins University Bloomberg School of Public Health, Center for Communications Programs<br>Brooks, W; Johns Hopkins University Bloomberg School of Public Health, International Health<br>Alfred, Okello; Makerere University College of Health Sciences<br>Rafael, Florentina; World Health Organization, Infectious Hazard Management<br>Ampeire, Immaculate; Republic of Uganda Ministry of Health, Expanded Programme on Immunization<br>Orach, Christopher; Makerere University College of Health Sciences<br>Sack, David; Johns Hopkins University Bloomberg School of Public Health, International Health |
| <b>Primary Subject Heading</b>: | Global health                                                                                                                                                                                                                                                                                                                                                                                                                                                                                                                                                                                                                                                                                                                                                                                                            |
| Secondary Subject Heading:      | Epidemiology, Health services research, Infectious diseases, Public health                                                                                                                                                                                                                                                                                                                                                                                                                                                                                                                                                                                                                                                                                                                                               |
| Keywords:                       | Gastrointestinal infections < GASTROENTEROLOGY, International health services < HEALTH SERVICES ADMINISTRATION & MANAGEMENT, Epidemiology < INFECTIOUS DISEASES, Infection control < INFECTIOUS DISEASES, Public health < INFECTIOUS DISEASES, Tropical medicine < INFECTIOUS DISEASES                                                                                                                                                                                                                                                                                                                                                                                                                                                                                                                                   |
|                                 |                                                                                                                                                                                                                                                                                                                                                                                                                                                                                                                                                                                                                                                                                                                                                                                                                          |

SCHOLARONE™  
Manuscripts



I, the Submitting Author has the right to grant and does grant on behalf of all authors of the Work (as defined in the below author licence), an exclusive licence and/or a non-exclusive licence for contributions from authors who are: i) UK Crown employees; ii) where BMJ has agreed a CC-BY licence shall apply, and/or iii) in accordance with the terms applicable for US Federal Government officers or employees acting as part of their official duties; on a worldwide, perpetual, irrevocable, royalty-free basis to BMJ Publishing Group Ltd ("BMJ") its licensees and where the relevant Journal is co-owned by BMJ to the co-owners of the Journal, to publish the Work in this journal and any other BMJ products and to exploit all rights, as set out in our [licence](#).

The Submitting Author accepts and understands that any supply made under these terms is made by BMJ to the Submitting Author unless you are acting as an employee on behalf of your employer or a postgraduate student of an affiliated institution which is paying any applicable article publishing charge ("APC") for Open Access articles. Where the Submitting Author wishes to make the Work available on an Open Access basis (and intends to pay the relevant APC), the terms of reuse of such Open Access shall be governed by a Creative Commons licence – details of these licences and which [Creative Commons](#) licence will apply to this Work are set out in our licence referred to above.

Other than as permitted in any relevant BMJ Author's Self Archiving Policies, I confirm this Work has not been accepted for publication elsewhere, is not being considered for publication elsewhere and does not duplicate material already published. I confirm all authors consent to publication of this Work and authorise the granting of this licence.

1  
2  
3 1 **Use of surveys to evaluate an integrated oral cholera vaccine campaign in response to a**  
4  
5 2 **cholera outbreak in Hoima District, Uganda**

6  
7 3 *Godfrey Bwire*<sup>1</sup>, *Mellisa Roskosky*<sup>2</sup>, *Anne Ballard Sara*<sup>2</sup>, *W. Abdullah Brooks*<sup>2</sup>, *Alfred Okello*<sup>3</sup>,  
8 4 *Florentina Rafael*<sup>4</sup>, *Immaculate Ampeire*<sup>5</sup>, *Christopher Garimoi Orach*<sup>3</sup>, *David A. Sack*<sup>2</sup>.  
9

10  
11  
12 6 **Authors' affiliations:**

- 13 7 1. Ministry of Health, Department of Community Health, Kampala Uganda.  
14 8 2. Johns Hopkins Bloomberg School of Public Health, Department of International Health,  
15 9 Baltimore, Maryland USA.  
16 10 3. Makerere University, College of Health Sciences, Kampala, Uganda.  
17 11 4. World Health Organization, Department of Infectious Hazard Management, Geneva,  
18 12 Switzerland.  
19 13 5. Ministry of Health, Uganda National Expanded Program on Immunization  
20  
21  
22  
23  
24  
25  
26

27 16 \*Corresponding author.

28 17 Professor David A. Sack, M, D.

29 18 Johns Hopkins Bloomberg School of Public Health

30 19 615 North Wolfe Street

31 20 Baltimore, Maryland 21205 USA

32 21 Phone +1 443 287 8795

33 22 Email: [dsack1@jhu.edu](mailto:dsack1@jhu.edu)

34 23 Number of words (Excluding abstract): 4,735

35 24 Number of words in abstract: 264

36 25 Number of tables: 4

37 26 Number of figures: 2

38 27 Number of references: 33

39 28 Number of supplemental materials: 0

40 29

41 30 Key words: cholera, vaccination, Uganda, monitoring, coverage, outbreak, sub-Saharan Africa,  
42 31 oral cholera vaccine, Vaccine campaign  
43  
44  
45  
46  
47  
48  
49  
50  
51  
52  
53  
54  
55  
56  
57  
58  
59  
60



1  
2  
3 32 **ABSTRACT**

4 33 **Objectives** To evaluate the quality and coverage of the campaign to distribute oral cholera  
5 34 vaccine during a cholera outbreak in Hoima, Uganda to guide future campaigns of cholera  
6 35 vaccine.

7  
8  
9 36 **Design** Survey of communities targeted for vaccination to determine vaccine coverage rates  
10 37 and perceptions of the vaccination campaign, and a separate survey of vaccine staff who  
11 38 carried out the campaign.

12  
13  
14 39 **Setting** Hoima District, Uganda.

15  
16 40 **Participants** Representative clusters of households residing in the communities targeted for  
17 41 vaccination and staff members who conducted the vaccine campaign.

18  
19 42 **Results** Among 209 households (1,274 individuals) included in the coverage survey, 1193  
20 43 (94%; 95% CI: 92-95%) reported receiving at least one OCV dose and 998 (78%; 95% CI: 76-  
21 44 81%) reported receiving two doses. Among vaccinated individuals, minor complaints were  
22 45 reported by 71 persons (5.6%). Individuals with 'some' education (primary school or above)  
23 46 were more knowledgeable regarding the required OCV doses compared to non-educated (p  
24 47 value = 0.03). Factors negatively associated with campaign implementation included community  
25 48 sensitisation time, staff payment, and problems with field transport. Although the campaign was  
26 49 carried out quickly, the outbreak was over before the campaign started. Most staff involved in  
27 50 the campaign (93%) were knowledgeable about cholera control; however, 29% did not clearly  
28 51 understand how to detect and manage adverse events following immunization.

29  
30 52 **Conclusion** The campaign achieved high OCV coverage, but the surveys provided insights for  
31 53 improvement. To achieve high vaccine coverage, more effort is needed for community  
32 54 sensitisation, and additional resources for staff transportation and timely payment for campaign  
33 55 staff is required. Pre and post-test assessment of staff training can identify and address  
34 56 knowledge and skill gaps.

35  
36  
37  
38  
39  
40  
41  
42  
43  
44 58

1  
2  
3 59 **Strengths and limitations of this study**  
4

- 5 60 • The cluster survey of households in communities targeted for vaccination efficiently  
6 61 documented actual vaccine coverage in the target population.  
7  
8 62 • The cluster surveys of households identified mild adverse events not identified during the  
9 63 campaign and identified the emphasize the second dose, especially among less educated  
10 64 groups.  
11  
12 65 • Surveys of the vaccination staff immediately following each round identified certain  
13 66 weaknesses in staff orientation as well as constraints to their job performance in the field.  
14  
15 67 • The household surveys obtained data from a single spokesperson for the household rather  
16 68 than from each individual which might have introduced some uncertainty in the household  
17 69 data.  
18  
19 70 • Evaluation of the vaccination staff was carried through surveys and would have benefited by  
20 71 direct observation of the training and the field performance.  
21  
22  
23  
24  
25  
26  
27  
28  
29  
30  
31  
32  
33  
34  
35  
36  
37  
38  
39  
40  
41  
42  
43  
44  
45  
46  
47  
48  
49  
50  
51  
52  
53  
54  
55  
56  
57  
58  
59  
60

## 73 INTRODUCTION

74 Cholera, a preventable and treatable disease is characterized by profuse watery diarrhoea  
75 caused by infection of the intestine with the bacterium *Vibrio cholerae*.<sup>1</sup> Cholera is a major  
76 cause of morbidity and mortality in several countries in sub-Saharan Africa where cholera  
77 outbreaks also negatively affect development due to associated high economic burden.<sup>2 3</sup>  
78 Between 2010 and 2016 an average 141,918 incident cases annually were reported from sub-  
79 Saharan African countries, including Uganda.<sup>4</sup> In Uganda, cholera outbreaks occurred as both  
80 endemic and epidemic disease. Epidemic disease occurred in northern and eastern Uganda  
81 districts<sup>5</sup> and are thought to be worsened by contamination of water due to poor sanitation.<sup>6</sup>  
82 Cholera outbreaks especially occur in districts along the international borders with the  
83 Democratic Republic of the Congo (DR Congo), South Sudan and Kenya and along the Great  
84 Lakes.<sup>5 7</sup> These districts include Hoima, where cholera is endemic.<sup>5 8-10</sup>

85  
86 There has been debate in the public health community on best practices for endemic and  
87 epidemic cholera disease control, with some preferring to focus on WASH interventions, and  
88 others advocating for OCV for both endemic and epidemic disease control.<sup>11</sup> In part, this has  
89 been facilitated by a relative lack of experience with OCV and concern that excess reliance on  
90 vaccine might negatively affect essential infrastructural development and hygienic practices.  
91 The World Health Organization (WHO) recommends an integrated approach to cholera  
92 prevention where water, sanitation and hygiene (WaSH) interventions are complemented by  
93 vaccine campaigns which provide oral cholera vaccine (OCV) to persons living in areas  
94 considered high risk.<sup>2 12</sup> These vaccine campaigns may be either preventive, in which the  
95 vaccine is targeted to cholera hotspots, or reactive in which the campaign is implemented in  
96 response to an outbreak or a humanitarian emergency.<sup>13</sup>

97  
98 Two WHO-prequalified currently OCVs are available from the global stockpile: Shanchol  
99 (Shantha Biotechnics Limited, India) and Euvichol (Eubiologics Co., Ltd., Korea).<sup>2</sup> The standard  
100 immunization schedule consists of two doses given at an interval of at least two weeks to all  
101 persons in the target area above one year of age. While there is increasing use of OCV to  
102 control outbreaks, preventive use is constrained due to inadequate vaccine supply.<sup>14</sup> Since  
103 creation of a global OCV stockpile in July, 2013, several OCV campaigns had been successfully  
104 implemented<sup>13 14</sup> but it is still important to document national campaign experiences as well as  
105 monitoring and evaluation activities, to continually improve the effectiveness and efficiency of  
106 vaccine campaigns.

1  
2  
3 107 The Ugandan Ministry of Health (MoH) had prepared plans for OCV campaigns in the areas  
4 108 identified as cholera hotspots starting in the western districts of Uganda (including Hoima), near  
5 109 the border with DR Congo and close to, or adjoining Lake Albert. These hotspot districts and  
6 110 their specified sub-counties were confirmed during a national cholera workshop in Kampala on  
7 111 29-31 January 2018. This workshop led to the development of an application for OCV to the  
8 112 Global Taskforce for Cholera Control (GTFCC) which was submitted on 14 February 2018. The  
9 113 application proposed providing OCV in these identified hotspots as a preventive strategy.  
10 114 However, while preparations for these campaigns were underway, an outbreak was declared in  
11 115 Hoima district on 23 February 2018. The earliest cases were identified among DR Congo  
12 116 refugees, but then other cases were seen among the non-refugee Ugandan population. The  
13 117 MoH responded to the outbreak with multisectoral interventions, including proper case  
14 118 management, promotion of access to safe water and improved sanitation (WaSH), enhanced  
15 119 cholera surveillance, as well as infection control and health education. These measures were  
16 120 then supplemented with plans for an emergency OCV campaign. Thus, the original plans for a  
17 121 preventive OCV campaign were shifted to an emergency response to control the outbreak. The  
18 122 first doses of vaccine arrived on 28 March and the first round of vaccinations started on 2 May.  
19 123 The doses for the second round arrived on 29 May and the second round started on 26 June. A  
20 124 door-to-door strategy was used to deliver two doses of vaccine to an estimated 360,000 people,  
21 125 including pregnant women, over the age of one year residing in the four targeted sub-counties.  
22 126 To carry out the campaign, the MoH organized all activities including logistics, community  
23 127 mobilisation and implementation, coordinating ground activities through an assigned point  
24 128 person. Many stakeholders contributed to the campaign including the Hoima district local  
25 129 government, WHO, UNICEF, UNHCR and Médecins sans Frontiers (MSF). Prior to the  
26 130 campaign, the stakeholders met to define and coordinate their complementary tasks.  
27 131 The epidemic curve based on a line list of cases and deaths by date and stated nationality is  
28 132 shown on Figure 1. Over the course of the outbreak, 2,122 cases with 44 deaths (case fatality  
29 133 rate, 2.1%) were reported. Sixty six percent (1,410) of the cases and 64% (28) of the deaths  
30 134 occurred during the first two weeks of the outbreak. Many of the cases and deaths (1276 and  
31 135 32, or 60% and 73%, respectively) occurred among persons who were from DR Congo, and the  
32 136 refugees developed cholera symptoms soon after arrival in Uganda. Among the 44 deaths  
33 137 reported, 25 (57%) occurred in the community, not in the health facility. Nineteen of the fatal  
34 138 cases were treated at the health facility; the case fatality ratio (CFR) for facility-treated patients  
35 139 was 0.9%. Although the emergency vaccination campaign intended to control the outbreak,

1  
2  
3 140 because the outbreak was so sudden and so short-lived, the campaign could only be initiated  
4 141 after the outbreak had already declined.  
5  
6 142 *Rationale.* While vaccines are commonly used in Uganda, especially through the longstanding  
7  
8 143 EPI program (Expanded Programme on Immunization), this was the first OCV use in Uganda,  
9  
10 144 and there was no prior experience to guide responders and implementers. Thus, this study was  
11  
12 145 carried out with the aim to document campaign activities and to monitor and evaluate its  
13  
14 146 procedures and outcomes that could guide future OCV campaigns. The issues addressed  
15  
16 147 during this study included the knowledge and practices of the campaign staff, vaccine coverage  
17  
18 148 in the targeted areas, and the knowledge and practices of the community. After this initial  
19  
20 149 campaign, the MoH continued its plans for preventive campaigns in the remaining cholera  
21  
22 150 hotspot districts, informed by the lessons learned from this initial emergency use campaign. In  
23  
24 151 an effort to document the impact of OCV on an outbreak in a setting with endemic disease, we  
25  
26 152 undertook this monitoring and evaluation exercise, as described below.  
27  
28 153

## 25 154 **MATERIALS AND METHODS**

26  
27 155 *Study setting.* Hoima district is located in western Uganda, across Lake Albert from DR Congo.  
28  
29 156 It has a total area of 5735.5 square kilometres and a projected population of 630,000 persons  
30  
31 157 (2018). The district consists of 13 administrative units as follows: 10 sub-counties  
32  
33 158 (Kyabigambire, Buhimba, Kyangwali, Kabwoya, Bugambe, Kiziranfumbi, Kitoba, Kigorobyia,  
34  
35 159 Buseruka and Buhanika), a municipality (Hoima municipality) and two town councils (Kigorobyia  
36  
37 160 and Buhima town councils). The major economic activities of the population in Hoima are  
38  
39 161 subsistence agriculture and fishing. Cholera is endemic in the district but the endemicity is  
40  
41 162 localised in some specific sub-counties particularly those with fishing communities.<sup>15</sup> The sub-  
42  
43 163 counties targeted for OCV included Buseruka, Kabwoya, Kangwali, and Kigorobyia which  
44  
45 164 together constitute the six administrative units of Kyangwali, Kigorobyia, Kabwoya Buseruka,  
46  
47 165 Kigorobyia town council and Kyangwali refugee settlement (Old and New) as shown in Figure 2.  
48  
49 166

46 167 *Population and design for the Monitoring and Evaluation of the OCV Campaign.* Two sub-  
47  
48 168 studies were conducted to assess different aspects of the campaign. In sub-study one, a  
49  
50 169 representative sample of the population that was targeted for vaccination was questioned to  
51  
52 170 determine vaccine coverage rates, detect adverse events following immunization (AEFI) and  
53  
54 171 collect additional information from the communities about the vaccine campaign. Sub-study two  
55  
56 172 consisted of a survey among the campaign staff who participated in the OCV campaign after  
57  
58 173 each round to assess their knowledge and practices.

1  
2  
3 174 *Sub-study 1, community assessment.* Sub-study one was a two-stage, cluster survey  
4  
5 175 conducted in the vaccine target area, consisting of 31 clusters, each cluster consisting of 4 to 7  
6  
7 176 households per cluster. The study population included each person > one year of age who was  
8  
9 177 living in the OCV targeted area at the time of the vaccination campaign. We assumed a  
10  
11 178 household size of five persons based on estimates from a Demographic Health Survey  
12  
13 179 conducted in 2016.<sup>16</sup> The sample was increased in order to raise the analytical power and  
14  
15 180 precision of the surveys and to allow for separate analysis by gender. The formula used for  
16  
17 181 determining sample size was,  $n = (z^2pq)/d^2$ ,<sup>17</sup> where 'n' is the number of people desired for the  
18  
19 182 survey, 'd' is the precision of the result, 'z' is the confidence limit, and 'p' and 'q' correspond to  
20  
21 183 the proportion of persons in the population who are immunised and not immunised, respectively.  
22  
23 184 We chose to use a low coverage of 50%.

24  
25 185  
26  
27 186 To identify the clusters, a list of villages was obtained from each of the four sub-counties  
28  
29 187 targeted for vaccination. From these lists, the Excel random number generator  
30  
31 188 (=RANDBETWEENBOTTOM, TOP) was used to select the 31 villages from which households  
32  
33 189 were selected. The number of villages per sub-county was proportionate to the population of  
34  
35 190 the sub-county. The sub-county populations were obtained from the district planning unit.  
36  
37 191 From each selected village a list of households was obtained from the village administrative  
38  
39 192 leader (Local Council (LC) – 1. This is the smallest recognised administrative unit in Uganda. It  
40  
41 193 is headed an elected leader called LC-1) who provided a list of households from which we  
42  
43 194 randomly selected households to interview.

44  
45 195  
46  
47 196 For the household interviews, data were collected through standardized questionnaires during  
48  
49 197 face-to-face interviews conducted by trained research assistants using the local language.  
50  
51 198 Within a selected household the questionnaires were administered to the key respondents  
52  
53 199 (head of the HHs), who represented the entire household and provided information about each  
54  
55 200 member of the household. If a suitable key respondent was absent, additional visits were  
56  
57 201 scheduled. In two households, a person could not be located, and the household was dropped.  
58  
59 202 For each vaccinated person, the research assistants assessed cholera immunization status.  
60  
61 203 Vaccination status was ascertained in two ways: either the informant verbally indicated  
62  
63 204 that the individual had received the dose of vaccine or the vaccination was recorded on  
64  
65 205 the vaccine card. If the informant did not have a vaccine card, the reliability of the  
66  
67 206 vaccination information was validated by asking about the details of the procedures of

1  
2  
3 207 the vaccination (e.g. being given recently by mouth to all persons > 1 year of age). None  
4  
5 208 of the residents who were approached refused to answer the survey. The age and sex of the  
6  
7 209 participants in the survey is shown in Table 1.

8  
9 210  
10 211 *Adverse Events Following Immunization (AEFI)*. The occurrence of AEFIs were assessed by  
11 212 asking for symptoms among the vaccine recipients following vaccination. As part of the  
12 213 campaign itself, a routine system for AEFI detection was established in which the vaccine team  
13 214 members advised vaccinees to report to a health worker or to seek care at a health facility if  
14 215 they experienced symptoms following immunization. By contrast, the AEFI surveillance in this  
15 216 sub-study asked the participants who participated in the cluster survey about symptoms they  
16 217 may have experienced. This AEFI sub-study was thus, designed to enhance our understanding  
17 218 of potential AEFIs which may not have been reported through the routine AEFI surveillance.

18 219  
19 220 AEFIs were categorised for each individual member of the household who received a dose of  
20 221 OCV as follows. They were considered mild if the symptoms did not interfere with normal  
21 222 activities; moderate if they interfered somewhat; and severe if the symptoms prevented the  
22 223 individual from continuing normal activities.<sup>18</sup> Persons who reported to be having ongoing  
23 224 symptoms > 72 hours were advised to visit the nearest health facility for more care. Among  
24 225 those reporting symptoms, information was recorded as to whether the person took any  
25 226 medicine or received any treatment to lessen the symptoms.

26 227  
27 228 *Data collection and analysis*. Data from the community surveys were collected by tablet  
28 229 computers using *Kobo Collect* (<https://www.kobotoolbox.org/>) installed to record the responses  
29 230 in the field. Data were cleaned, coded, and stored in Stata Version 14. Data were analysed to  
30 231 generate frequencies, percentages or proportions and means. Comparisons between groups  
31 232 was done via logistic regression for the calculation of odds ratios and 95% confidence intervals.  
32 233 The results of analysis were presented in the form of graphs, tables, charts, and means and  
33 234 were included in interim and end of campaign reports.

34 235  
35 236 *Quality Assurance*. Research assistants were trained on data collection methods and were able  
36 237 to consult field supervisors and the principal investigator on any issue that was not clear to  
37 238 them. For quality assurance, the survey supervisors revisited about 10% of the households, not  
38 239 to collect the data again, but to ensure that they were not skipped by the interviewers for eligible

1  
2  
3 240 respondents. The surveys were conducted about two weeks after completion of the second  
4 241 round of the vaccination campaign to minimize recall bias.

5 242  
6  
7  
8 243 *Sub-study 2, staff assessment.* Staff were assessed on their level of knowledge on the cause of  
9 244 cholera, the importance of safe water in cholera prevention, the target age group for cholera  
10 245 vaccination, and knowledge about AEFI and the procedures for care should subjects experience  
11 246 an AEFI. Staff were surveyed twice with each survey taking place within two weeks after  
12 247 administration of the first and second OCV rounds, respectively. All staff who participated  
13 248 directly by administering the vaccines or indirectly through supervisory roles and who were  
14 249 present at the workstation during the study period were enrolled in the survey. For the staff  
15 250 survey, structured questions were administered on paper questionnaires that allowed for adding  
16 251 text to explain the answers (open-ended questions). Most of the vaccine staff had taken part in  
17 252 other public health campaigns, but none had participated earlier with a campaign to distribute  
18 253 OCV.

19 254 *Ethical Considerations.* This study was conducted as part of the routine MoH operational  
20 255 research for improvement of health services; however, ethical issues were considered and  
21 256 addressed. The proposal was approved by the Makerere University School of Public Health  
22 257 Institutional Review Board (MaKSPH IRB) (no 610 in 2018) and Uganda National Council of  
23 258 Science and Technology. Written informed consent was obtained from all participants in both  
24 259 sub-studies. Participation in the study was voluntary and respondents were free to opt out at  
25 260 any stage of the interviews.

26 261 Confidentiality was observed at all stages of the study. No names or personal identifiers were  
27 262 included on the questionnaires. The research assistants underwent training on interview  
28 263 techniques, neutrality, and research ethics. The benefits of the study to the staff included the  
29 264 ability to express themselves, provide feedback and observations that in turn might lead to  
30 265 improvements in supportive services for their training and work.

31 266  
32  
33  
34 267 *Patient and Public Involvement.* This research was done without research subject  
35 268 involvement. The time was inadequate to involve the subjects prior to the vaccine campaign.  
36 269 They were also not invited to contribute to the writing or editing of this document for readability  
37 270 or accuracy. However, the findings of the study were disseminated to the Hoima district  
38 271 administration, MoH and other policymakers to use them to strengthen health service  
39 272 interventions and future OCV campaigns.



273

274 **RESULTS**

275 *Sub-study One, community survey results.* The community surveys were carried out in the four  
276 sub-counties in Hoima districts of Buseruka, Kabwoya, Kyangwali and Kigoroby as shown in  
277 Figure 2 and Table 1. [Insert Figure 2 and Table 1] A total of 209 households, including 1,274  
278 individuals, were surveyed. Most (96%) of the respondents were household heads or their  
279 spouses. All respondents confirmed that they were living in the targeted OCV area at the time of  
280 the campaign. Fifty-one (51%) of the respondents had primary education, 17% had secondary  
281 education, 1% had tertiary education, and the remaining 31% had no education. The  
282 respondents were aged 18 – 89 years with a mean age of 40 years. Both sexes were present,  
283 with no statistically significant difference.

284 By verbal reports, 94% (95% CI: 92-95%) of the residents received at least one dose and 78%  
285 (95% CI: 76-81%) received two doses of OCV. From verbal reporting, 91% (95% CI: 90-93%) of  
286 residents received vaccine during the first round and 81% (95% CI: 78-83%) received vaccine  
287 during the second round. For many of the households, a vaccine card was available, and the  
288 vaccination card was used to confirm vaccination status. Using information from the card only,  
289 coverage was 84% (95% CI: 82-86%) and 65% (95% CI: 62-67%) for round one and round two  
290 respectively and the two-dose coverage was 62% (95% CI: 60-65%). Coverage rates are  
291 shown on Table 2. [Insert Table 2]

292  
293 Among those who did not receive a dose of vaccine, over half of these missed doses (254 of the  
294 357 missed doses during the two rounds) were because the person was not at home at the time  
295 of vaccination or was out of town. In a few cases, the vaccine team missed the household,  
296 accounting for 53 missed doses. Refusing to take vaccine was not reported.

297  
298 *Reported AEFIs.* Overall, 71 individuals of 1,274 respondents (5.6%) reported an AEFI (Table  
299 3). Determining a causal relation between the vaccination and the reported symptoms was not  
300 attempted. [Insert Table 3]

301  
302 Most AEFIs were considered mild or moderate, but 8 (0.6%) persons reported an AEFI as  
303 severe. Most (60%) of the persons reporting an AEFI did not seek treatment including 60% of  
304 those reporting a severe AEFI. 29.6% of the reported adverse events occurred in the first round,  
305 40.9% in the second round and 29.6% in both rounds. The most common symptoms were  
306 abdominal pain (15), diarrhoea, (9), fever, nausea, and headache (each 6) reports. Table 4

1  
2  
3 307 provides additional information on the AEFIs. The reported AEFIs were infrequent relative to the  
4 308 number of doses distributed and there were no serious adverse events reported. [Insert Table4]

5  
6 309

7  
8 310 ***Community knowledge of oral cholera vaccines.***

9 311 A majority (77%) of the respondents understood that vaccine was one of the ways to prevent  
10 312 cholera. There was a statistically significant association between education level and knowledge  
11 313 about OCV with those having at least a primary school education being almost twice as likely to  
12 314 know the number of required doses as compared to those with no education (OR 1.90, 95% CI  
13 315 1.06, 3.44 (P = 0.03).

14 316 *Sub-study Two, staff survey.* A total of 242 and 125 staff responded to the first and second  
15 317 knowledge and practice (KP) surveys (KP1 and KP2). Most respondents were vaccination team  
16 318 members (89% and 87% in vaccine rounds 1 and 2, respectively). Almost all the respondents  
17 319 were knowledgeable about the cause of cholera, the importance of safe water in cholera  
18 320 prevention and the vaccine target group, but were less knowledgeable regarding potential  
19 321 adverse events following administration (AEFI) or how to advise vaccinees, with 29% and 16%  
20 322 being less informed about AEFI during the first and second surveys.

21 323 When staff were asked to suggest areas that needed improvement in future OCV campaigns,  
22 324 more than 10% suggested more timely payment of allowances, more time to sensitize and  
23 325 inform the communities on the benefits of the vaccine, and better transportation and facilitation  
24 326 allowances (payments to health workers to cover the cost they incurred when administering the  
25 327 vaccines or conducting activities related to the OCV campaign). Other suggestions included  
26 328 use of both static and mobile vaccination points, provision of gumboots, umbrellas, and more  
27 329 areas for vaccine storage in sub-counties where vaccine would be more accessible, more  
28 330 workers for hard to reach areas, and an increase in the number of vaccine days to complete the  
29 331 vaccinations and increase coverage.

30 332

31 333 **DISCUSSION**

32 334 The results of this monitoring and evaluation exercise documented important findings on the  
33 335 OCV campaign, the knowledge and practices of both the community and the health staff  
34 336 involved in the campaign and implications for the conduct of future OCV campaigns as part of  
35 337 an integrated cholera control strategy. These findings suggest that the OCV campaign in Hoima  
36 338 successfully provided the vaccine to a very large proportion of the target population in Hoima  
37 339 district, western Uganda. Approximately 93.6% of respondents reported receiving at least one

1  
2  
3 340 dose and 78.3% reported receiving two doses among residents. Given the mobile and transient  
4 341 nature of this population, this was noteworthy, and suggests that even better coverage may be  
5 342 possible for more settled populations in Uganda.  
6  
7

8 343  
9 344 Since this was the first such campaign with OCV, there was concern that the population might  
10 345 be reluctant to accept it. This is a vaccine with which they were not familiar, it was given orally  
11 346 to all ages rather by injection to children, and two doses were required. Despite these potential  
12 347 constraints, we found that most people accepted taking the vaccine readily; however, some  
13 348 were not at home resulting in missed vaccinations.  
14  
15  
16  
17

18 349  
19 350 High vaccination coverage is especially important when one is attempting to achieve herd  
20 351 protection. Since it is estimated that herd protection can be achieved with a coverage even  
21 352 lower than 90%;<sup>19</sup> the high coverage achieved in this campaign would be expected to induce  
22 353 significant indirect protection even among those who did not receive vaccine.<sup>19 20</sup>  
23  
24  
25

26 354  
27 355 It was noted in the administrative report from the MoH and during a stakeholder's meeting that  
28 356 one of the reasons for the reduction in the coverage during the second OCV dose was the  
29 357 unpredictable campaign dates for the second round. The vaccine for the second round had to  
30 358 be shipped and cleared through customs, and the timing for this was not certain. To avoid this  
31 359 problem in the future, a mechanism needs to be established to provide a better timeline for  
32 360 receipt of the vaccine shipments.  
33  
34  
35

36 361  
37  
38 362 *Community Reception to OCV.* As with previous OCV campaigns outside Uganda, very few  
39 363 AEFI were reported.<sup>21 22</sup> Most of adverse events were considered mild or moderate and were  
40 364 self-limited. Despite the low prevalence of AEFI, the survey exposed the need to better inform  
41 365 the community about seeking treatment for more severe adverse events or for those that do not  
42 366 quickly resolve. This was especially true for families with little education who were less likely to  
43 367 seek medical attention for severe AEFI (data not shown). Notably, members in the community  
44 368 demonstrated good understanding of the rationale for the vaccine; however, a key takeaway  
45 369 from the survey was a need to better communicate the number of required doses, given that  
46 370 those with more education were twice as likely than those with no education to know the  
47 371 number of doses needed.  
48  
49  
50  
51  
52  
53

54 372  
55  
56  
57  
58  
59  
60

1  
2  
3 373 *Staff Reception to OCV.* Inclusion of staff KP survey contributed to the success of the project  
4 374 by identifying gaps among the staff knowledge and performance. Questioning the vaccine staff  
5 375 about their training and their experience in the field is not a common activity when conducting  
6 376 monitoring and evaluation activities during OCV campaigns. Many people had to be mobilized  
7 377 quickly and these were the key people who interacted with the communities. It was important  
8 378 that the staff accurately represent the campaign as an integrated cholera prevention program,  
9 379 but this was the first time these people carried out this role. The MoH felt it important to monitor  
10 380 their knowledge and behaviors as well as any constraints they felt in carrying out their functions.  
11 381 While they were generally knowledgeable about the disease and about the vaccine, these staff  
12 382 needed additional training regarding recognizing and managing AEFIs. They also faced  
13 383 challenges regarding logistical support. After the first staff KP survey, these gaps were  
14 384 communicated to the MoH so that appropriate actions could be taken to ensure that these gaps  
15 385 were addressed prior to the second round.  
16 386

17 387 Most other OCV campaigns have also reported high coverage rates. These have included  
18 388 reports from Bangladesh<sup>23 24</sup>, Malawi<sup>25 26</sup>, Mozambique<sup>21</sup>, Democratic Republic of Congo <sup>27</sup>,  
19 389 Zambia <sup>28</sup>, South Sudan <sup>29 30</sup>, Iraq<sup>31</sup>, Haiti<sup>32</sup>, and Guinea <sup>33</sup>. Clearly, OCV is well accepted  
20 390 among these very diverse population groups where the vaccine campaigns have been carried  
21 391 out.  
22 392

23 393 Important limitations of this study need to be mentioned. Ideally, one would prefer to conduct  
24 394 community studies prior to a campaign to understand knowledge and attitudes about cholera to  
25 395 improve communications regarding the upcoming campaign as part of an integrated strategy to  
26 396 control cholera. However, since the campaign was carried out on an emergency basis during an  
27 397 outbreak, a study prior to the campaign was not possible. Secondly, a community survey  
28 398 immediately after the first round might have provided feedback to the teams that would have  
29 399 improved the coverage for the second round. It should also be noted that a single informant  
30 400 provided information about receipt of the vaccine for all members of the household, so this  
31 401 informant might have incorrect information concerning one or more members of the household;  
32 402 however, since the vaccine was directly given to the household members together, it seems that  
33 403 inaccuracies would be minimal. It should be noted that we were not able to adjust for cluster  
34 404 sampling in the community surveys. If we have adjusted for cluster effect, it would have  
35 405 increased the variance slightly, but it would not affect the means.<sup>34</sup> The community KP survey  
36 406 did not include questions on attitudes regarding cholera. Since the survey had to be carried out

1  
2  
3 407 very quickly following the campaign, and since the survey was targeted to identify issues that  
4 408 would be immediately relevant to campaign performance, it was felt that understanding attitudes  
5 409 regarding cholera, even though important, would have required other qualitative methods  
6 410 requiring more time than was available. Similarly, direct observation of the training and  
7 411 coordination meetings would have been useful to independently assess the efficiency and  
8 412 effectiveness of these training and coordination meetings. Furthermore, there was no list of all  
9 413 workers in the campaign and many of the workers who participated in the second round had left  
10 414 prior to administering the questionnaire; thus, there were fewer respondents in the second  
11 415 round and the proportion of all workers who participated could not be determined precisely.  
12 416 Finally, it was not possible, given the time constraints, to fully integrate WASH interventions  
13 417 together with the OCV campaign, or to monitor and evaluate community and staff  
14 418 responsiveness to such integration.

15 419  
16 420 In this outbreak 2,122 cholera cases and 44 deaths were reported, nearly all before the OCV  
17 421 campaign and over half occurred in the first two weeks of the outbreak. Of note, the outbreak  
18 422 started in February 2018 at about the same time the application for preventive use of OCV was  
19 423 being submitted. The original application proposed a series of preventive campaigns over  
20 424 the next year, and Hoima, as well as neighbouring districts in western Uganda, were targeted  
21 425 for vaccination in the first round of these preventive campaigns. However, when the outbreak  
22 426 was identified, plans were quickly shifted so that an emergency campaign could be  
23 427 implemented to control the outbreak. Even though this emergency response was planned as  
24 428 quickly as possible, in fact, the outbreak was essentially over before the vaccine campaign  
25 429 could start, so it had no impact on the outbreak itself, but likely reduced the risk for future  
26 430 outbreaks.

27 431  
28 432 Though the outbreak started with the influx of the refugees from DRC into Uganda, it quickly  
29 433 spread to the refugee host communities in Hoima. Therefore, to prevent rapid spread,  
30 434 improvement of cholera prevention measures for both the refugees and the host communities is  
31 435 paramount during resettlement.

32 436

## 33 437 **CONCLUSION**

34 438 This study suggests that the OCV campaign in Hoima district to prevent cholera was successful  
35 439 and achieved a high level of coverage in this population at high risk. However, there was need

1  
2  
3 440 to devote more effort on community sensitisation on the benefits of vaccination, as well as  
4  
5 441 improving some logistic support during the campaign.

6 442  
7  
8 443 While a rapid response to this outbreak was appropriate, in fact, even with a rapidly organized  
9  
10 444 campaign, the outbreak was over before the vaccine could be given; thus, the vaccine had no  
11  
12 445 impact on this outbreak. Nevertheless, this area had already been identified as a hotspot, and it  
13  
14 446 would have been targeted if the planned preventive campaign had proceeded as originally  
15  
16 447 planned. Planners must realize that an area identified as a hotspot might experience an  
17  
18 448 outbreak while preparations are underway for a preventive campaign and take this into account  
19  
20 449 when allocating vaccine for preventive vs emergency campaigns. Since these are areas where  
21  
22 450 cholera risk is high, outbreaks are likely to occur in these areas if there are delays in  
23  
24 451 implementing preventive campaigns.  
25  
26  
27  
28  
29  
30  
31  
32  
33  
34  
35  
36  
37  
38  
39  
40  
41  
42  
43  
44  
45  
46  
47  
48  
49  
50  
51  
52  
53  
54  
55  
56  
57  
58  
59  
60

1  
2  
3  
4  
5  
6  
7  
8  
9  
10  
11  
12  
13  
14  
15  
16  
17  
18  
19  
20  
21  
22  
23  
24  
25  
26  
27  
28  
29  
30  
31  
32  
33  
34  
35  
36  
37  
38  
39  
40  
41  
42  
43  
44  
45  
46  
47  
48  
49  
50  
51  
52  
53  
54  
55  
56  
57  
58  
59  
60

453 **FIGURE LEGENDS**

454

455 **Figure 1. Epicurve of the Hoima Outbreak, 2018 with events identified in response to the**  
456 **outbreak**

457 **Figure 2: Map of Hoima District, showing sub-counties that received OCV and**  
458 **households where interviews were conducted (red dots)**

459

For peer review only

460

**Table 1. Age and Sex Breakdown of the Participants in the Cluster Survey**

| Age Group (years) | Male       | Female     | Total       |
|-------------------|------------|------------|-------------|
| 1 to 4            | 98         | 93         | 191         |
| 5 to 14           | 236        | 207        | 443         |
| 15 to 44          | 210        | 285        | 495         |
| 45+               | 80         | 65         | 145         |
| <b>Total</b>      | <b>625</b> | <b>650</b> | <b>1274</b> |

461

462

**Table 2: Vaccination coverage post OCV campaign, Hoima District, Uganda, 2018.**

| Total surveyed =<br>1274                                              | Round 1                  | Round 2                  | Received only one dose | Received two doses     | Received at least one dose |
|-----------------------------------------------------------------------|--------------------------|--------------------------|------------------------|------------------------|----------------------------|
| <b>Reported number (%) (95% CI)</b>                                   | 1,164 (91.4) (89.7-92.8) | 1,027 (80.6) (78.3-82.7) | 195 (15.3) (13.4-17.4) | 998 (78.3) (76.0-80.5) | 1193 (93.6) (92.2-94.9)    |
| <b>Confirmed by availability of the vaccination card (%) (95% CI)</b> | 1,065 (83.6) (81.5-85.5) | 823 (64.6) (61.9-67.2)   | 142 (11.1) (9.5-13.0)  | 792 (62.2) (59.5-64.8) | 934 (73.3) (70.8-75.7)     |

463

464

**Table 3: Treatment and Resolution of Adverse Events Following Immunization in Hoima District, Uganda, 2018.**

| Symptoms        | Treatment        |             | Status        |             |                               |
|-----------------|------------------|-------------|---------------|-------------|-------------------------------|
|                 | No treatment (%) | Treated (%) | Recovered (%) | Ongoing (%) | Improved, not to baseline (%) |
| <b>Mild</b>     | 24(80.0)         | 6(20.0)     | 29(96.7)      | 1(3.3)      | 0(0.0)                        |
| <b>Moderate</b> | 11(39.3)         | 17(60.7)    | 23(82.1)      | 3(10.7)     | 2(7.1)                        |
| <b>Severe</b>   | 8(61.5)          | 5(38.5)     | 10(76.9)      | 0(0.0)      | 3(23.1)                       |

465



466

467 **Table 4. Onset and frequency of symptoms reported as**  
 468 **adverse events**

|                                 | <6<br>hours | 6-12<br>hours | 12-24<br>hours | 1-7<br>days | 8-14<br>days | Total |
|---------------------------------|-------------|---------------|----------------|-------------|--------------|-------|
| 469 <b>Diarrhoea</b>            | 3           | 2             | 2              | 2           | 0            | 9     |
| 470 <b>Vomiting</b>             | 3           | 0             | 0              | 2           | 0            | 5     |
| 471 <b>Nausea</b>               | 6           | 0             | 0              | 0           | 0            | 6     |
| 472 <b>Abdominal<br/>pain</b>   | 15*         | 0             | 0              | 0           | 0            | 15    |
| 473 <b>Stomach<br/>gurgling</b> | 0           | 3             | 0              | 1           | 0            | 4     |
| 474 <b>Mouth<br/>ulcers</b>     | 0           | 0             | 0              | 0           | 1            | 1     |
| 475 <b>Cough</b>                | 1           | 1             | 0              | 3           | 1            | 6     |
| 476 <b>Felt<br/>feverish</b>    | 1           | 1             | 0              | 6           | 1            | 9     |
| 477 <b>Poor<br/>appetite</b>    | 1           | 0             | 0              | 0           | 0            | 1     |
| 478 <b>Dizziness</b>            | 0           | 3             | 0              | 0           | 0            | 3     |
| 479 <b>Fainted</b>              | 0           | 1             | 0              | 0           | 0            | 1     |
| 480 <b>Itching</b>              | 0           | 0             | 0              | 0           | 1            | 1     |
| 481 <b>Weakness</b>             | 0           | 0             | 0              | 1           | 0            | 1     |
| 482 <b>Headache</b>             | 3           | 0             | 2              | 1           | 0            | 6     |
| 483 <b>Other</b>                | 1           | 0             | 0              | 2           | 0            | 3     |
| 484 <b>Total</b>                | 34          | 11            | 4              | 18          | 4            | 71    |

485 • Three persons reported abdominal pain in one household

488

## 489 **Acknowledgements**

490 The authors thank the persons and institutions who supported Hoima district OCV monitoring  
491 and evaluation study. Special thanks are extended to the research assistants who dedicated  
492 their time to meticulously collect the data and the persons who collaborated in the preparation of  
493 the different key documents used in this study. We thank the staff, the communities in the study  
494 area and the local leadership of Hoima districts for the cooperation during this study. We are  
495 grateful to Ambrose Buyinza Wabwire for technical support with drawing of the maps.

496

497 We thank the Ministry of Health leadership for guidance; the Office of the Prime Minister (OPM)  
498 for the permission to access data on the refugee population. We are grateful to the following  
499 institutions and bodies; Ministry of Health, Makerere University School of Public Health, World  
500 Health Organisation, UNICEF and UNHCR for technical guidance.

## 501 **Footnotes**

502 **Contributors:** Conceived and designed the study: GB, MR, WAB, ABS, CGO, DAS.

503 Discussed, critically revised and approved the study protocol: GB, MR, WAB, CGO, DAS.

504 Performed the research: GB, MR, WAB, AO, FR, IA. Analysed the data: GB, MR, WAB, AO,  
505 DAS. Wrote the first draft: GB, MR. Wrote the final DAS. Elaborated, discussed and approved  
506 the final version: GB, MR, AB, ABS, AO, FR, IA, CGO, and DAS.

507

508 **Funding:** Funding for the study was provided by the Bill and Melinda Gates Foundation  
509 (OPP1148763) which provided financial support through the John Hopkins University, Delivery  
510 of Oral Cholera Vaccine Effectively (DOVE) project. The funding agency had no role in  
511 collecting, analysing or interpreting the results.

512

## 513 **Declaration of the conflict of interest**

514 The authors have no conflict of interest to declare.

515

516 **Additional data sharing:** Data are available upon reasonable request

517 **REFERENCES**

- 518
- 519 1. Clemens JD, Nair GB, Ahmed T, et al. Cholera. *Lancet* 2017 doi: 10.1016/S0140-  
520 6736(17)30559-7
- 521 2. Cholera vaccines: WHO position paper - August 2017. *Wkly Epidemiol Rec* 2017;92(34):477-  
522 98.
- 523 3. Kirigia JM, Sambo LG, Yokouide A, et al. Economic burden of cholera in the WHO African  
524 region. *BMC Int Health Hum Rights* 2009;9:8. doi: 10.1186/1472-698X-9-8
- 525 4. Lessler J, Moore SM, Luquero FJ, et al. Mapping the burden of cholera in sub-Saharan Africa  
526 and implications for control: an analysis of data across geographical scales. *Lancet*  
527 2018;391(10133):1908-15. doi: 10.1016/S0140-6736(17)33050-7
- 528 5. Bwire G, Ali M, Sack DA, et al. Identifying cholera "hotspots" in Uganda: An analysis of  
529 cholera surveillance data from 2011 to 2016. *PLoS Negl Trop Dis* 2017;11(12):e0006118.  
530 doi: 10.1371/journal.pntd.0006118
- 531 6. Cummings MJ, Wamala JF, Eyura M, et al. A cholera outbreak among semi-nomadic  
532 pastoralists in northeastern Uganda: epidemiology and interventions. *Epidemiology and*  
533 *infection* 2012;140(8):1376-85. doi: 10.1017/S0950268811001956 [published Online  
534 First: 2011/09/29]
- 535 7. Bwire G, Mwesawina M, Baluku Y, et al. Cross-Border Cholera Outbreaks in Sub-Saharan  
536 Africa, the Mystery behind the Silent Illness: What Needs to Be Done? *PLoS One*  
537 2016;11(6):e0156674. doi: 10.1371/journal.pone.0156674
- 538 8. Bwire G, Malimbo M, Maskery B, et al. The burden of cholera in Uganda. *PLoS Negl Trop Dis*  
539 2013;7(12):e2545. doi: 10.1371/journal.pntd.0002545
- 540 9. Oguttu DW, Okullo A, Bwire G, et al. Cholera outbreak caused by drinking lake water  
541 contaminated with human faeces in Kaiso Village, Hoima District, Western Uganda,  
542 October 2015. *Infect Dis Poverty* 2017;6(1):146. doi: 10.1186/s40249-017-0359-2
- 543 10. Alajo SO, Nakavuma J, Erume J. Cholera in endemic districts in Uganda during El Nino rains:  
544 2002-2003. *Afr Health Sci* 2006;6(2):93-7. doi: 10.5555/afhs.2006.6.2.93 [published  
545 Online First: 2006/08/19]
- 546 11. Montgomery M, Jones MW, Kabole I, et al. No end to cholera without basic water,  
547 sanitation and hygiene. *Bull World Health Organ* 2018;96(6):371-71A. doi:  
548 10.2471/BLT.18.213678
- 549 12. Legros D, Partners of the Global Task Force on Cholera C. Global Cholera Epidemiology:  
550 Opportunities to Reduce the Burden of Cholera by 2030. *J Infect Dis* 2018 doi:  
551 10.1093/infdis/jiy486
- 552 13. Deployments from the oral cholera vaccine stockpile, 2013-2017. *Wkly Epidemiol Rec*  
553 2017;92(32):437-42.
- 554 14. Odevall L, Hong D, Digilio L, et al. The Euvichol story - Development and licensure of a safe,  
555 effective and affordable oral cholera vaccine through global public private partnerships.  
556 *Vaccine* 2018;36(45):6606-14. doi: 10.1016/j.vaccine.2018.09.026
- 557 15. Bwire G, Munier A, Ouedraogo I, et al. Epidemiology of cholera outbreaks and socio-  
558 economic characteristics of the communities in the fishing villages of Uganda: 2011-  
559 2015. *PLoS Negl Trop Dis* 2017;11(3):e0005407. doi: 10.1371/journal.pntd.0005407

- 1  
2  
3 560 16. Uganda\_Bureau\_of\_Statistics\_(UBOS). Demographic and Health Survey. 2016 Kampala and  
4 561 Rockville Maryland 2016 [Available from:  
5 562 <https://www.dhsprogram.com/pubs/pdf/FR333/FR333.pdf> accessed Sept 18. 2020  
6 563 2020.  
7  
8 564 17. Henderson RH, Sundaresan T. Cluster sampling to assess immunization coverage: a review  
9 565 of experience with a simplified sampling method. *Bull World Health Organ*  
10 566 1982;60(2):253-60.  
11  
12 567 18. Food\_and\_Drug\_Administration. Guidance for Industry. Toxicity Grading Scale for Healthy  
13 568 Adult and Adolescent Volunteers Enrolled in Preventive Vaccine Clinical Trials Rockville,  
14 569 Maryland USA: Food and Drug Administration, Center for Biologics Evaluation and  
15 570 Research 2007 [cited 2020. Available from:  
16 571 <https://www.fda.gov/media/73679/download> accessed September 22 2020.  
17  
18 572 19. Longini IM, Jr., Nizam A, Ali M, et al. Controlling endemic cholera with oral vaccines. *PLoS*  
19 573 *medicine* 2007;4(11):e336. doi: 10.1371/journal.pmed.0040336 [published Online First:  
20 574 2007/11/30]  
21  
22 575 20. Ali M, Emch M, von Seidlein L, et al. Herd immunity conferred by killed oral cholera vaccines  
23 576 in Bangladesh: a reanalysis. *Lancet* 2005;366(9479):44-9. doi: S0140-6736(05)66550-6  
24 577 [pii]  
25  
26 578 10.1016/S0140-6736(05)66550-6 [published Online First: 2005/07/05]  
27  
28 579 21. Sema Baltazar C, Rafael F, Langa JPM, et al. Oral cholera vaccine coverage during a  
29 580 preventive door-to-door mass vaccination campaign in Nampula, Mozambique. *PLoS*  
30 581 *One* 2018;13(10):e0198592. doi: 10.1371/journal.pone.0198592  
31  
32 582 22. Phares CR, Date K, Travers P, et al. Mass vaccination with a two-dose oral cholera vaccine in  
33 583 a long-standing refugee camp, Thailand. *Vaccine* 2016;34(1):128-33. doi:  
34 584 10.1016/j.vaccine.2015.10.112  
35  
36 585 23. Khan AI, Khan IA, Siddique SA, et al. Feasibility, coverage and cost of oral cholera  
37 586 vaccination conducted by icddr,b using the existing national immunization service  
38 587 delivery mechanism in rural setting Keraniganj, Bangladesh. *Hum Vaccin Immunother*  
39 588 2019;15(6):1302-09. doi: 10.1080/21645515.2018.1528833  
40  
41 589 24. Uddin MJ, Wahed T, Saha NC, et al. Coverage and acceptability of cholera vaccine among  
42 590 high-risk population of urban Dhaka, Bangladesh. *Vaccine* 2014;32(43):5690-5. doi:  
43 591 10.1016/j.vaccine.2014.08.021  
44  
45 592 25. Grandesso F, Rafael F, Chipeta S, et al. Oral cholera vaccination in hard-to-reach  
46 593 communities, Lake Chilwa, Malawi. *Bull World Health Organ* 2018;96(12):817-25. doi:  
47 594 10.2471/BLT.17.206417  
48  
49 595 26. Sauvageot D, Saussier C, Gobeze A, et al. Oral cholera vaccine coverage in hard-to-reach  
50 596 fishermen communities after two mass Campaigns, Malawi, 2016. *Vaccine*  
51 597 2017;35(38):5194-200. doi: 10.1016/j.vaccine.2017.07.104  
52  
53 598 27. Massing LA, Aboubakar S, Blake A, et al. Highly targeted cholera vaccination campaigns in  
54 599 urban setting are feasible: The experience in Kalemie, Democratic Republic of Congo.  
55 600 *PLoS Negl Trop Dis* 2018;12(5):e0006369. doi: 10.1371/journal.pntd.0006369  
56  
57  
58  
59  
60

- 1  
2  
3 601 28. Poncin M, Zulu G, Voute C, et al. Implementation research: reactive mass vaccination with  
4 602 single-dose oral cholera vaccine, Zambia. *Bull World Health Organ* 2018;96(2):86-93.  
5 603 doi: 10.2471/BLT.16.189241  
6  
7 604 29. Parker LA, Rumunu J, Jamet C, et al. Neighborhood-targeted and case-triggered use of a  
8 605 single dose of oral cholera vaccine in an urban setting: Feasibility and vaccine coverage.  
9 606 *PLoS Negl Trop Dis* 2017;11(6):e0005652. doi: 10.1371/journal.pntd.0005652  
10  
11 607 30. Porta MI, Lenglet A, de Weerd S, et al. Feasibility of a preventive mass vaccination  
12 608 campaign with two doses of oral cholera vaccine during a humanitarian emergency in  
13 609 South Sudan. *Trans R Soc Trop Med Hyg* 2014;108(12):810-5. doi:  
14 610 10.1093/trstmh/tru153  
15  
16 611 31. Lam E, Al-Tamimi W, Russell SP, et al. Oral Cholera Vaccine Coverage during an Outbreak  
17 612 and Humanitarian Crisis, Iraq, 2015. *Emerg Infect Dis* 2017;23(1):38-45. doi:  
18 613 10.3201/eid2301.160881  
19  
20 614 32. Tohme RA, Francois J, Wannemuehler K, et al. Oral Cholera Vaccine Coverage, Barriers to  
21 615 Vaccination, and Adverse Events following Vaccination, Haiti, 2013. *Emerg Infect Dis*  
22 616 2015;21(6):984-91. doi: 10.3201/eid2106.141797  
23  
24 617 33. Luquero FJ, Grout L, Ciglenecki I, et al. First outbreak response using an oral cholera vaccine  
25 618 in Africa: vaccine coverage, acceptability and surveillance of adverse events, Guinea,  
26 619 2012. *PLoS Negl Trop Dis* 2013;7(10):e2465. doi: 10.1371/journal.pntd.0002465  
27  
28 620 34. Population\_Survey\_Analysis. Methods: Complex sampling: populationsurveyanalysis.com;  
29 621 [Available from: [http://www.populationsurveyanalysis.com/wp-](http://www.populationsurveyanalysis.com/wp-content/uploads/2014/09/complexsampling_handout.pdf)  
30 622 [content/uploads/2014/09/complexsampling\\_handout.pdf](http://www.populationsurveyanalysis.com/wp-content/uploads/2014/09/complexsampling_handout.pdf) accessed November 17, 2020  
31 623 2020.  
32  
33  
34  
35  
36  
37  
38  
39  
40  
41  
42  
43  
44  
45  
46  
47  
48  
49  
50  
51  
52  
53  
54  
55  
56  
57  
58  
59  
60

1  
2  
3  
4  
5  
6  
7  
8  
9  
10  
11  
12  
13  
14  
15  
16  
17  
18  
19  
20  
21  
22  
23  
24  
25  
26  
27  
28  
29  
30  
31  
32  
33  
34  
35  
36  
37  
38  
39  
40  
41  
42  
43  
44  
45  
46  
47  
48  
49  
50  
51  
52  
53  
54  
55  
56  
57  
58  
59  
60



Figure 1. Epicurve of the Hoima Outbreak, 2018 with events identified in response to the outbreak

542x305mm (300 x 300 DPI)

1  
2  
3  
4  
5  
6  
7  
8  
9  
10  
11  
12  
13  
14  
15  
16  
17  
18  
19  
20  
21  
22  
23  
24  
25  
26  
27  
28  
29  
30  
31  
32  
33  
34  
35  
36  
37  
38  
39  
40  
41  
42  
43  
44  
45  
46  
47  
48  
49  
50  
51  
52  
53  
54  
55  
56  
57  
58  
59  
60



Figure 2: Map of Hoima District, showing sub-counties that received OCV and households where interviews were conducted (red dots)

170x119mm (300 x 300 DPI)
